# Supplementary material for: Novel 1,3,4-Thiadiazole Derivatives: Synthesis, Antiviral Bioassay and Regulation the Photosynthetic Pathway of Tobacco against TMV Infection
Source: MDPI journal article supplement (doi:10.3390/ijms24108881), 2023-05-17
Supplement: s1 [file s1]

# Novel 1,3,4-Thiadiazole Derivatives: Synthesis, Antiviral Bioassay, and Regulation the Photosynthetic Pathway of Tobacco against TMV Infection

Huanlin Zheng <sup>1</sup>, Fanglin Wen <sup>1</sup>, Chengzhi Zhang <sup>1</sup>, Rui Luo <sup>2</sup> and Zhibing Wu <sup>1,\*</sup>

<sup>1</sup> State Key Laboratory Breeding Base of Green Pesticide and Agricultural Bioengineering, Key Laboratory of Green Pesticide and Agricultural Bioengineering, Ministry of Education, Center for R&D of Fine Chemicals of Guizhou University, Guiyang 550025, China

<sup>2</sup> College of Life Sciences, Guizhou University, Guiyang 550025, China

\* Correspondence: zbwu@gzu.edu.cn

## Supporting Information

|                                                                                                     |       |
|-----------------------------------------------------------------------------------------------------|-------|
| 1. Detailed Antiviral Biological Assay Methods.....                                                 | 2-3   |
| 2. Detailed Inhibition Rate of EC <sub>50</sub> Values .....                                        | 3-4   |
| 3. Crystallographic Data of Title Compound E <sub>3</sub> .....                                     | 4-5   |
| 4. Protective and Curative Activity Images of Title Compounds.....                                  | 5-6   |
| 5. <sup>1</sup> H NMR, <sup>13</sup> C NMR and HRMS Data of Intermediates and Title Compounds ..... | 7-13  |
| 6. Copies of Intermediates and Title Compounds .....                                                | 13-64 |

## 1. Detailed Antiviral Biological Assay Methods

The antiviral biological assay was carried out in a growth chamber at a temperature of 25 °C. The synthesized compounds were first dissolved within a suitable amount of DMSO and diluted with water containing 0.1% TW-80 to make a concentration of 500 µg/mL, and the commercialized antiviral agent ningnanmycin was used as the positive control. Ningnanmycin is 8% aqueous solution (Huaqiang biological, Wuhan, China), which can be diluted directly with water to the corresponding concentration.

### 1.1 Inactivation Effect of Compounds against TMV *in vivo*

To test viral inhibition, equal volumes of the virus ( $1.2 \times 10^{-2}$  µg/mL) and the solution (1.0 mg/mL) of synthesized compounds or controls were mixed together for 30 min. The mixture was then inoculated into the growing *N. glutinosa*. leaves of the same age (4–5 leaves) by rubbing emery, and another pot was inoculated with the mixture of solvent and the virus by rubbing emery as the control. Then, the leaves were washed with water after 30 min. The local lesion numbers were recorded 2–3 days after inoculation. There are three replicates for each compound.

### 1.2 Curative Effect of Compounds against TMV *in vivo*

TMV ( $6 \times 10^{-3}$  µg/mL) was inoculated on the growing leaves of *N. glutinosa*. of the same age by rubbing emery. Then, the leaves were washed with water and dried. The solution (500 µg/mL) of synthesized compounds or controls was smeared on the inoculated leaves, while inoculated leaves in another pot were smeared with the solvent as a control. The local lesion numbers were recorded 2–3 days after inoculation. There are three replicates for each compound.

### 1.3 Protective Effect of Compounds against TMV *in vivo*

The solution (500 µg/mL) of synthesized compounds and ningnanmycin was sprayed on growing *N. glutinosa*. leaves of the same age. In another pot, the leaves were sprayed with the solvent as a control. The leaves were then inoculated with the virus after 24 h by rubbing emery, and then wash the leaves with clear water after 30 min. The total local lesion numbers appearing on the leaves 2–3 days after inoculation were recorded. There are three replicates for each compound.

### 1.4 Determination of EC<sub>50</sub> Values

Taking the process of EC<sub>50</sub> value testing for the target E<sub>2</sub> as an example, 4 mg compound E<sub>2</sub> was accurately weighed and dissolved in 80 µL of DMSO to give a mother liquor. Then, 40 µL solution

was taken out and mixed with 4 mL 0.1% TW-80 water to give the first concentration (500 µg/mL); after adding 40 µL DMSO to the remaining 40 µL of solution, 40 µL solution was taken out and mixed with another 4 mL 0.1% TW-80 water to give the second concentration (250 µg/mL). According to the same operation to prepare solutions of different concentrations. And the EC<sub>50</sub> values of target compounds against TMV were measured. There are three replicates for each compound.

The calculation formula for the inhibition rate of the test compound against TMV is as follows:

$$Y = (C-A)/C \times 100\%.$$

Y: the inhibitory rate of the compound against plant viruses; C: the number of dead spots in the control group (the left half of the leaf); A: the number of dead spots in the compound treatment group (the right half of the leaf).

## 2. Detailed Inhibition Rate of EC<sub>50</sub> Values

The EC<sub>50</sub> value is calculated by the linear equation that determines the inhibitory activity of compounds against viruses at five concentration gradients, respectively, and the inhibitory activity at different concentrations was shown in Table S1 and Table S2.

**Table S1.** The EC<sub>50</sub> values of some title compounds for curative activity <sup>a</sup> (µg/mL).

| NO.             | Inhibition rate ± SD (%) |            |            |            |            |
|-----------------|--------------------------|------------|------------|------------|------------|
|                 | 500                      | 250        | 125        | 62.5       | 31.25      |
| E <sub>2</sub>  | 50.6 ± 2.2               | 46.4 ± 6.3 | 41.5 ± 6.8 | 34.2 ± 3.1 | 26.5 ± 2.3 |
| E <sub>8</sub>  | 59.2 ± 6.6               | 45.4 ± 3.4 | 39.4 ± 4.8 | 31.6 ± 2.7 | 29.8 ± 3.1 |
| E <sub>9</sub>  | 50.6 ± 4.1               | 46.7 ± 7.6 | 36.4 ± 5.5 | 32.0 ± 5.5 | 27.8 ± 2.4 |
| E <sub>20</sub> | 52.2 ± 6.6               | 46.9 ± 4.8 | 39.1 ± 3.2 | 35.6 ± 4.6 | 28.5 ± 2.6 |
| E <sub>21</sub> | 50.5 ± 5.6               | 46.1 ± 4.8 | 40.0 ± 4.2 | 35.8 ± 3.4 | 31.2 ± 4.3 |
| NNM*            | 57.9 ± 6.6               | 53.3 ± 6.8 | 47.3 ± 6.8 | 41.8 ± 5.7 | 32.0 ± 7.4 |

\* ningnanmycin; <sup>a</sup> Each experiment was performed in triplicate.

**Table S2.** The EC<sub>50</sub> values of some title compounds for protective activity <sup>a</sup> (µg/mL).

| NO.                   | Inhibition rate $\pm$ SD (%) |                |                |                |                |
|-----------------------|------------------------------|----------------|----------------|----------------|----------------|
|                       | 500                          | 250            | 125            | 62.5           | 31.25          |
| <b>E<sub>2</sub></b>  | 65.1 $\pm$ 4.1               | 48.1 $\pm$ 7.4 | 41.0 $\pm$ 5.4 | 36.5 $\pm$ 4.8 | 32.3 $\pm$ 3.7 |
| <b>E<sub>10</sub></b> | 50.3 $\pm$ 4.5               | 44.8 $\pm$ 2.4 | 37.8 $\pm$ 6.4 | 32.9 $\pm$ 4.4 | 28.0 $\pm$ 4.9 |
| <b>E<sub>14</sub></b> | 63.0 $\pm$ 5.0               | 46.9 $\pm$ 3.3 | 39.4 $\pm$ 5.1 | 32.7 $\pm$ 5.4 | 27.4 $\pm$ 4.0 |
| <b>E<sub>17</sub></b> | 61.3 $\pm$ 4.3               | 44.4 $\pm$ 5.9 | 40.5 $\pm$ 5.2 | 36.4 $\pm$ 7.3 | 30.5 $\pm$ 6.4 |
| <b>E<sub>21</sub></b> | 56.6 $\pm$ 3.7               | 41.5 $\pm$ 3.4 | 37.4 $\pm$ 2.3 | 32.5 $\pm$ 5.1 | 27.8 $\pm$ 4.8 |
| <b>NNM*</b>           | 56.0 $\pm$ 3.6               | 48.7 $\pm$ 5.2 | 43.5 $\pm$ 3.8 | 38.9 $\pm$ 5.8 | 34.2 $\pm$ 3.9 |

\* ningnanmycin; <sup>a</sup> Each experiment was performed in triplicate.

### 3. Crystallographic Data of Title Compound E<sub>3</sub>

**Table S3.** The crystal data of compound E<sub>3</sub>.

|                                         |                                                                 |
|-----------------------------------------|-----------------------------------------------------------------|
| Empirical formula                       | C <sub>18</sub> H <sub>14</sub> ClN <sub>5</sub> S <sub>2</sub> |
| Formula weight                          | 399.91                                                          |
| Temperature/K                           | 273.15                                                          |
| Crystal system                          | monoclinic                                                      |
| Space group                             | P2 <sub>1</sub> /c                                              |
| a/Å                                     | 20.6463(17)                                                     |
| b/Å                                     | 7.6779(7)                                                       |
| c/Å                                     | 11.7492(11)                                                     |
| $\alpha$ /°                             | 90                                                              |
| $\beta$ /°                              | 90.755(4)                                                       |
| $\gamma$ /°                             | 90                                                              |
| Volume/Å <sup>3</sup>                   | 1862.3(3)                                                       |
| Z                                       | 4                                                               |
| $\rho_{\text{calc}}$ /g/cm <sup>3</sup> | 1.426                                                           |
| $\mu$ /mm <sup>-1</sup>                 | 4.011                                                           |
| F (000)                                 | 824.0                                                           |
| Crystal size/mm <sup>3</sup>            | 0.23 $\times$ 0.22 $\times$ 0.19                                |



|                                                |                                                                  |
|------------------------------------------------|------------------------------------------------------------------|
| Radiation                                      | CuK $\alpha$ ( $\lambda = 1.54178$ )                             |
| 2 $\theta$ range for data collection/ $^\circ$ | 8.566 to 139.782                                                 |
| Index ranges                                   | $-25 \leq h \leq 25$ , $-9 \leq k \leq 6$ , $-14 \leq l \leq 14$ |
| Reflections collected                          | 15356                                                            |
| Independent reflections                        | 3506 [ $R_{\text{int}} = 0.1163$ , $R_{\text{sigma}} = 0.2355$ ] |
| Data/restraints/parameters                     | 3506/0/236                                                       |
| Goodness-of-fit on $F^2$                       | 1.062                                                            |
| Final R indexes [ $I \geq 2\sigma(I)$ ]        | $R_1 = 0.0734$ , $wR_2 = 0.1998$                                 |
| Final R indexes [all data]                     | $R_1 = 0.1821$ , $wR_2 = 0.2243$                                 |
| Largest diff. peak/hole / $e \text{ \AA}^{-3}$ | 0.38/-0.61                                                       |

#### 4. Protective and Curative Activity Images of Title Compounds

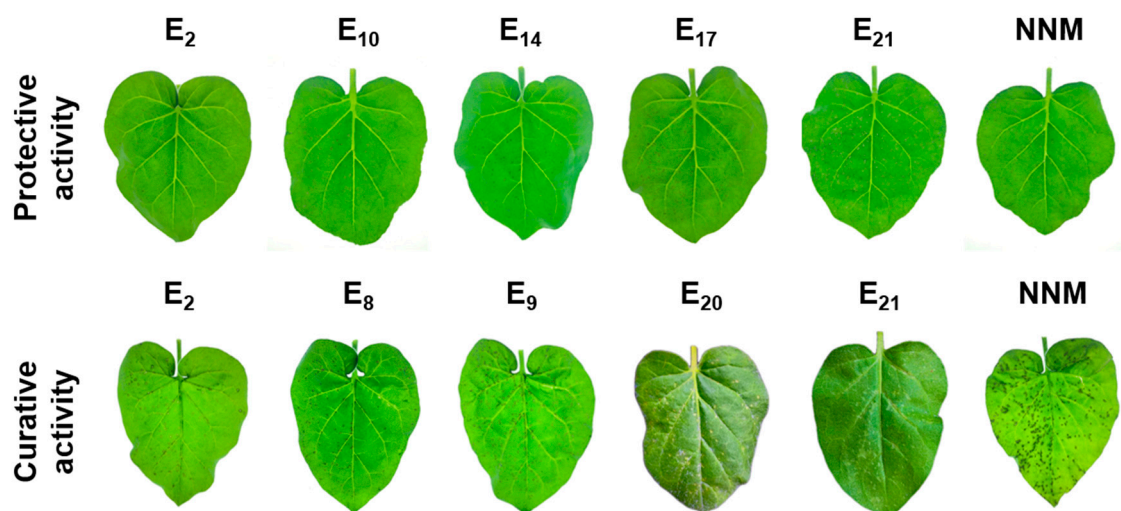

**Figure S1.** The protective and curative activity of some title compounds at 500  $\mu\text{g/mL}$ .

(NNM: Ningnanmycin; Right leaf: with the treatment of compounds; Left leaf: with the treatment of PBS.)

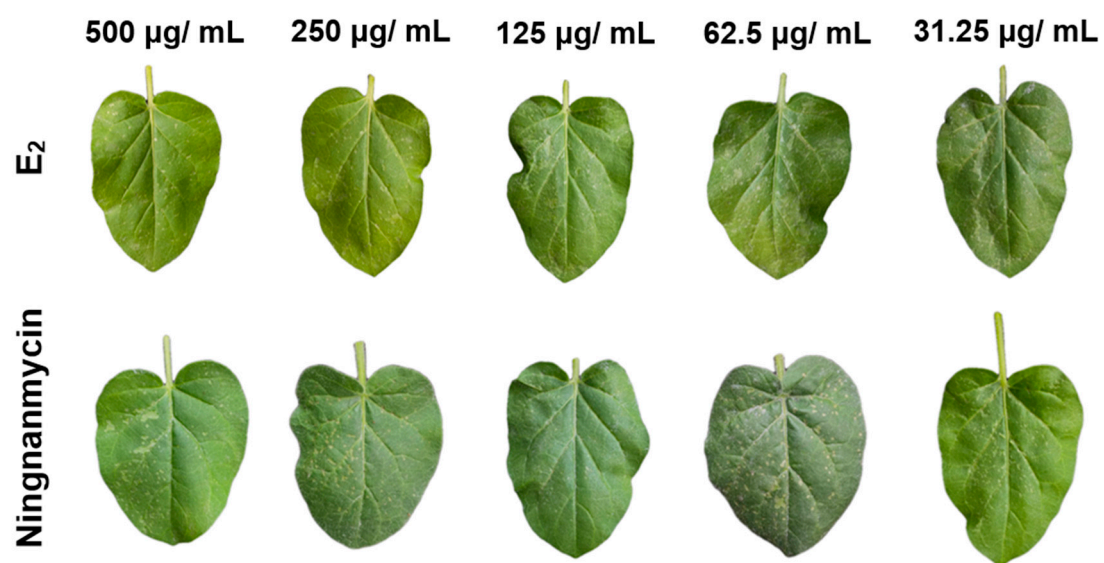

**Figure S2.** Protective activity images of title compound **E<sub>2</sub>** and ningnanmycin at different concentrations.

(Right leaf: with the treatment of compounds; Left leaf: with the treatment of PBS.)

## 5. <sup>1</sup>H NMR, <sup>13</sup>C NMR and HRMS Data of Intermediates and Title Compounds

*date for B:* light yellow solid, yield 94%, m.p. 91–92 °C. <sup>1</sup>H NMR (400 MHz, CDCl<sub>3</sub>) δ 7.71 (s, 1H, benzene H), 7.53–7.40 (m, 4H, benzene H), 7.39–7.31 (m, 1H, benzene H), 5.34 (s, 2H, NH<sub>2</sub>), 4.25 (q, *J* = 7.1 Hz, 2H, CH<sub>2</sub>CH<sub>3</sub>), 1.32 (t, *J* = 7.1 Hz, 3H, CH<sub>2</sub>CH<sub>3</sub>); <sup>13</sup>C NMR (101 MHz, CDCl<sub>3</sub>) δ 164.41, 148.92, 140.47, 137.43, 129.57, 127.93, 123.61, 95.95, 59.50, 14.38; HRMS (ESI): *m/z* calcd for C<sub>12</sub>H<sub>14</sub>O<sub>2</sub>N<sub>3</sub> [M+H]<sup>+</sup>, 232.10805; found, 232.10805.

*date for C:* white solid, yield 80%, m.p. 182–183 °C. <sup>1</sup>H NMR (400 MHz, DMSO-*d*<sub>6</sub>) δ 9.16 (s, 1H, NHNH<sub>2</sub>), 7.89 (s, 1H, pyrazole H), 7.57–7.50 (m, 4H, benzene H), 7.40 (t, *J* = 16.0 Hz, 1H, benzene H), 6.33 (s, 2H, NHNH<sub>2</sub>), 4.27 (s, 2H, NH<sub>2</sub>); <sup>13</sup>C NMR (101 MHz, DMSO-*d*<sub>6</sub>) δ 164.88, 149.36, 138.65, 138.42, 129.85, 127.53, 123.52, 96.55; HRMS (ESI): *m/z* calcd for C<sub>12</sub>H<sub>12</sub>ON<sub>5</sub> [M+H]<sup>+</sup>, 218.10364; found, 218.10362.

*date for D:* yellow solid, yield 50%, m.p. 210–211 °C. <sup>1</sup>H NMR (400 MHz, DMSO-*d*<sub>6</sub>) δ 14.44 (s, 1H, SH), 7.80 (s, 1H, pyrazole H), 7.56 (d, *J* = 4.0 Hz, 4H, benzene H), 7.46–7.41 (m, 1H, benzene H), 6.21 (s, 2H, NH<sub>2</sub>); <sup>13</sup>C NMR (101 MHz, DMSO-*d*<sub>6</sub>) δ 185.01, 155.69, 145.52, 139.45, 138.15, 130.00, 128.20, 124.13, 94.74; HRMS (ESI): *m/z* calcd for C<sub>9</sub>H<sub>14</sub>N<sub>5</sub>S<sub>2</sub> [M+H]<sup>+</sup>, 256.06851; found, 256.06848.

*date for E<sub>1</sub>:* light yellow solid, yield 72%, m.p. 155–156 °C. <sup>1</sup>H NMR (400 MHz, CDCl<sub>3</sub>) δ 8.32 (s, 1H, pyrazole H), 8.14 (dd, *J* = 8.2, 2.2 Hz, 1H, benzene H), 7.80 (d, *J* = 7.4 Hz, 1H, benzene H), 7.62–7.46 (m, 6H, benzene H), 7.42 (t, *J* = 7.2 Hz, 1H, benzene H), 5.64 (s, 2H, NH<sub>2</sub>), 4.62 (s, 2H, CH<sub>2</sub>); <sup>13</sup>C NMR (101 MHz, CDCl<sub>3</sub>) δ 162.90, 158.32, 148.29, 144.71, 139.35, 138.59, 137.48, 135.20, 129.84, 129.64, 128.28, 123.98, 123.77, 122.83, 95.30, 37.06; HRMS (ESI): *m/z* calcd for C<sub>19</sub>H<sub>18</sub>N<sub>6</sub>O<sub>2</sub>S<sub>2</sub> [M+H]<sup>+</sup>, 380.0998; found, 380.0989.

*date for E<sub>2</sub>:* yellow solid, yield 52%, m.p. 134–135 °C. <sup>1</sup>H NMR (400 MHz, CDCl<sub>3</sub>) δ 7.62–7.56 (m, 3H, benzene H), 7.53 (t, *J* = 7.5 Hz, 3H, benzene H), 7.41 (t, *J* = 8.0 Hz, 2H, benzene H), 7.22 (dd, *J* = 14.0, 7.3 Hz, 2H, benzene H), 5.66 (s, 1H, NH<sub>2</sub>), 4.66 (s, 1H, CH<sub>2</sub>); <sup>13</sup>C NMR (101 MHz, CDCl<sub>3</sub>) δ 162.74, 159.51, 144.69, 139.37, 137.58, 134.35, 133.98, 131.24, 129.80, 129.35, 128.21, 127.02, 123.77, 95.47, 36.12; HRMS (ESI): *m/z* calcd for C<sub>18</sub>H<sub>15</sub>N<sub>5</sub>ClS<sub>2</sub> [M+H]<sup>+</sup>, 400.0452; found, 400.0446.

*date for E<sub>3</sub>:* white solid, yield 60%, m.p. 163–164 °C. <sup>1</sup>H NMR (400 MHz, CDCl<sub>3</sub>) δ 7.65 (s, 1H, pyrazole H), 7.55 (dt, *J* = 15.5, 7.7 Hz, 4H, benzene H), 7.43 (t, *J* = 7.1 Hz, 1H, benzene H), 7.36 (d,

$J = 8.5$  Hz, 2H, benzene H), 7.30 (d,  $J = 8.5$  Hz, 2H, benzene H), 4.50 (s, 2H, CH<sub>2</sub>); <sup>13</sup>C NMR (101 MHz, CDCl<sub>3</sub>)  $\delta$  162.46, 159.61, 144.88, 139.04, 136.99, 134.46, 133.79, 130.45, 129.92, 128.90, 128.57, 123.95, 95.26, 37.67; HRMS (ESI):  $m/z$  calcd for C<sub>18</sub>H<sub>15</sub>N<sub>5</sub>ClS<sub>2</sub> [M+H]<sup>+</sup>, 400.0452; found, 400.0443.

*date for E<sub>4</sub>*: light yellow solid, yield 60%, m.p. 140–141 °C. <sup>1</sup>H NMR (400 MHz, DMSO-*d*<sub>6</sub>)  $\delta$  7.86 (s, 2H, pyrazole H), 7.61–7.54 (m, 5H, benzene H), 7.45–7.36 (m, 4H, benzene H), 6.55 (s, 2H, NH<sub>2</sub>), 4.56 (s, 2H, CH<sub>2</sub>); <sup>13</sup>C NMR (101 MHz, DMSO-*d*<sub>6</sub>)  $\delta$  163.08, 159.04, 145.86, 140.24, 139.93, 138.35, 133.49, 130.88, 129.97, 129.32, 128.25, 128.06, 128.03, 123.95, 95.06, 37.43; HRMS (ESI):  $m/z$  calcd for C<sub>18</sub>H<sub>15</sub>N<sub>5</sub>ClS<sub>2</sub> [M+H]<sup>+</sup>, 400.0452; found, 400.0445.

*date for E<sub>5</sub>*: light yellow solid, yield 49%, m.p. 129–130 °C. <sup>1</sup>H NMR (400 MHz, CDCl<sub>3</sub>)  $\delta$  7.65 (s, 1H, pyrazole H), 7.62–7.49 (m, 4H, benzene H), 7.44 (t,  $J = 7.2$  Hz, 1H, benzene H), 7.36 (d,  $J = 7.3$  Hz, 1H, benzene H), 7.25–7.13 (m, 3H, benzene H), 4.59 (s, 2H, CH<sub>2</sub>), 2.45 (s, 3H, CH<sub>3</sub>); <sup>13</sup>C NMR (101 MHz, CDCl<sub>3</sub>)  $\delta$  162.34, 160.49, 144.96, 139.15, 137.21, 137.11, 133.25, 130.77, 130.28, 129.98, 128.61, 128.46, 126.41, 124.01, 95.33, 36.92, 19.28; HRMS (ESI):  $m/z$  calcd for C<sub>19</sub>H<sub>18</sub>N<sub>5</sub>S<sub>2</sub> [M+H]<sup>+</sup>, 380.0998; found, 380.0992.

*date for E<sub>6</sub>*: white solid, yield 44%, m.p. 163–164 °C. <sup>1</sup>H NMR (400 MHz, CDCl<sub>3</sub>)  $\delta$  7.64 (s, 1H, pyrazole H), 7.55 (dt,  $J = 15.5, 7.7$  Hz, 4H, benzene H), 7.43 (t,  $J = 7.2$  Hz, 1H, benzene H), 7.31 (d,  $J = 8.0$  Hz, 2H, benzene H), 7.14 (d,  $J = 7.9$  Hz, 2H, benzene H), 5.43 (s, 2H, NH<sub>2</sub>), 4.51 (s, 2H, CH<sub>2</sub>), 2.34 (s, 3H, CH<sub>3</sub>); <sup>13</sup>C NMR (101 MHz, CDCl<sub>3</sub>)  $\delta$  162.27, 160.50, 144.94, 139.10, 137.85, 137.07, 132.59, 129.97, 129.52, 129.09, 128.61, 124.01, 95.34, 38.47, 21.21; HRMS (ESI):  $m/z$  calcd for C<sub>19</sub>H<sub>18</sub>N<sub>5</sub>S<sub>2</sub> [M+H]<sup>+</sup>, 380.0998; found, 380.0992.

*date for E<sub>7</sub>*: yellow solid, yield 71%, m.p. 150–151 °C. <sup>1</sup>H NMR (400 MHz, DMSO-*d*<sub>6</sub>)  $\delta$  7.86 (s, 1H, pyrazole H), 7.65–7.53 (m, 4H, benzene H), 7.49 (dd,  $J = 8.8, 5.5$  Hz, 2H, benzene H), 7.43 (t,  $J = 7.1$  Hz, 1H, benzene H), 7.17 (t,  $J = 8.9$  Hz, 2H, benzene H), 6.55 (s, 2H, NH<sub>2</sub>), 4.54 (s, 2H, CH<sub>2</sub>); <sup>13</sup>C NMR (101 MHz, DMSO-*d*<sub>6</sub>)  $\delta$  163.23, 162.98, 160.80, 159.24, 145.84, 140.23, 138.36, 133.48–133.45 (d,  $J = 3.0$  Hz), 131.66 (d,  $J = 8.0$  Hz), 129.97, 128.03, 123.94, 115.97, 115.75, 95.08, 37.45; <sup>19</sup>F NMR (376 MHz, DMSO)  $\delta$  -114.51 – -114.61 (m); HRMS (ESI):  $m/z$  calcd for C<sub>18</sub>H<sub>15</sub>N<sub>5</sub>FS<sub>2</sub> [M+H]<sup>+</sup>, 384.0708; found, 384.0747.

*date for E<sub>8</sub>*: white solid, yield 67%, m.p. 107–108 °C. <sup>1</sup>H NMR (400 MHz, CDCl<sub>3</sub>)  $\delta$  7.63 (s, 1H,

pyrazole H), 7.54 (dt,  $J = 15.6, 7.7$  Hz, 4H, benzene H), 7.42 (t,  $J = 7.2$  Hz, 1H, benzene H), 7.25–7.20 (m, 1H, benzene H), 7.02–6.92 (m, 2H, benzene H), 6.83 (d,  $J = 8.2$  Hz, 1H, benzene H), 4.51 (s, 2H, CH<sub>2</sub>), 3.79 (s, 3H, OCH<sub>3</sub>); <sup>13</sup>C NMR (101 MHz, CDCl<sub>3</sub>)  $\delta$  162.39, 160.24, 159.85, 144.93, 139.14, 137.18, 129.97, 129.85, 128.58, 123.99, 121.47, 114.68, 114.61, 113.64, 95.34, 55.31, 38.63; HRMS (ESI):  $m/z$  calcd for C<sub>19</sub>H<sub>18</sub>ON<sub>5</sub>S<sub>2</sub> [M+H]<sup>+</sup>, 396.0947; found, 396.0940.

*date for E<sub>9</sub>*: white solid, yield 66%, m.p. 157–158 °C. <sup>1</sup>H NMR (400 MHz, DMSO-*d*<sub>6</sub>)  $\delta$  7.86 (s, 1H, pyrazole H), 7.67–7.51 (m, 4H, benzene H), 7.43 (t,  $J = 7.2$  Hz, 1H, benzene H), 7.37 (d,  $J = 8.7$  Hz, 2H, benzene H), 6.90 (d,  $J = 8.7$  Hz, 2H, benzene H), 6.56 (s, 2H, NH<sub>2</sub>), 4.49 (s, 2H, CH<sub>2</sub>), 3.73 (s, 3H, OCH<sub>3</sub>); <sup>13</sup>C NMR (101 MHz, DMSO-*d*<sub>6</sub>)  $\delta$  162.80, 159.63, 159.22, 145.83, 140.22, 138.37, 130.84, 129.97, 128.67, 128.01, 123.93, 114.44, 95.12, 55.55, 38.02; HRMS (ESI):  $m/z$  calcd for C<sub>19</sub>H<sub>18</sub>ON<sub>5</sub>S<sub>2</sub> [M+H]<sup>+</sup>, 396.0947; found, 396.0939.

*date for E<sub>10</sub>*: yellow solid, yield 63%, m.p. 136–137 °C. <sup>1</sup>H NMR (500 MHz, DMSO-*d*<sub>6</sub>)  $\delta$  7.87 (s, 1H, pyrazole H), 7.75 (m, 2H, benzene H), 7.68 (t,  $J = 7.6$  Hz, 1H, benzene H), 7.61 (d,  $J = 7.3$  Hz, 2H, benzene H), 7.55 (m, 3H, benzene H), 7.43 (t,  $J = 7.3$  Hz, 1H, benzene H), 6.57 (s, 2H, NH<sub>2</sub>), 4.71 (s, 2H, CH<sub>2</sub>); <sup>13</sup>C NMR (126 MHz, DMSO-*d*<sub>6</sub>)  $\delta$  162.94, 158.03, 145.45, 139.80, 137.88, 134.54, 133.01, 131.98, 129.49, 128.57, 127.56, 127.30, 127.06, 126.34, 125.37, 123.49, 123.19, 94.59, 34.74; <sup>19</sup>F NMR (376 MHz, DMSO-*d*<sub>6</sub>)  $\delta$  -59.32 – -59.54 (d,  $J = 80.4$  Hz); HRMS (ESI):  $m/z$  calcd for C<sub>19</sub>H<sub>15</sub>F<sub>3</sub>N<sub>5</sub>S<sub>2</sub> [M+H]<sup>+</sup>, 434.0716; found, 434.0707.

*date for E<sub>11</sub>*: white solid, yield 64%, m.p. 154–155 °C. <sup>1</sup>H NMR (400 MHz, CDCl<sub>3</sub>)  $\delta$  7.69 (s, 1H, pyrazole H), 7.63 (d,  $J = 4.0$  Hz, 2H, benzene H), 7.56 (dt,  $J = 15.6, 7.8$  Hz, 5H, benzene H), 7.5 (dd,  $J = 18.3, 7.5$  Hz, 2H, benzene H), 4.59 (s, 2H, CH<sub>2</sub>); <sup>13</sup>C NMR (101 MHz, CDCl<sub>3</sub>)  $\delta$  162.65, 159.25, 144.91, 139.14, 137.15, 132.54, 129.97, 129.29, 128.57, 125.92, 125.88, 124.81, 124.78, 123.98, 95.35, 37.74; <sup>19</sup>F NMR (376 MHz, CDCl<sub>3</sub>)  $\delta$  -62.63 (s); HRMS (ESI):  $m/z$  calcd for C<sub>19</sub>H<sub>15</sub>F<sub>3</sub>N<sub>5</sub>S<sub>2</sub> [M+H]<sup>+</sup>, 434.0716; found, 434.0708.

*date for E<sub>12</sub>*: white solid, yield 70%, m.p. 173–174 °C. <sup>1</sup>H NMR (400 MHz, CDCl<sub>3</sub>)  $\delta$  7.66 (s, 1H, pyrazole H), 7.57 (m, 8H, benzene H), 7.44 (t,  $J = 7.0$  Hz, 1H, benzene H), 5.46 (s, 2H, NH<sub>2</sub>), 4.58 (s, 2H, CH<sub>2</sub>); <sup>13</sup>C NMR (101 MHz, CDCl<sub>3</sub>)  $\delta$  162.56, 159.44, 144.98, 140.20, 138.99, 136.88, 130.02, 129.48, 128.75, 125.80–125.69 ( $J = 11.0$  Hz), 124.06, 95.26, 37.62; <sup>19</sup>F NMR (376 MHz, CDCl<sub>3</sub>)  $\delta$  -62.59 (s); HRMS (ESI):  $m/z$  calcd for C<sub>19</sub>H<sub>15</sub>F<sub>3</sub>N<sub>5</sub>S<sub>2</sub> [M+H]<sup>+</sup>, 434.0716; found, 434.0703.

*date for E<sub>13</sub>*: yellow solid, yield 62%, m.p. 116–117 °C. <sup>1</sup>H NMR (400 MHz, CDCl<sub>3</sub>) δ 7.62 (s, 1H, pyrazole H), 7.58 (d, *J* = 7.4 Hz, 2H, benzene H), 7.52 (t, *J* = 7.6 Hz, 2H, benzene H), 7.41 (t, *J* = 7.3 Hz, 1H, benzene H), 6.05–5.95 (m, 1H, CH=CH<sub>2</sub>), 5.66 (s, 2H, NH<sub>2</sub>), 5.36 (d, *J* = 16.0 Hz, 1H, CH=CH<sub>2</sub>), 3.93 (d, *J* = 8.0 Hz, 2H, SCH<sub>2</sub>); <sup>13</sup>C NMR (101 MHz, CDCl<sub>3</sub>) δ 162.68, 159.63, 144.77, 139.42, 137.66, 132.17, 129.86, 128.25, 123.81, 119.47, 95.55, 37.15; HRMS (ESI): *m/z* calcd for C<sub>14</sub>H<sub>14</sub>N<sub>5</sub>S<sub>2</sub> [M+H]<sup>+</sup>, 316.0686; found, 316.0678.

*date for E<sub>14</sub>*: light yellow solid, yield 61%, m.p. 165–166 °C. <sup>1</sup>H NMR (400 MHz, CDCl<sub>3</sub>) δ 7.66 (s, 1H, pyrazole H), 7.61–7.50 (m, 4H, benzene H), 7.44 (t, *J* = 7.2 Hz, 1H, benzene H), 5.41 (s, 2H, NH<sub>2</sub>), 3.33 (q, *J* = 7.4 Hz, 2H, CH<sub>3</sub>CH<sub>2</sub>), 1.48 (t, *J* = 7.4 Hz, 3H, CH<sub>3</sub>CH<sub>2</sub>); <sup>13</sup>C NMR (101 MHz, CDCl<sub>3</sub>) δ 162.05, 161.02, 144.91, 139.14, 137.15, 129.95, 128.56, 123.99, 95.34, 28.82, 14.65; HRMS (ESI): *m/z* calcd for C<sub>13</sub>H<sub>14</sub>N<sub>5</sub>S<sub>2</sub> [M+H]<sup>+</sup>, 304.0686; found, 304.0678.

*date for E<sub>15</sub>*: light yellow solid, yield 52%, m.p. 156–157 °C. <sup>1</sup>H NMR (400 MHz, DMSO-*d*<sub>6</sub>) δ 7.86 (s, 1H, pyrazole H), 7.63–7.52 (m, 5H, benzene H), 7.48–7.41 (m, 3H, benzene H), 7.35 (t, *J* = 7.2 Hz, 2H, benzene H), 7.29 (t, *J* = 7.2 Hz, 1H, benzene H), 6.56 (s, 2H, NH<sub>2</sub>), 4.55 (s, 2H, CH<sub>2</sub>); <sup>13</sup>C NMR (101 MHz, DMSO-*d*<sub>6</sub>) δ 162.90, 159.47, 145.84, 140.22, 138.36, 137.06, 129.97, 129.55, 129.06, 128.14, 128.02, 123.94, 95.09, 78.37, 38.34; HRMS (ESI): *m/z* calcd for C<sub>18</sub>H<sub>18</sub>N<sub>5</sub>S<sub>2</sub> [M+H]<sup>+</sup>, 366.0842; found, 366.0837.

*date for E<sub>16</sub>*: white solid, yield 46%, m.p. 131–132 °C. <sup>1</sup>H NMR (400 MHz, DMSO-*d*<sub>6</sub>) δ 7.87 (s, 1H, pyrazole H), 7.64–7.48 (m, 5H, benzene H), 7.46–7.32 (m, 2H, benzene H), 7.27–7.15 (m, 2H, benzene H), 6.56 (s, 2H, NH<sub>2</sub>), 4.56 (s, 2H, CH<sub>2</sub>); <sup>13</sup>C NMR (101 MHz, DMSO-*d*<sub>6</sub>) δ 163.36, 162.11, 159.66, 158.68, 145.88, 140.26, 138.35, 131.91, 131.87, 130.60, 130.51, 129.97, 128.03, 125.09, 125.05, 124.19, 123.96, 116.11, 115.90, 95.08, 32.15; <sup>19</sup>F NMR (376 MHz, DMSO-*d*<sub>6</sub>) δ -116.85 – -116.93 (m); HRMS (ESI): *m/z* calcd for C<sub>18</sub>H<sub>14</sub>FN<sub>5</sub>S<sub>2</sub> [M+H]<sup>+</sup>, 384.0747; found, 384.0746.

*date for E<sub>17</sub>*: white solid, yield 65%, m.p. 135–136 °C. <sup>1</sup>H NMR (400 MHz, DMSO-*d*<sub>6</sub>) δ 7.87 (s, 1H, pyrazole H), 7.61–7.54 (m, 4H, benzene H), 7.45 (t, *J* = 16.0 Hz, 1H, benzene H), 7.38 (d, *J* = 8.0 Hz, 1H, benzene H), 7.32 (t, *J* = 16.0 Hz, 1H, benzene H), 7.04 (d, *J* = 8.0 Hz, 1H, benzene H), 6.92 (t, *J* = 16.0 Hz, 1H, benzene H), 6.55 (s, 2H, NH<sub>2</sub>), 4.47 (s, 2H, CH<sub>2</sub>), 3.82 (s, 3H, OCH<sub>3</sub>); <sup>13</sup>C NMR (101 MHz, DMSO-*d*<sub>6</sub>) δ 162.89, 160.00, 157.63, 145.80, 140.24, 138.33, 130.90, 130.01, 129.98, 128.04, 124.45, 123.93, 120.80, 111.57, 95.11, 56.01, 33.88; HRMS (ESI): *m/z* calcd for C<sub>19</sub>H<sub>18</sub>N<sub>5</sub>OS<sub>2</sub>

$[M+H]^+$ , 396.0947; found, 396.0947.

*date for E<sub>18</sub>*: yellow solid, yield 81%, m.p. 157–158 °C. <sup>1</sup>H NMR (400 MHz, DMSO-*d*<sub>6</sub>) δ 7.86 (s, 1H, pyrazole H), 7.57 (dt, *J* = 15.6, 7.7 Hz, 4H, benzene H), 7.47–7.34 (m, 2H, benzene H), 7.32–7.26 (m, 2H, benzene H), 7.12 (t, *J* = 9.9 Hz, 1H, benzene H), 6.55 (s, 2H, NH<sub>2</sub>), 4.56 (s, 2H, CH<sub>2</sub>); <sup>13</sup>C NMR (101 MHz, DMSO-*d*<sub>6</sub>) δ 163.08, 159.13, 145.83, 140.24, 138.30, 131.04, 130.95, 129.99, 128.06, 125.66, 123.95, 116.36, 116.14, 115.08, 114.87, 95.04, 37.56; <sup>19</sup>F NMR (376 MHz, DMSO-*d*<sub>6</sub>) δ -112.92 – -113.04 (m); HRMS (ESI): *m/z* calcd for C<sub>18</sub>H<sub>15</sub>FN<sub>5</sub>S<sub>2</sub>  $[M+H]^+$ , 384.0747; found, 384.0744.

*date for E<sub>19</sub>*: white solid, yield 80%, m.p. 140–141 °C. <sup>1</sup>H NMR (400 MHz, DMSO-*d*<sub>6</sub>) δ 7.87 (s, 1H, pyrazole H), 7.67 (d, *J* = 7.9 Hz, 1H, benzene H), 7.57 (dt, *J* = 15.7, 7.9 Hz, 5H, benzene H), 7.43 (t, *J* = 7.1 Hz, 1H, benzene H), 7.36 (t, *J* = 8.1 Hz, 1H, benzene H), 7.26 (t, *J* = 8.5 Hz, 1H, benzene H), 6.56 (s, 2H, NH<sub>2</sub>), 4.61 (s, 2H, CH<sub>2</sub>); <sup>13</sup>C NMR (101 MHz, DMSO-*d*<sub>6</sub>) δ 163.32, 158.70, 145.85, 140.28, 138.29, 136.05, 133.41, 132.01, 130.51, 129.99, 128.51, 128.07, 124.57, 123.95, 95.06; HRMS (ESI): *m/z* calcd for C<sub>18</sub>H<sub>15</sub>BrN<sub>5</sub>S<sub>2</sub>  $[M+H]^+$ , 443.9947; found, 443.9943.

*date for E<sub>20</sub>*: white solid, yield 80%, m.p. 146–147 °C. <sup>1</sup>H NMR (400 MHz, DMSO-*d*<sub>6</sub>) δ 7.86 (s, 1H, pyrazole H), 7.68 (s, 1H, benzene H), 7.60–7.53 (m, 4H, benzene H), 7.45 (dt, *J* = 12.4, 7.5 Hz, 3H, benzene H), 7.30 (t, *J* = 7.8 Hz, 1H, benzene H), 6.55 (s, 2H, NH<sub>2</sub>), 4.55 (s, 2H, CH<sub>2</sub>); <sup>13</sup>C NMR (101 MHz, DMSO-*d*<sub>6</sub>) δ 163.08, 159.05, 145.84, 140.25, 140.20, 138.32, 132.19, 131.16, 130.94, 129.98, 128.62, 128.04, 123.95, 122.09, 95.05, 37.35; HRMS (ESI): *m/z* calcd for C<sub>18</sub>H<sub>15</sub>BrN<sub>5</sub>S<sub>2</sub>  $[M+H]^+$ , 443.9947; found, 443.9947.

*date for E<sub>21</sub>*: white solid, yield 56%, m.p. 166–167 °C. <sup>1</sup>H NMR (400 MHz, DMSO-*d*<sub>6</sub>) δ 7.86 (s, 1H, pyrazole H), 7.61–7.53 (m, 6H, benzene H), 7.53–7.39 (m, 3H, benzene H), 6.55 (s, 2H, NH<sub>2</sub>), 4.52 (s, 2H, CH<sub>2</sub>); <sup>13</sup>C NMR (101 MHz, DMSO-*d*<sub>6</sub>) δ 163.04, 159.11, 145.83, 140.25, 138.32, 136.87, 131.92, 131.73, 129.98, 128.05, 123.94, 121.25, 95.06, 37.47; HRMS (ESI): *m/z* calcd for C<sub>18</sub>H<sub>15</sub>BrN<sub>5</sub>S<sub>2</sub>  $[M+H]^+$ , 443.9947; found, 443.9945.

*date for E<sub>22</sub>*: yellow solid, yield 72%, m.p. 113–114 °C. <sup>1</sup>H NMR (400 MHz, DMSO-*d*<sub>6</sub>) δ 7.88 (s, 1H, pyrazole H), 7.58 (dt, *J* = 13.4, 6.7 Hz, 4H, benzene H), 7.45 (t, *J* = 7.2 Hz, 1H, benzene H), 6.56 (s, 2H, NH<sub>2</sub>), 3.19 (d, *J* = 6.8 Hz, 2H, CH<sub>2</sub>), 2.04–1.96 (m, 1H, CH (CH<sub>3</sub>)<sub>2</sub>), 1.03–1.01 (d, *J* = 8.0 Hz, 6H, CH (CH<sub>3</sub>)<sub>2</sub>); <sup>13</sup>C NMR (101 MHz, DMSO-*d*<sub>6</sub>) δ 162.40, 160.66, 145.79, 140.21, 138.38, 129.96, 127.99, 123.89, 95.12, 42.82, 28.60, 21.89; HRMS (ESI): *m/z* calcd for C<sub>15</sub>H<sub>18</sub>N<sub>5</sub>S<sub>2</sub>  $[M+H]^+$ , 322.0998;

found, 322.0996.

*date for E<sub>23</sub>*: yellow solid, yield 73%, m.p. 116–117 °C. <sup>1</sup>H NMR (400 MHz, CDCl<sub>3</sub>) δ 7.61 (s, 1H, pyrazole H), 7.60 (d, *J* = 8.5 Hz, 2H, benzene H), 7.54 (t, *J* = 7.8 Hz, 2H, benzene H), 7.42 (t, *J* = 7.3 Hz, 1H, benzene H), 5.65 (s, 2H, NH<sub>2</sub>), 3.30 (t, *J* = 12.0 Hz, 2H, CH<sub>2</sub>), 1.90–1.81 (m, 2H, CH<sub>2</sub>CH<sub>3</sub>), 1.07 (t, *J* = 7.4 Hz, 3H, CH<sub>2</sub>CH<sub>3</sub>); <sup>13</sup>C NMR (101 MHz, CDCl<sub>3</sub>) δ 162.10, 160.90, 144.67, 139.35, 137.62, 129.82, 128.19, 123.75, 95.52, 36.22, 22.72, 13.34; HRMS (ESI): *m/z* calcd for C<sub>14</sub>H<sub>16</sub>N<sub>5</sub>S<sub>2</sub> [M+H]<sup>+</sup>, 318.0842; found, 318.0841.

*date for E<sub>24</sub>*: light yellow solid, yield 60%, m.p. 200–201 °C. <sup>1</sup>H NMR (400 MHz, CDCl<sub>3</sub>) δ 8.21 (d, *J* = 12.0 Hz, 2H, benzene H), 7.64 (s, 1H, pyrazole H), 7.62 (d, *J* = 4.0 Hz, 2H, benzene H), 7.59–7.52 (m, 4H, benzene H), 7.45–7.41 (m, 1H, benzene H), 5.64 (s, 2H, NH<sub>2</sub>), 4.61 (s, 2H, CH<sub>2</sub>); <sup>13</sup>C NMR (101 MHz, CDCl<sub>3</sub>) δ 163.07, 158.26, 147.43, 144.77, 144.08, 139.42, 137.55, 130.02, 129.92, 128.38, 123.96, 123.85, 95.36, 37.19; HRMS (ESI): *m/z* calcd for C<sub>18</sub>H<sub>15</sub>N<sub>6</sub>O<sub>2</sub>S<sub>2</sub> [M+H]<sup>+</sup>, 411.0692; found, 411.0686.

*date for E<sub>25</sub>*: white solid, yield 44%, m.p. 162–163 °C. <sup>1</sup>H NMR (400 MHz, CDCl<sub>3</sub>) δ 8.10 (d, *J* = 8.2 Hz, 1H, pyrazole H), 7.74 (d, *J* = 7.7 Hz, 1H, benzene H), 7.57 (d, *J* = 7.4 Hz, 4H, benzene H), 7.53 (t, *J* = 7.3 Hz, 2H, benzene H), 7.47–7.38 (m, 2H, benzene H), 5.64 (s, 2H, NH<sub>2</sub>), 4.88 (s, 2H, CH<sub>2</sub>); <sup>13</sup>C NMR (101 MHz, CDCl<sub>3</sub>) δ 162.92, 159.48, 147.85, 144.71, 139.43, 137.60, 133.84, 133.00, 132.83, 129.87, 129.07, 128.28, 125.61, 123.79, 95.45, 35.40; HRMS (ESI): *m/z* calcd for C<sub>18</sub>H<sub>15</sub>N<sub>6</sub>O<sub>2</sub>S<sub>2</sub> [M+H]<sup>+</sup>, 411.0692; found, 411.0686.

*date for E<sub>26</sub>*: light yellow solid, yield 83%, m.p. 176–177 °C. <sup>1</sup>H NMR (400 MHz, CDCl<sub>3</sub>) δ 8.32 (s, 1H, pyrazole H), 8.14 (dd, *J* = 8.2, 2.2 Hz, 1H, benzene H), 7.80 (d, *J* = 7.4 Hz, 1H, benzene H), 7.62–7.46 (m, 6H, benzene H), 7.42 (t, *J* = 7.2 Hz, 1H, benzene H), 5.64 (s, 2H, NH<sub>2</sub>), 4.62 (s, 2H, CH<sub>2</sub>); <sup>13</sup>C NMR (101 MHz, CDCl<sub>3</sub>) δ 162.51, 160.05, 144.77, 139.41, 138.55, 137.67, 135.70, 129.86, 128.75, 128.69, 128.25, 126.21, 123.83, 95.55, 38.62, 21.39; HRMS (ESI): *m/z* calcd for C<sub>19</sub>H<sub>15</sub>N<sub>5</sub>O<sub>2</sub>S<sub>2</sub> [M+H]<sup>+</sup>, 411.0692; found, 380.0691.

*date for E<sub>27</sub>*: white solid, yield 66%, m.p. 168–169 °C. <sup>1</sup>H NMR (400 MHz, CDCl<sub>3</sub>) δ 7.61 (s, 1H, pyrazole H), 7.59 (d, *J* = 8.5 Hz, 2H, benzene H), 7.53 (t, *J* = 7.8 Hz, 2H, benzene H), 7.42 (t, *J* = 7.3 Hz, 1H, benzene H), 5.66 (s, 2H, NH<sub>2</sub>) 2.78 (s, 3H, CH<sub>3</sub>); <sup>13</sup>C NMR (101 MHz, CDCl<sub>3</sub>) δ 161.97, 161.65, 144.68, 139.30, 137.61, 129.80, 128.18, 123.74, 95.45, 16.48; HRMS (ESI): *m/z* calcd for



C<sub>12</sub>H<sub>12</sub>N<sub>5</sub>S<sub>2</sub> [M+H]<sup>+</sup>, 290.0529; found, 290.0531.

*date for E<sub>28</sub>*: white solid, yield 73%, m.p. 122–123 °C. <sup>1</sup>H NMR (500 MHz, DMSO-*d*<sub>6</sub>) δ 7.87 (s, 1H, pyrazole H), 7.57 (d, *J* = 20.9 Hz, 4H, benzene H), 7.44 (s, 1H, benzene H), 6.53 (s, 2H, NH<sub>2</sub>), 3.26 (s, 2H, SCH<sub>2</sub>), 1.72 (s, 2H, CH<sub>2</sub>(CH<sub>2</sub>)<sub>2</sub>CH<sub>3</sub>), 1.35 (d, *J* = 33.5 Hz, 2H, CH<sub>2</sub>CH<sub>2</sub>CH<sub>2</sub>CH<sub>3</sub>), 1.35 (d, *J* = 33.5 Hz, 2H, CH<sub>2</sub>CH<sub>2</sub>CH<sub>2</sub>CH<sub>3</sub>), 0.86 (s, 3H, CH<sub>2</sub>CH<sub>2</sub>CH<sub>2</sub>CH<sub>3</sub>); <sup>13</sup>C NMR (101 MHz, DMSO-*d*<sub>6</sub>) δ 162.05, 159.99, 145.41, 139.81, 138.01, 129.55, 127.58, 123.51, 94.76, 34.11, 30.25, 28.67, 21.68, 13.90; HRMS (ESI): *m/z* calcd for C<sub>16</sub>H<sub>20</sub>N<sub>5</sub>S<sub>2</sub> [M+H]<sup>+</sup>, 346.1154; found, 346.1154.

## 6. Copies of Intermediates and Title Compounds

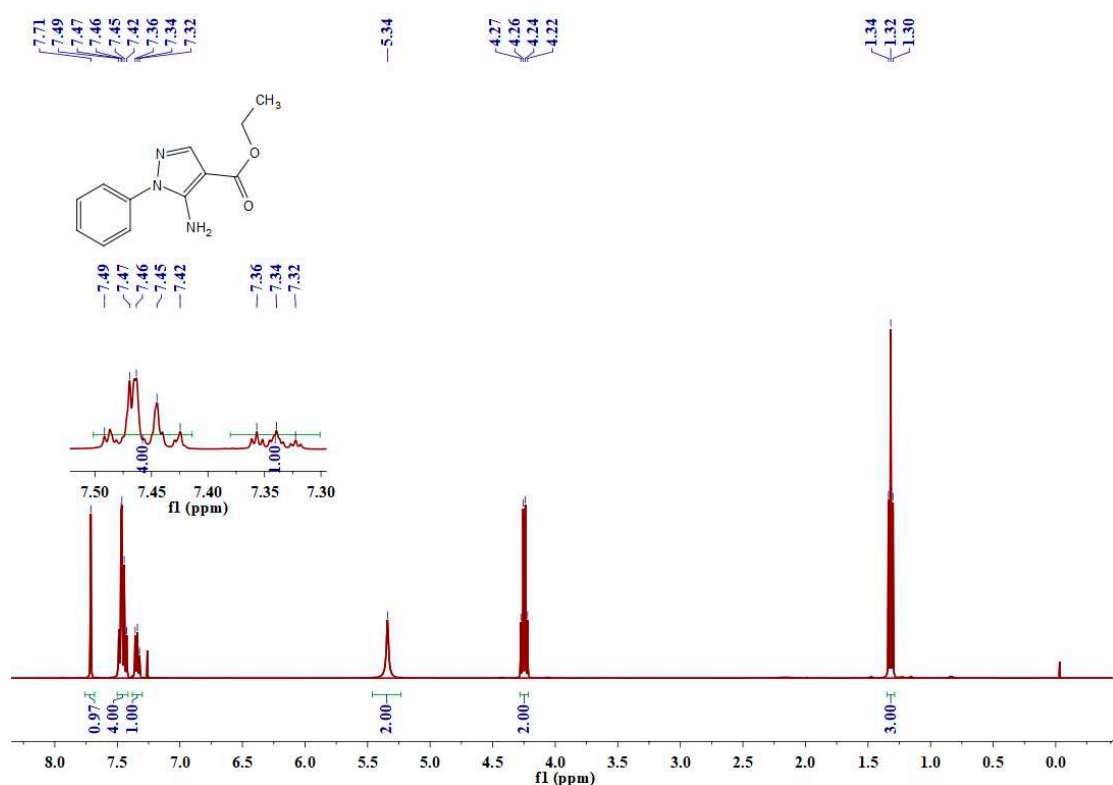

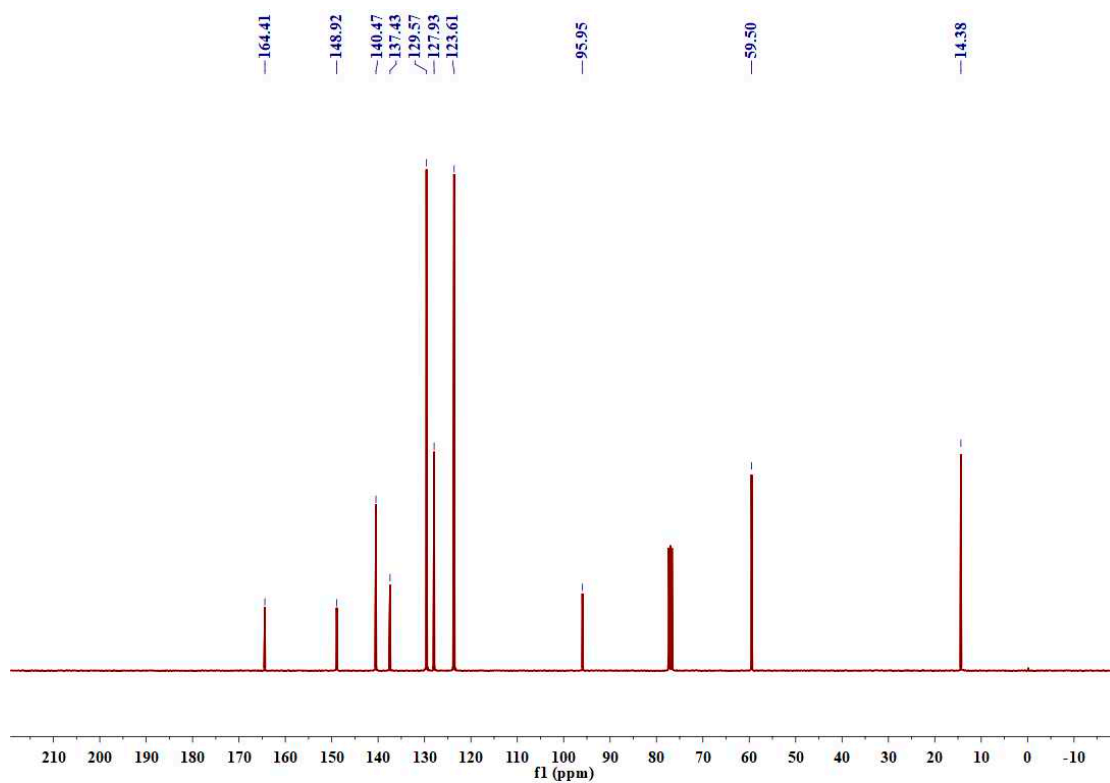

93 #33 RT: 0.33 AV: 1 NL: 8.69E+008  
T: FTMS + p ESI Full ms [150.0000-2200.0000]

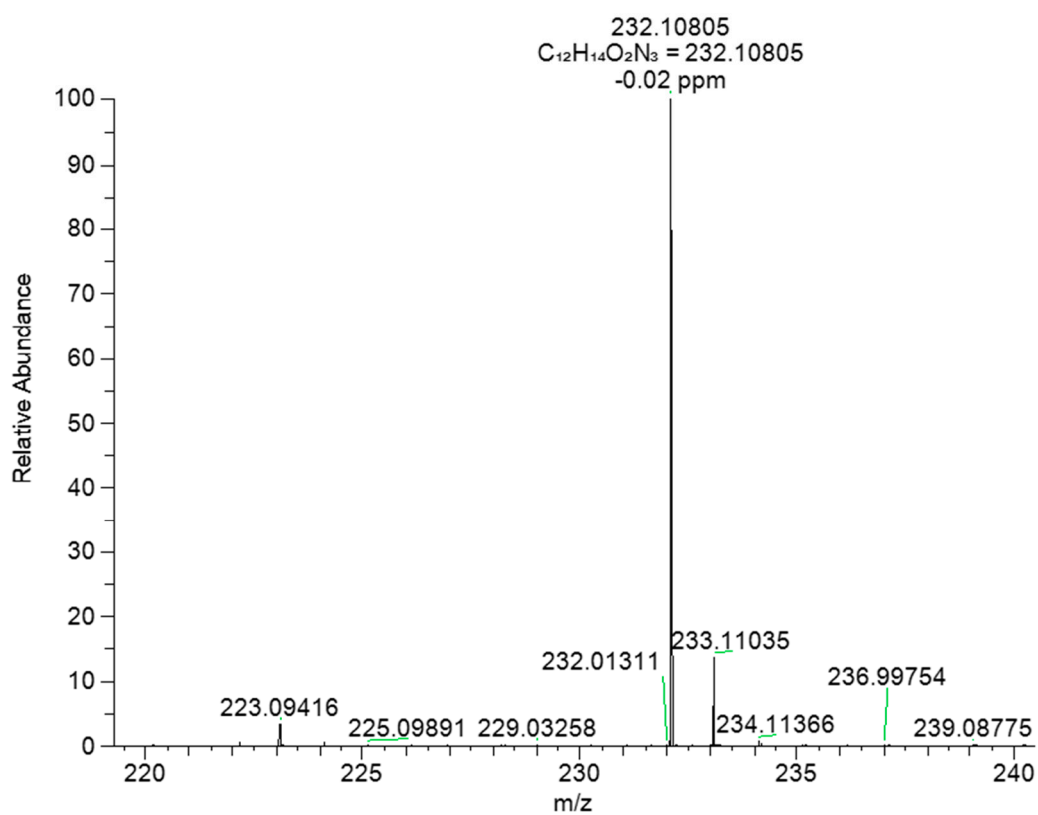

**Figure S3.**  $^1H$  NMR,  $^{13}C$  NMR, HRMS for intermediate **B**.

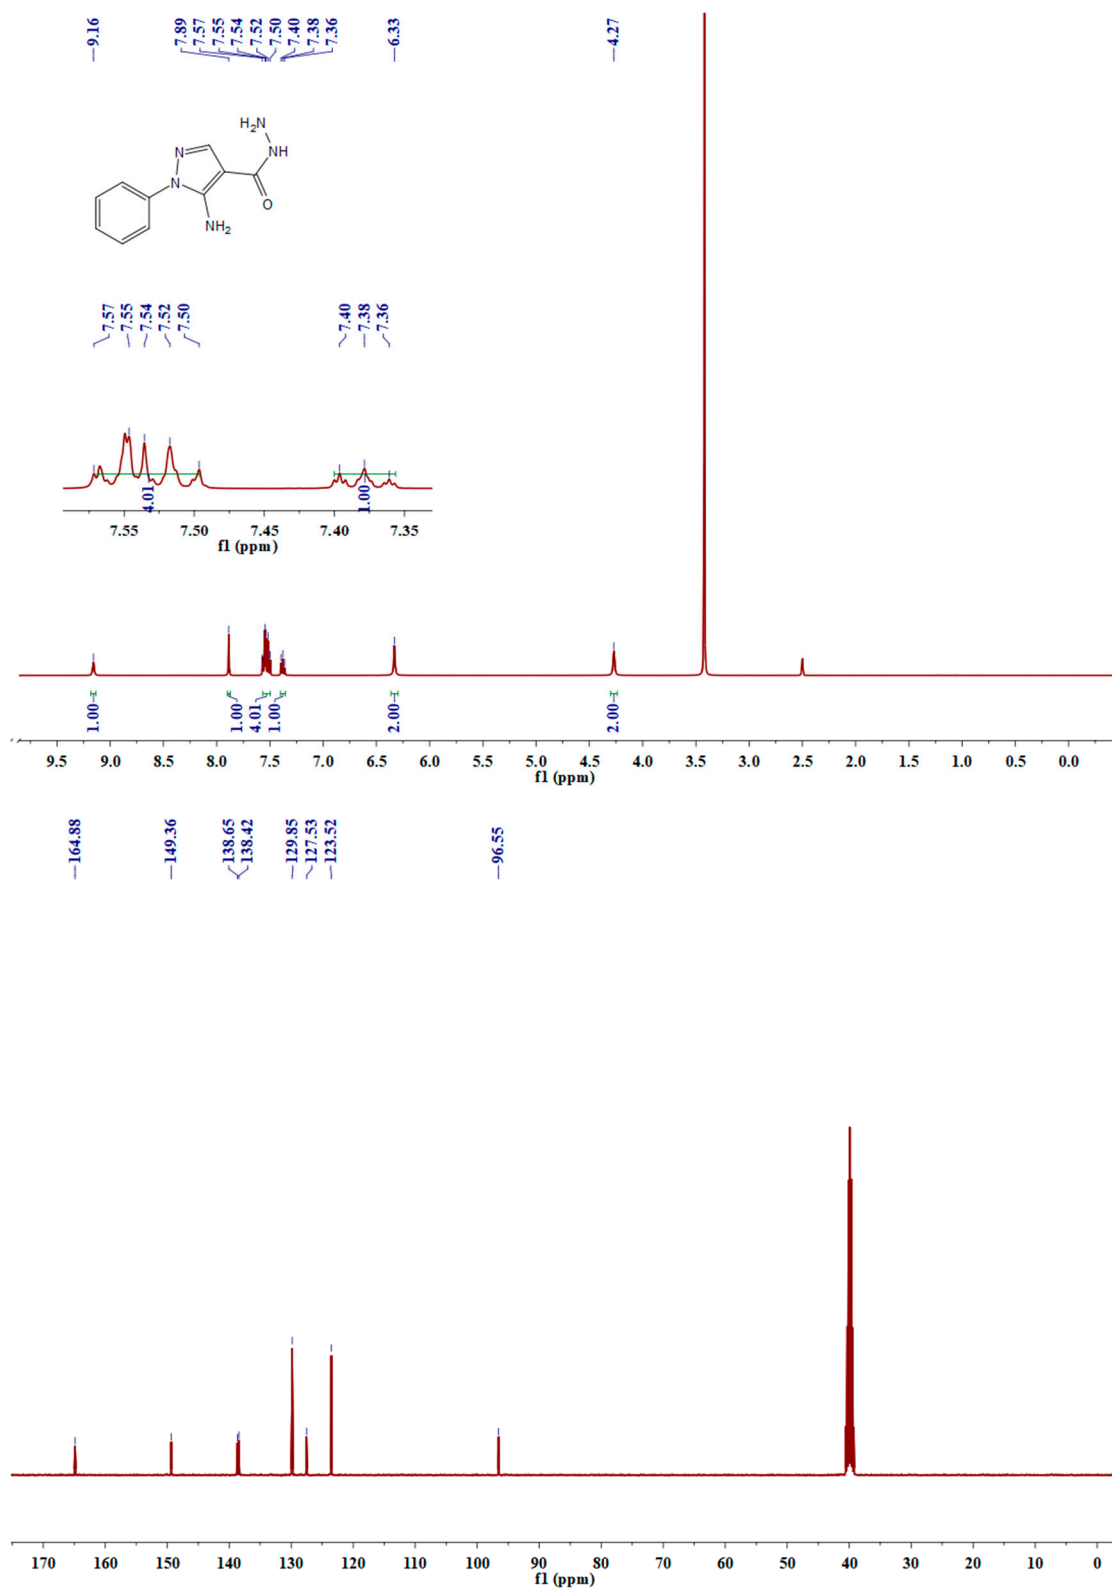

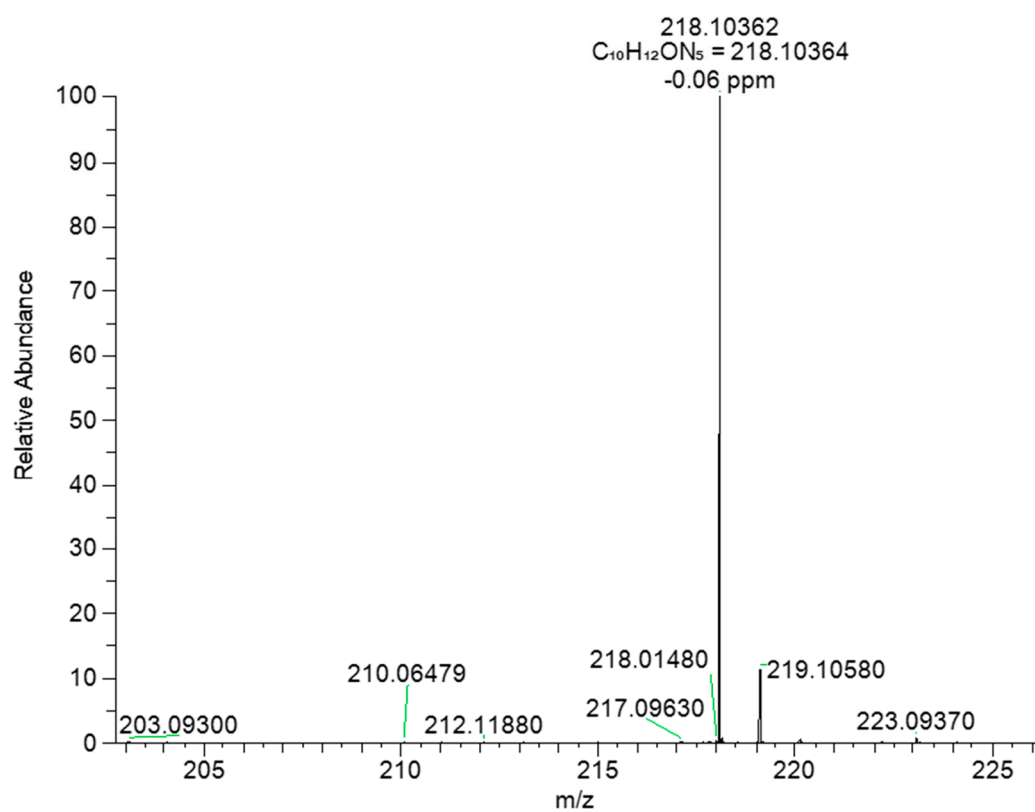

**Figure S4.**  $^1H$  NMR,  $^{13}C$  NMR, HRMS for intermediate C.

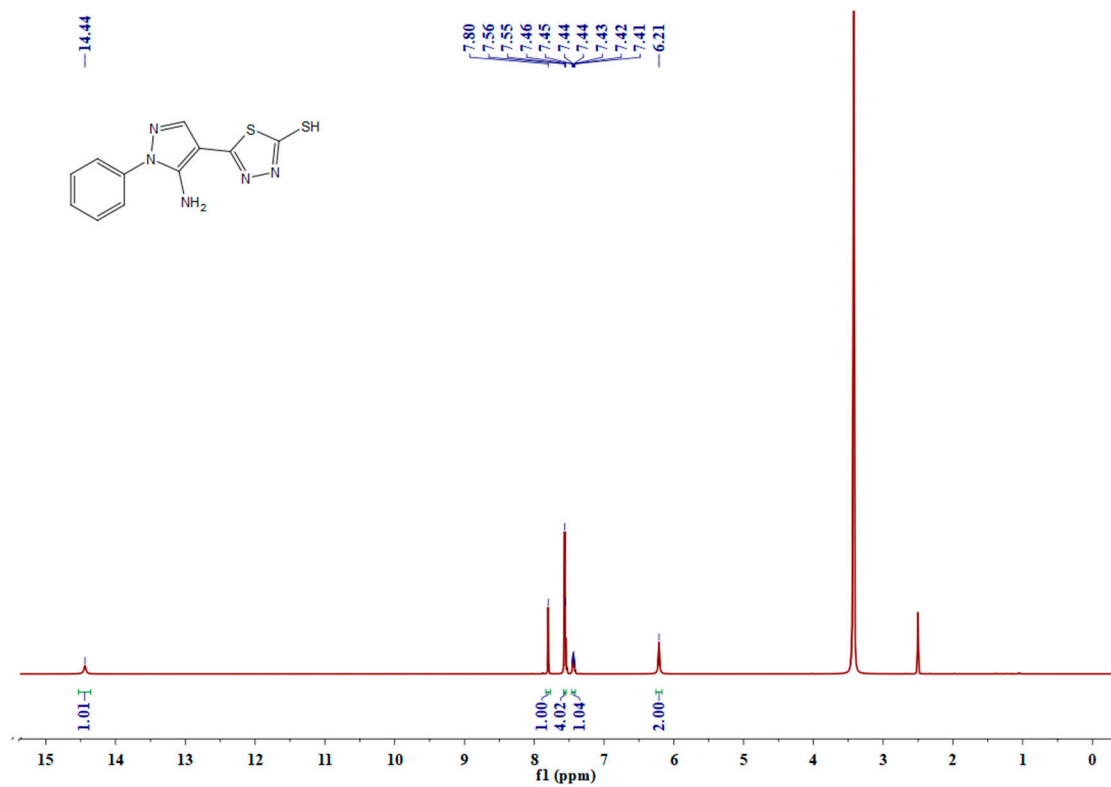

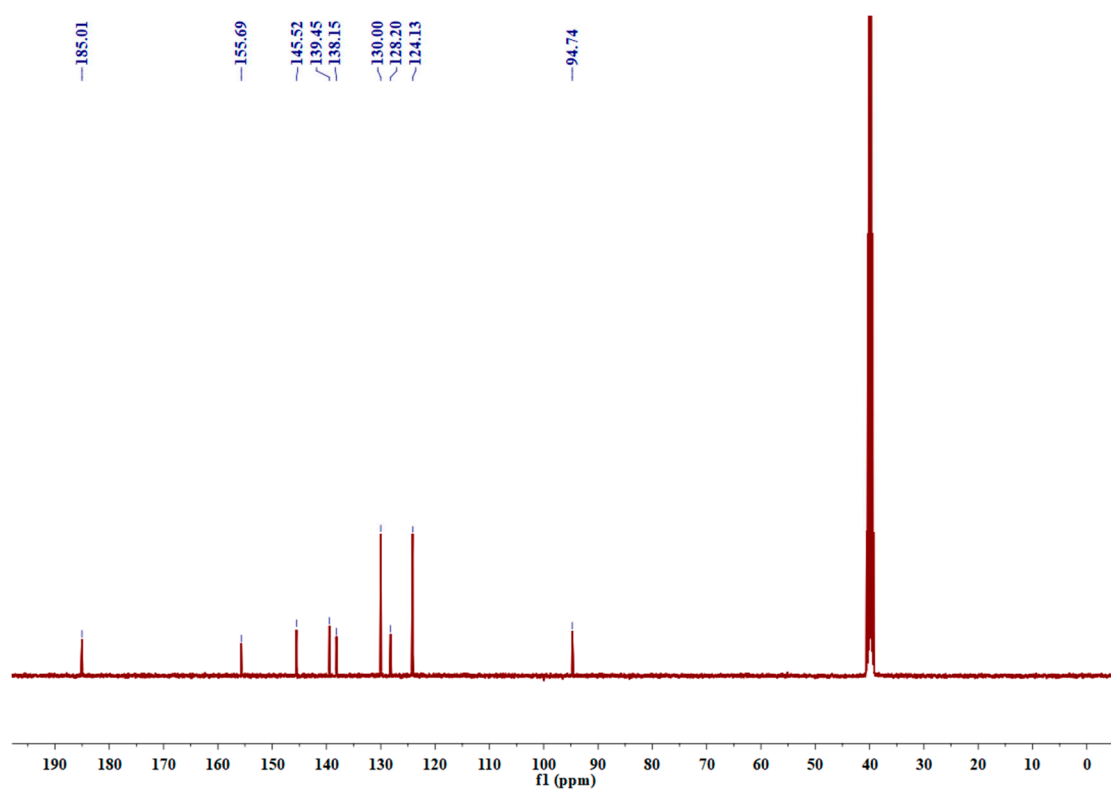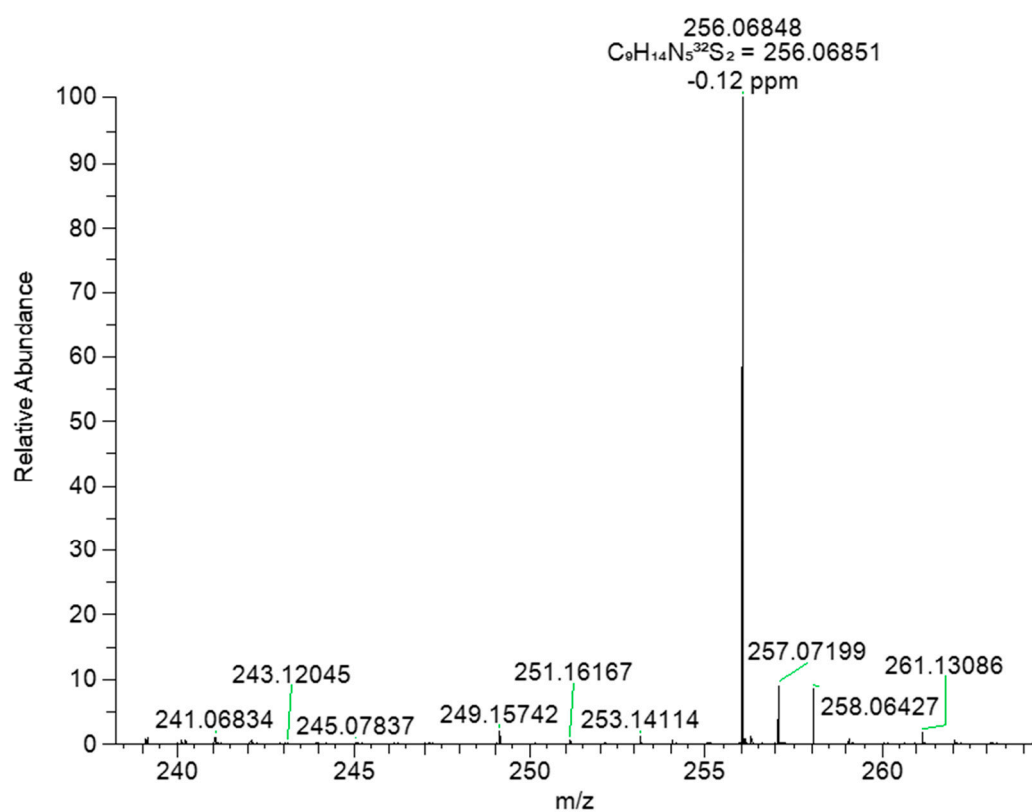

**Figure S5.** <sup>1</sup>H NMR, <sup>13</sup>C NMR, HRMS for intermediate **D**.

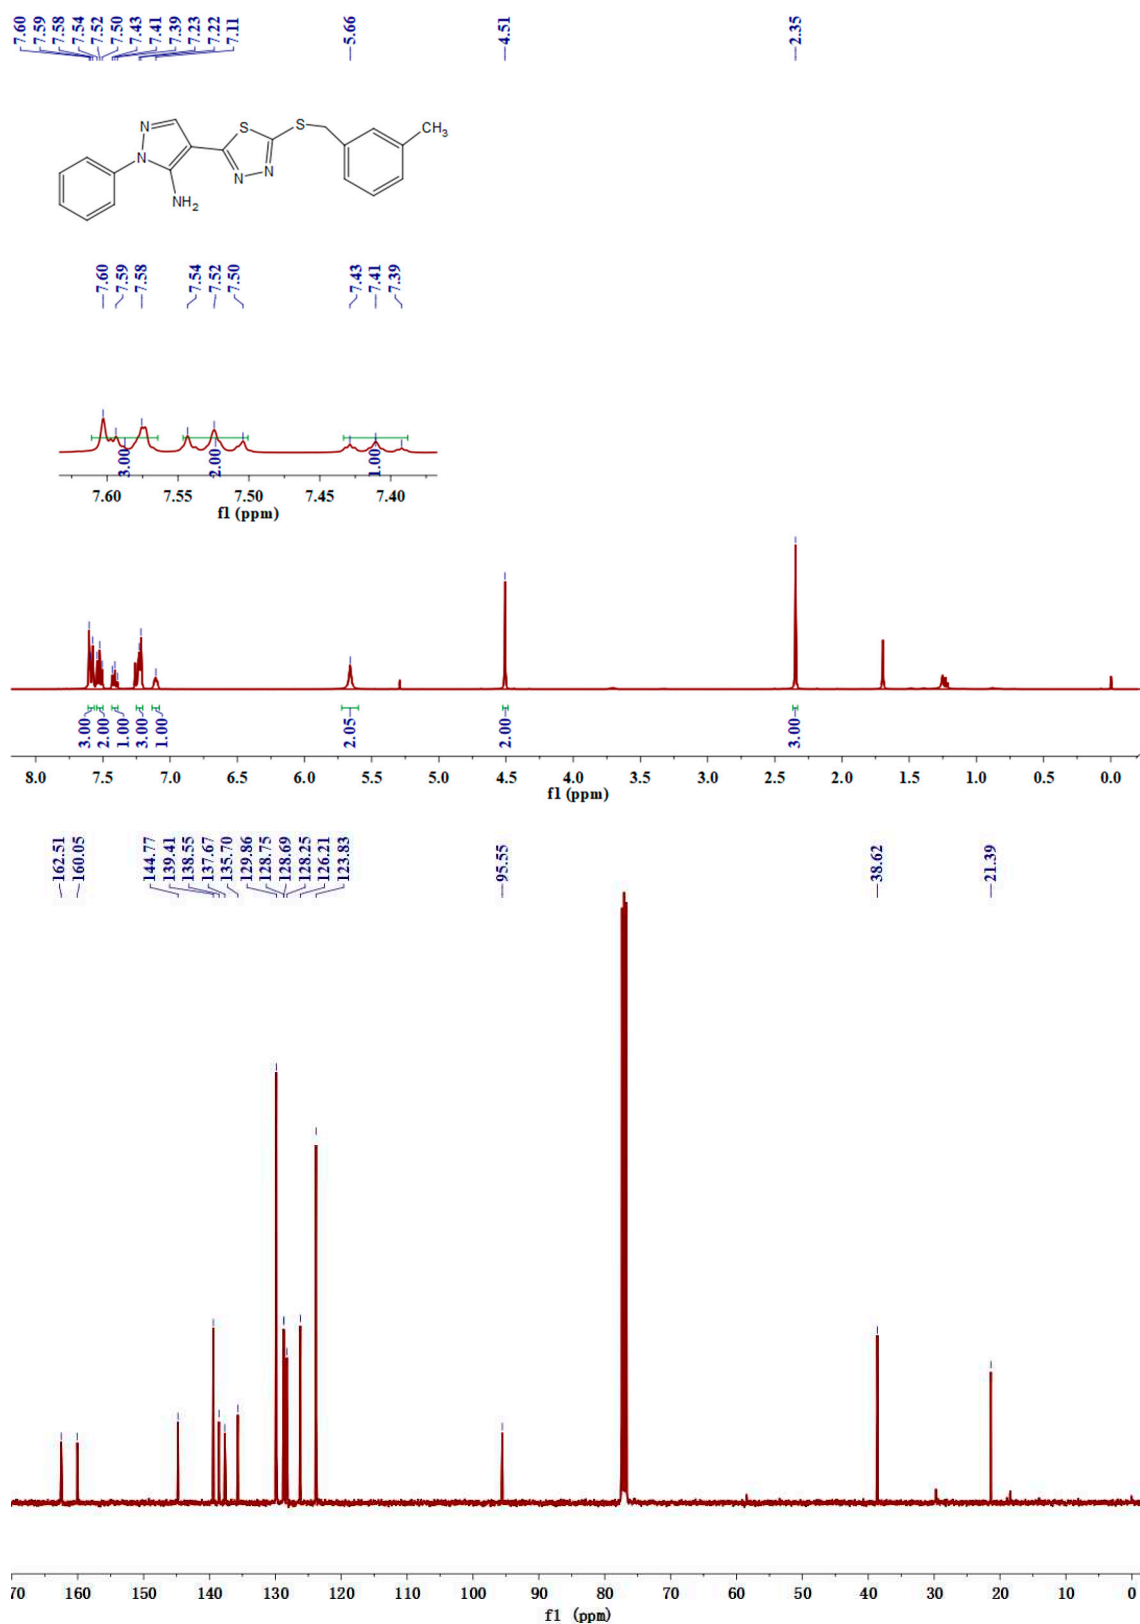

201907286 #57 RT: 0.55 AV: 1 NL: 7.21E7  
T: FTMS+pESI Full ms [100.0000-1000.0000]

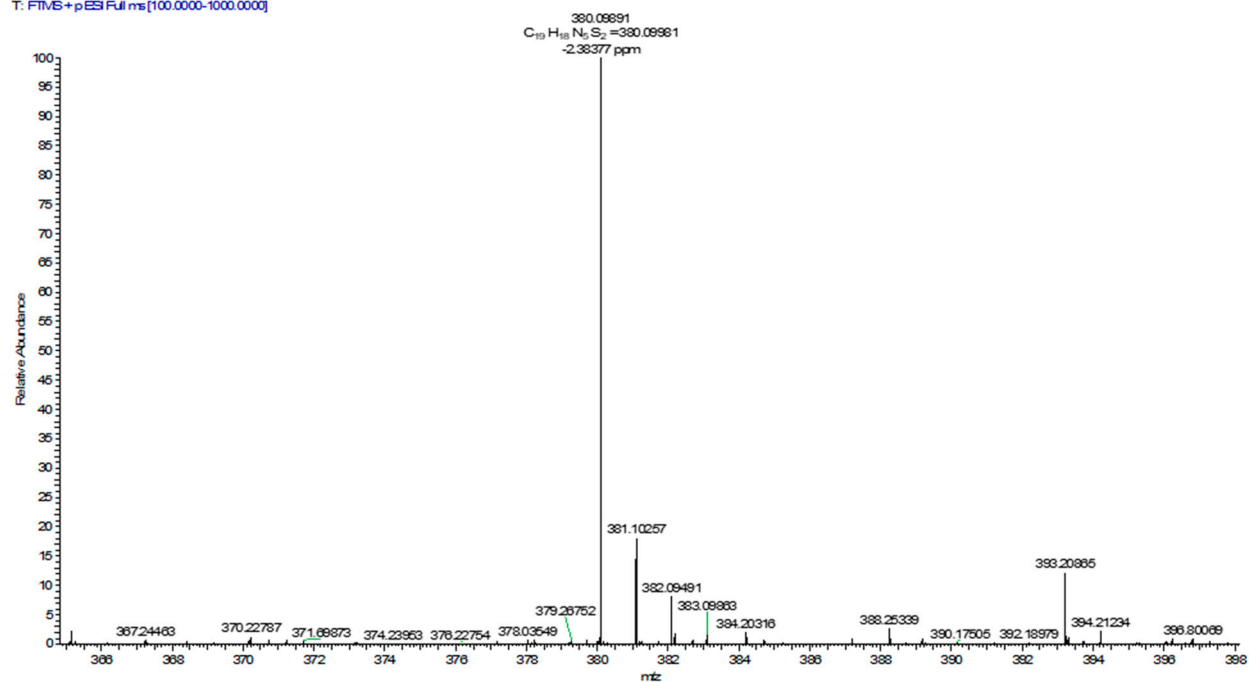

Figure S6.  $^1\text{H}$  NMR,  $^{13}\text{C}$  NMR and HRMS for title compound E1.

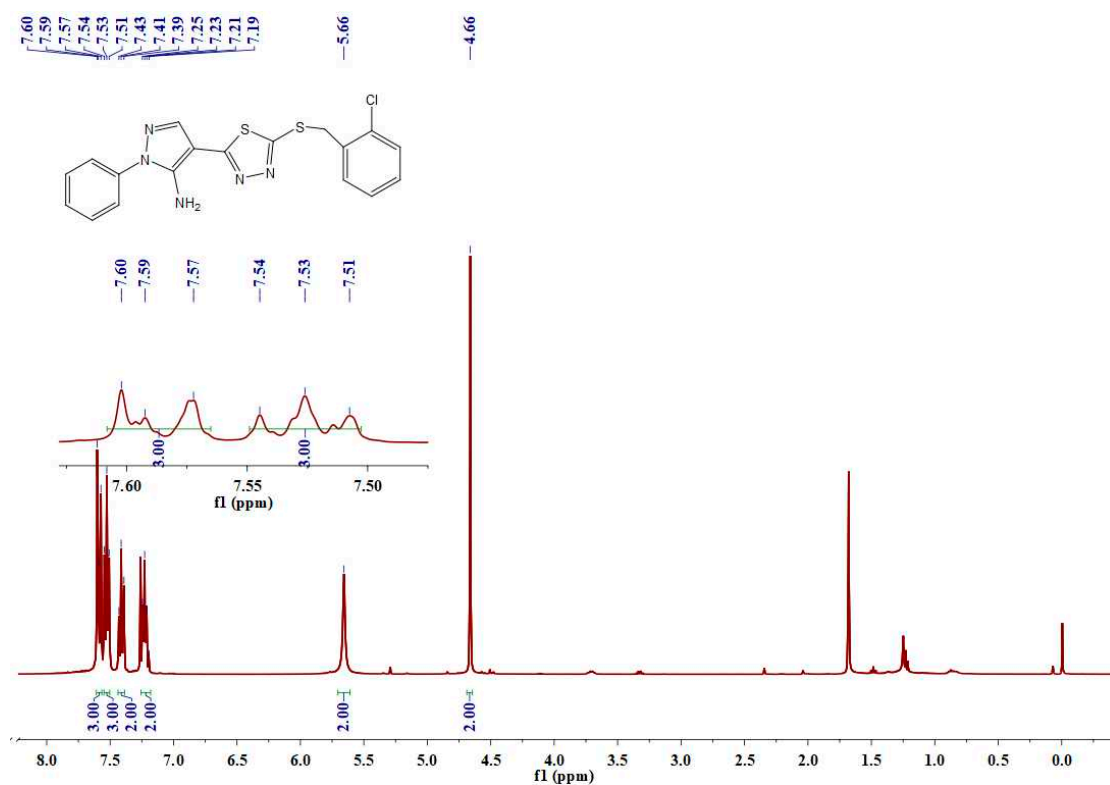

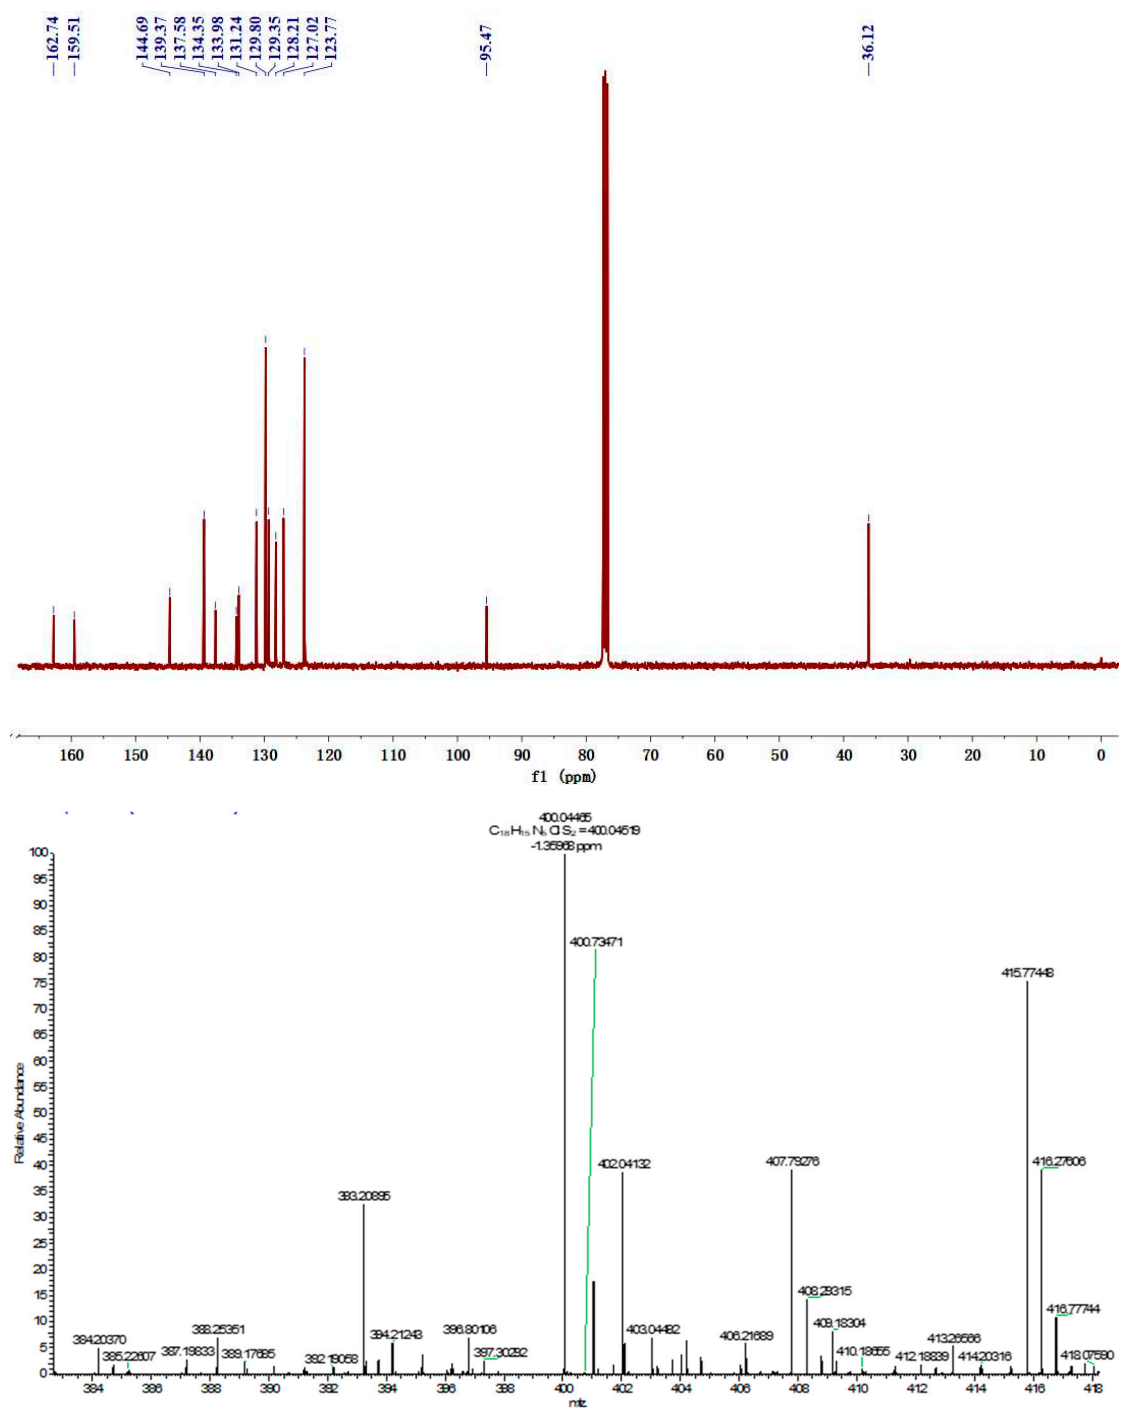

**Figure S7.** <sup>1</sup>H NMR, <sup>13</sup>C NMR and HRMS for title compound E2.



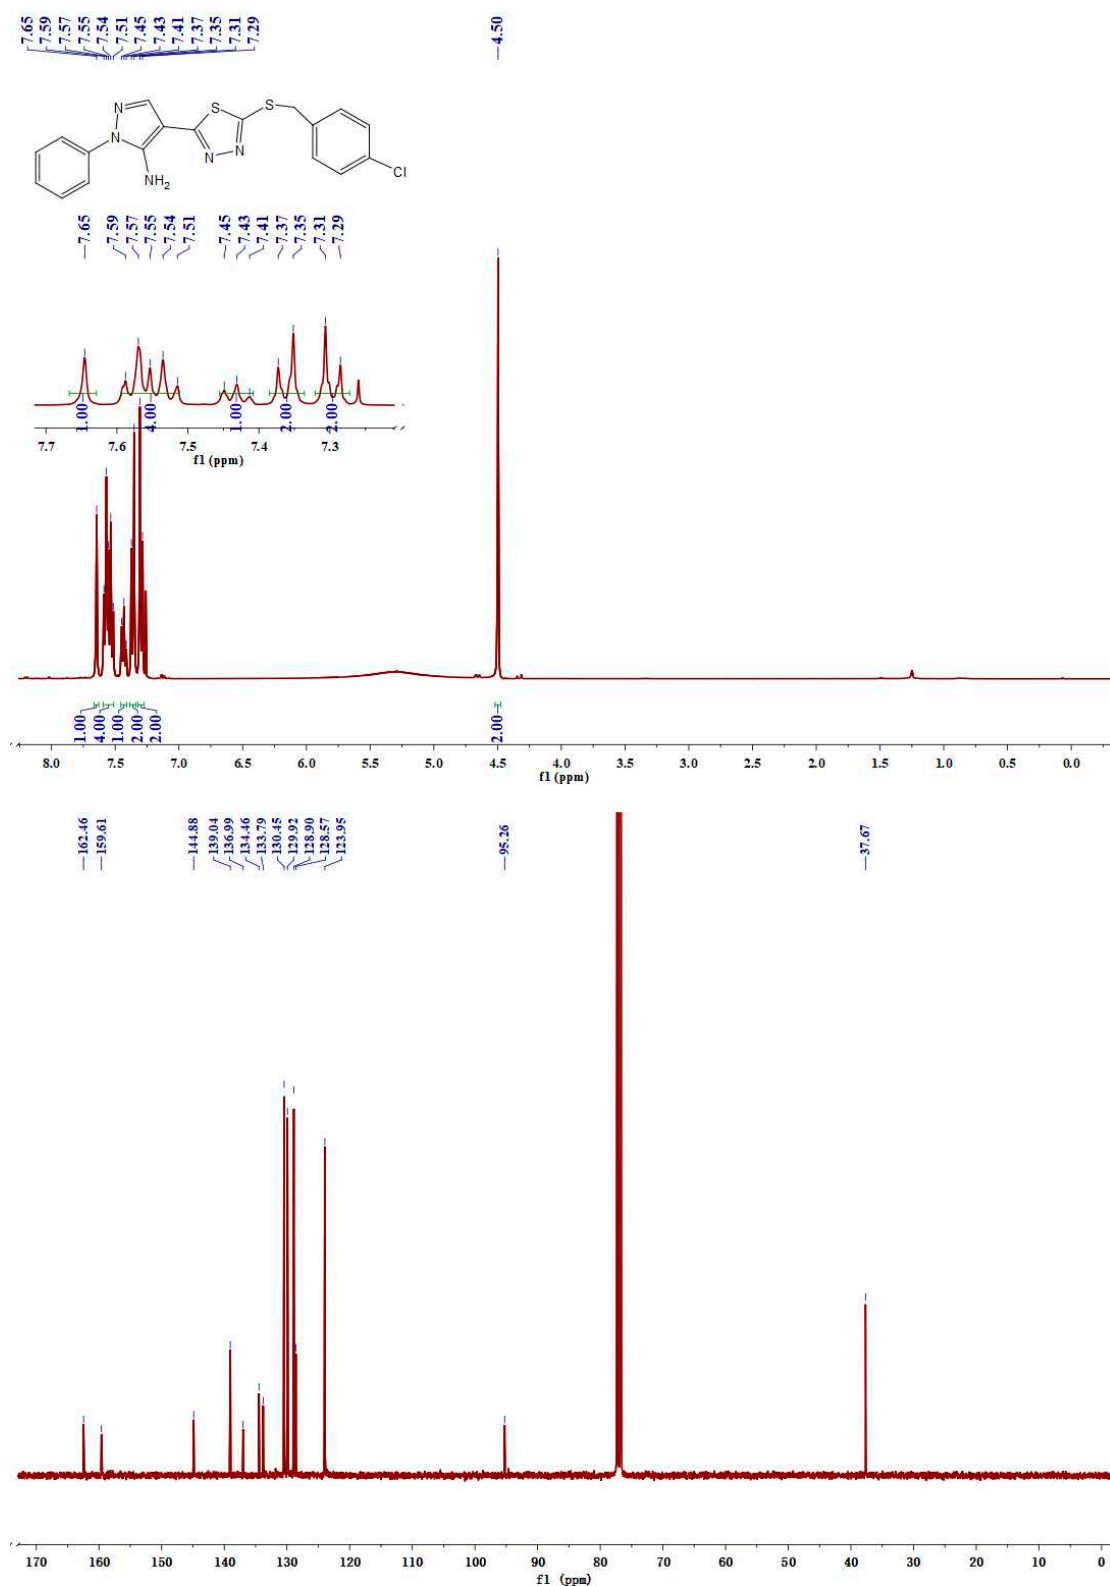

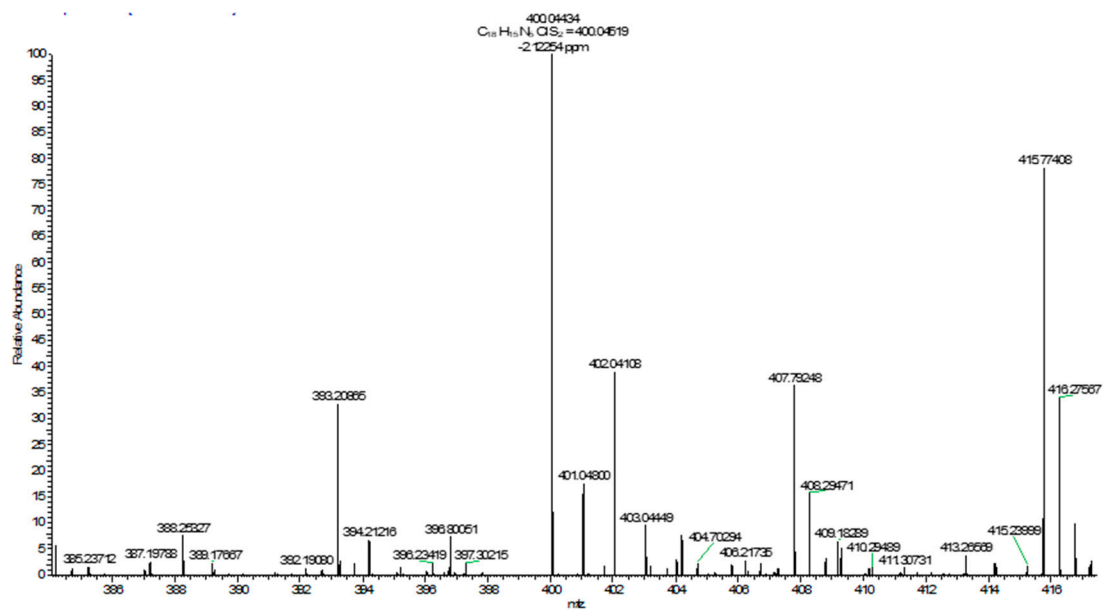

**Figure S8.**  $^1H$  NMR,  $^{13}C$  NMR and HRMS for title compound E<sub>3</sub>.

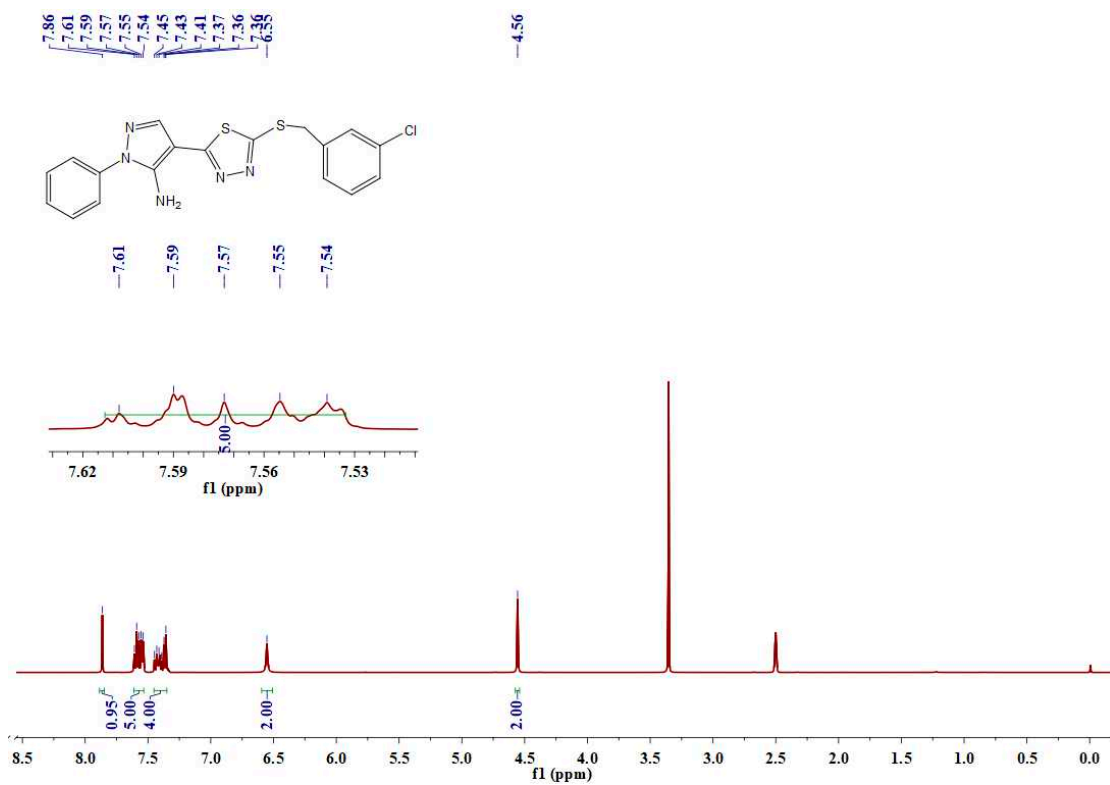

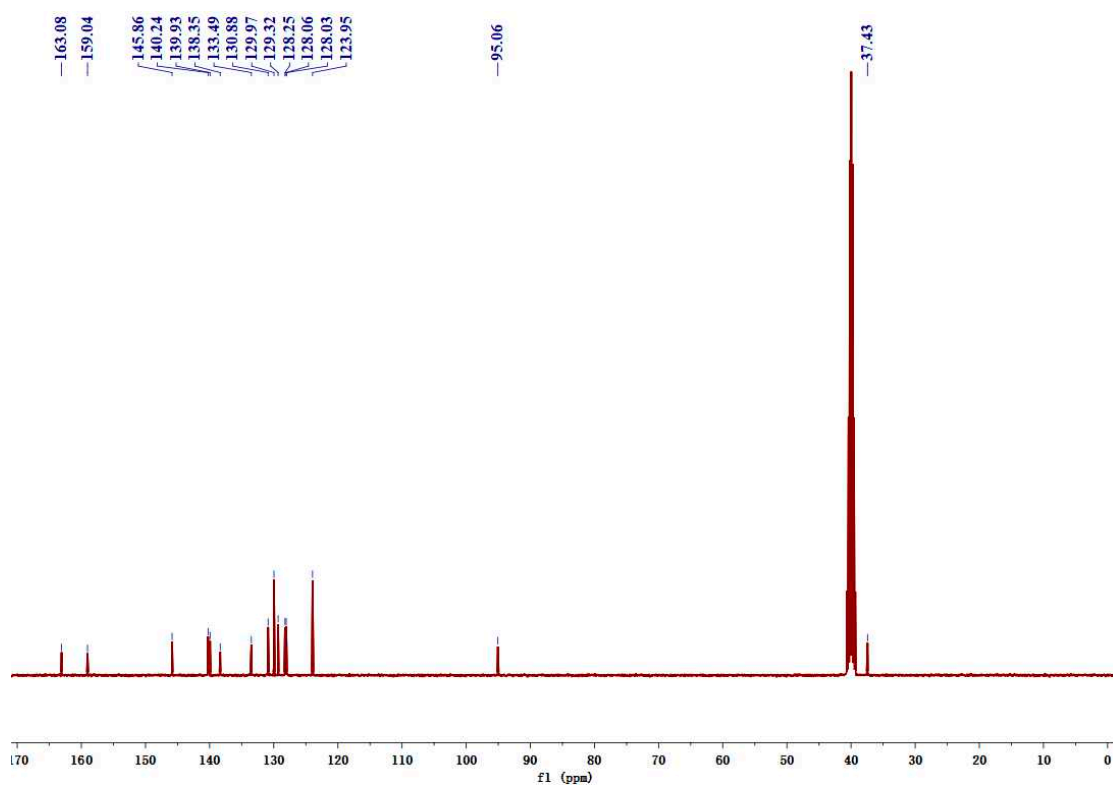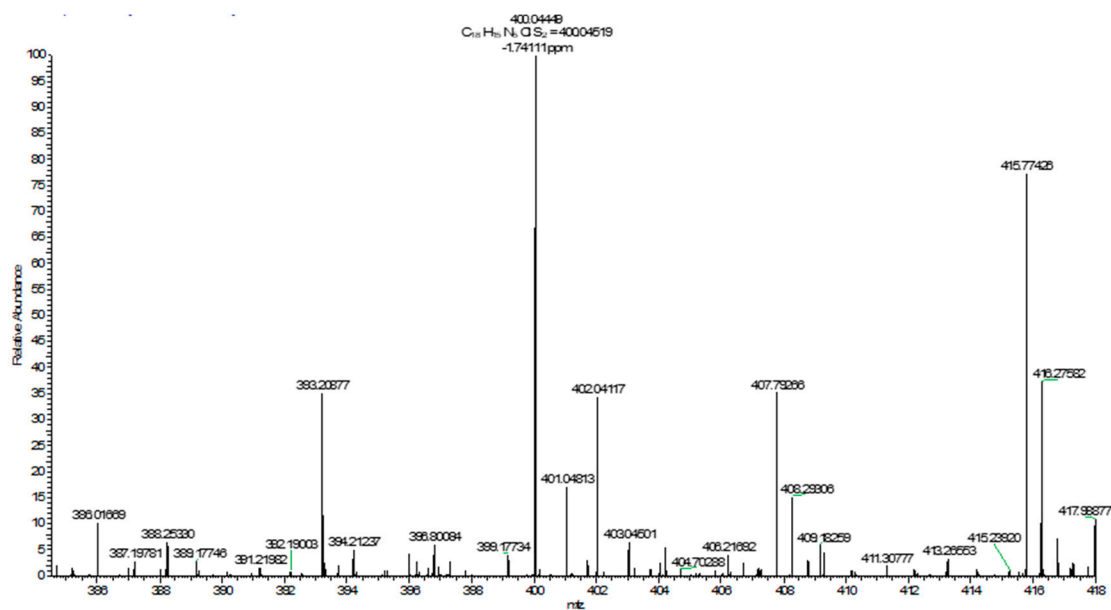

Figure S9. <sup>1</sup>H NMR, <sup>13</sup>C NMR and HRMS for title compound E4.

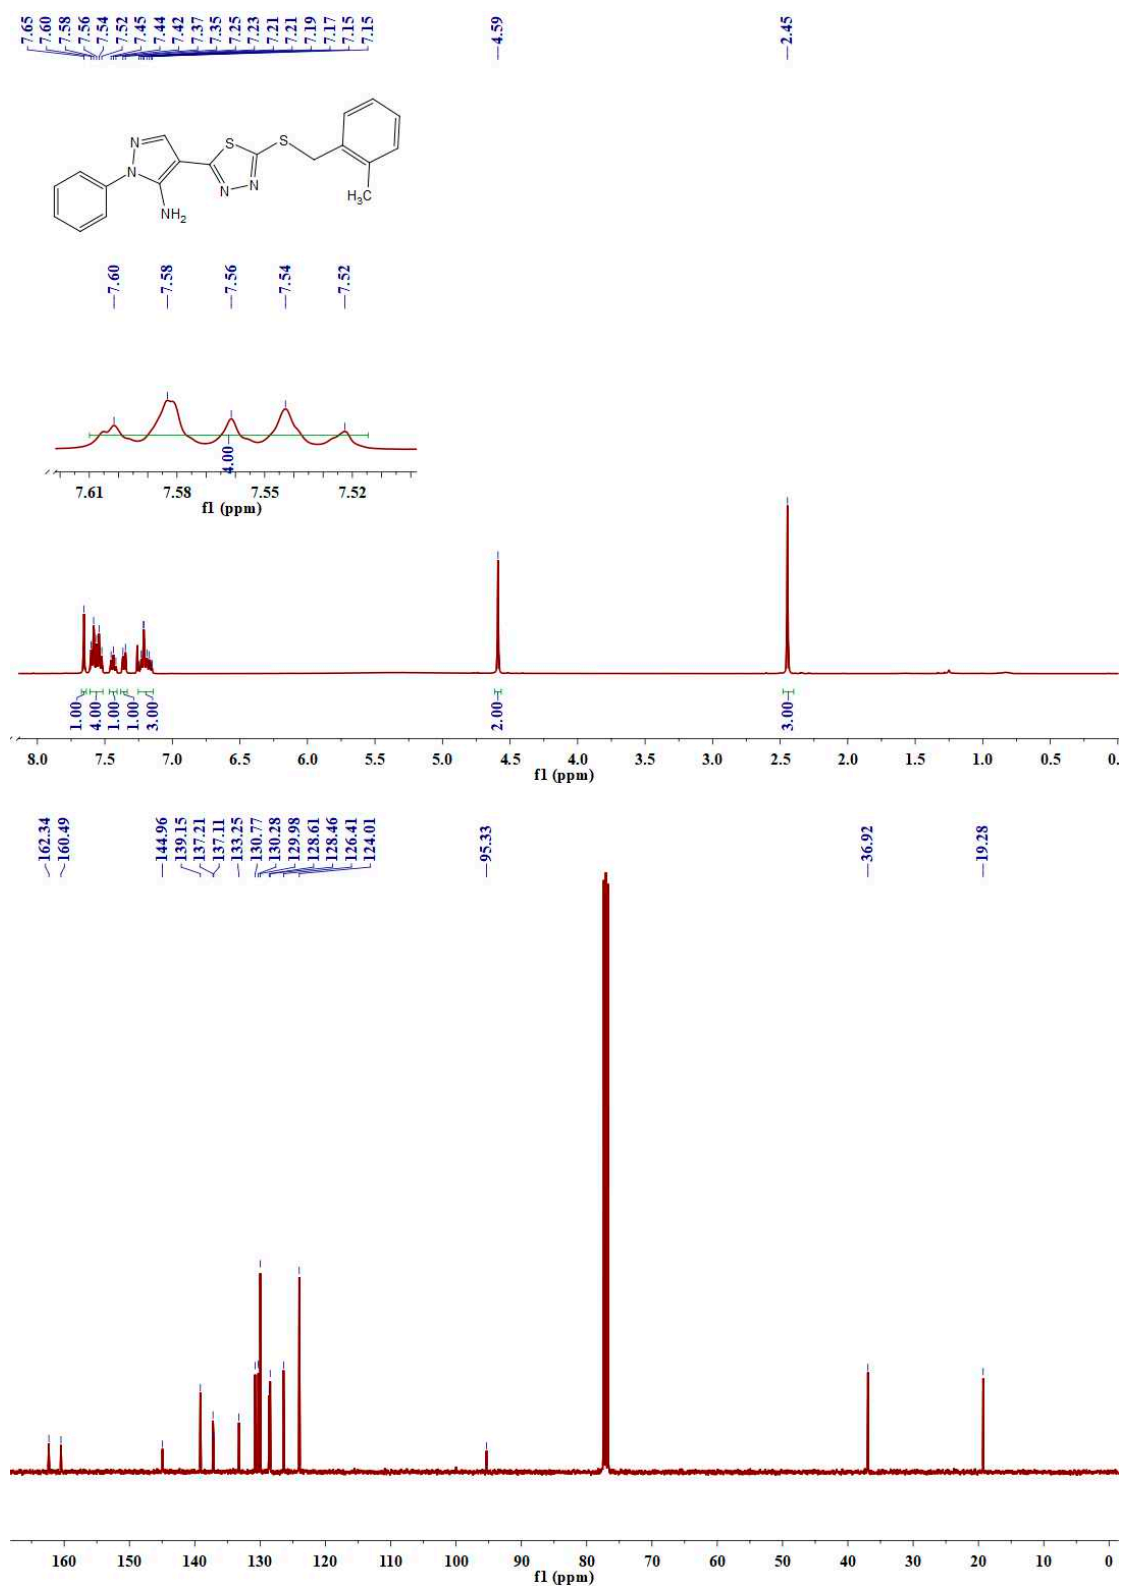

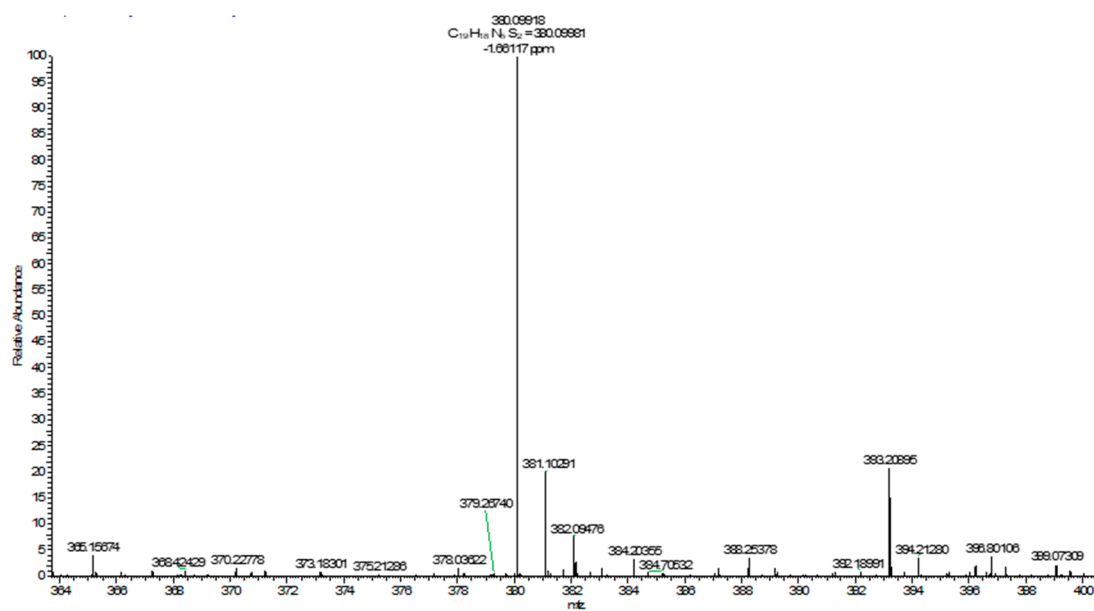

Figure S10. <sup>1</sup>H NMR, <sup>13</sup>C NMR and HRMS for title compound E<sub>5</sub>.

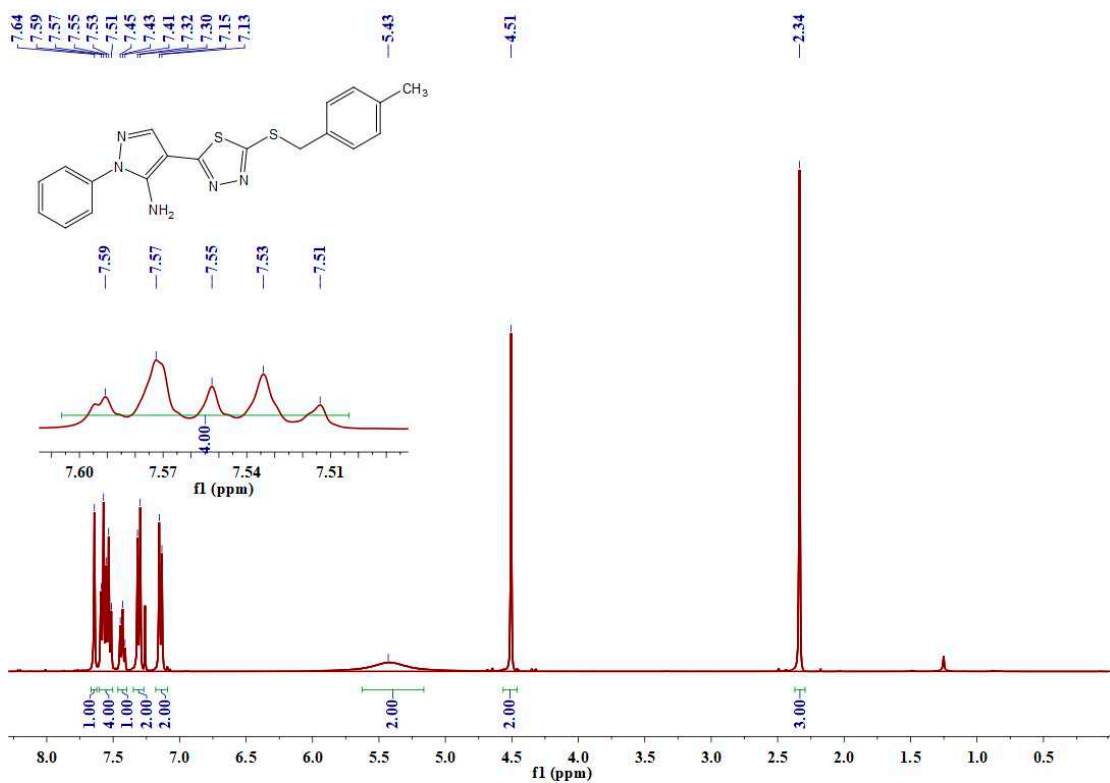

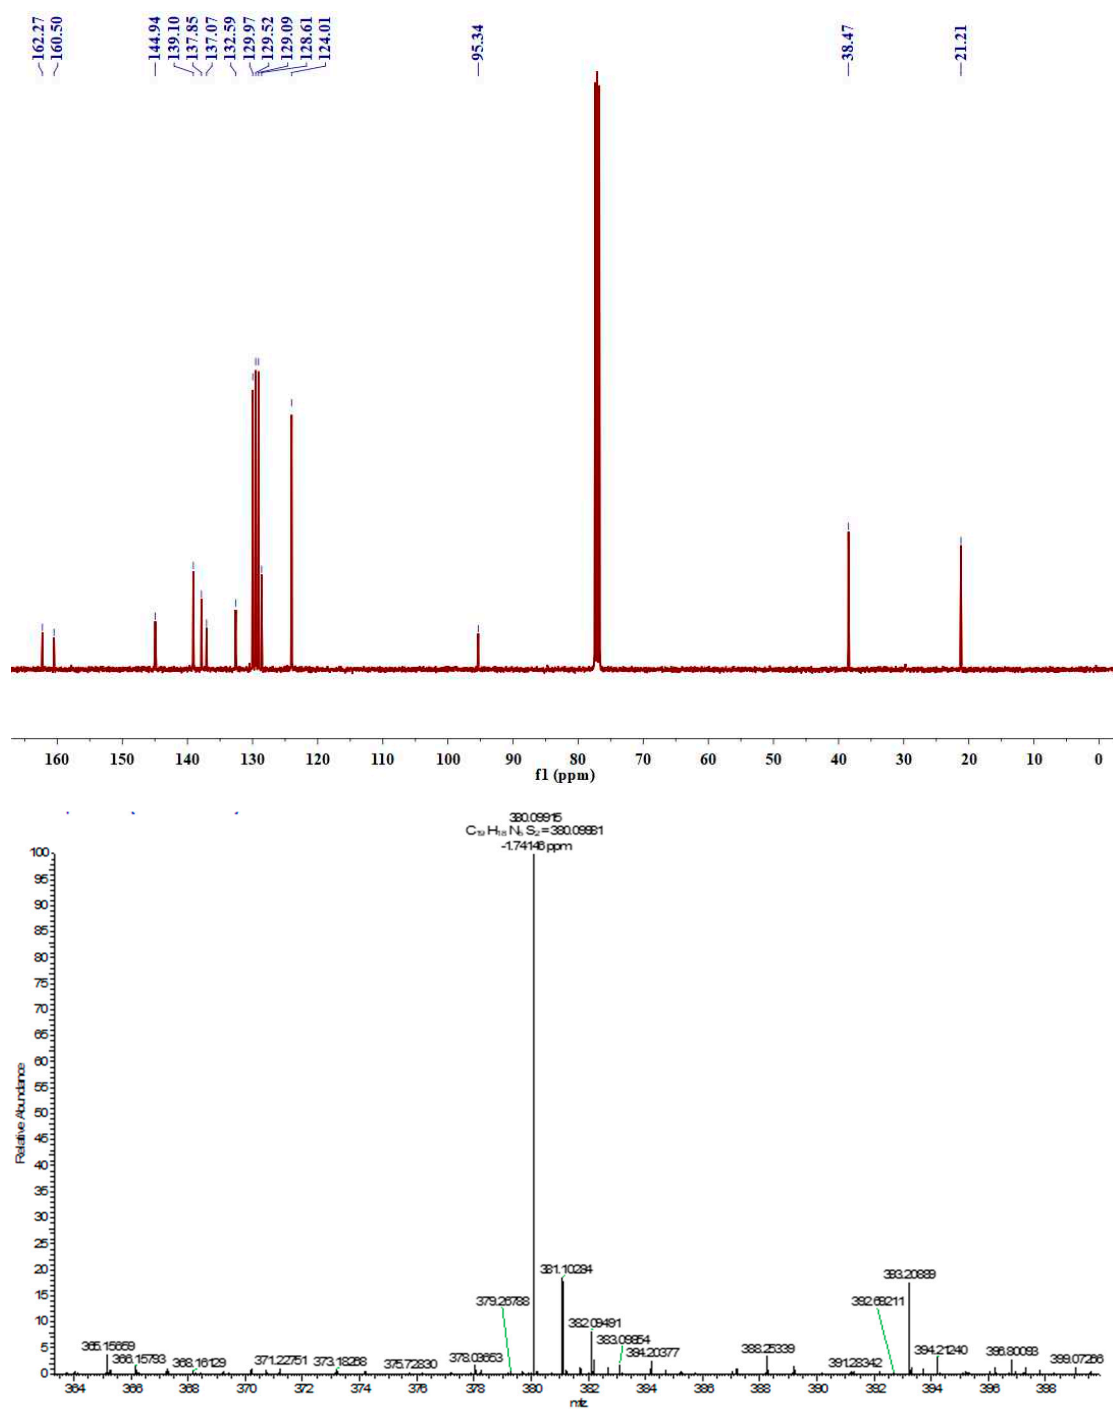

Figure S11. <sup>1</sup>H NMR, <sup>13</sup>C NMR and HRMS for title compound E6.

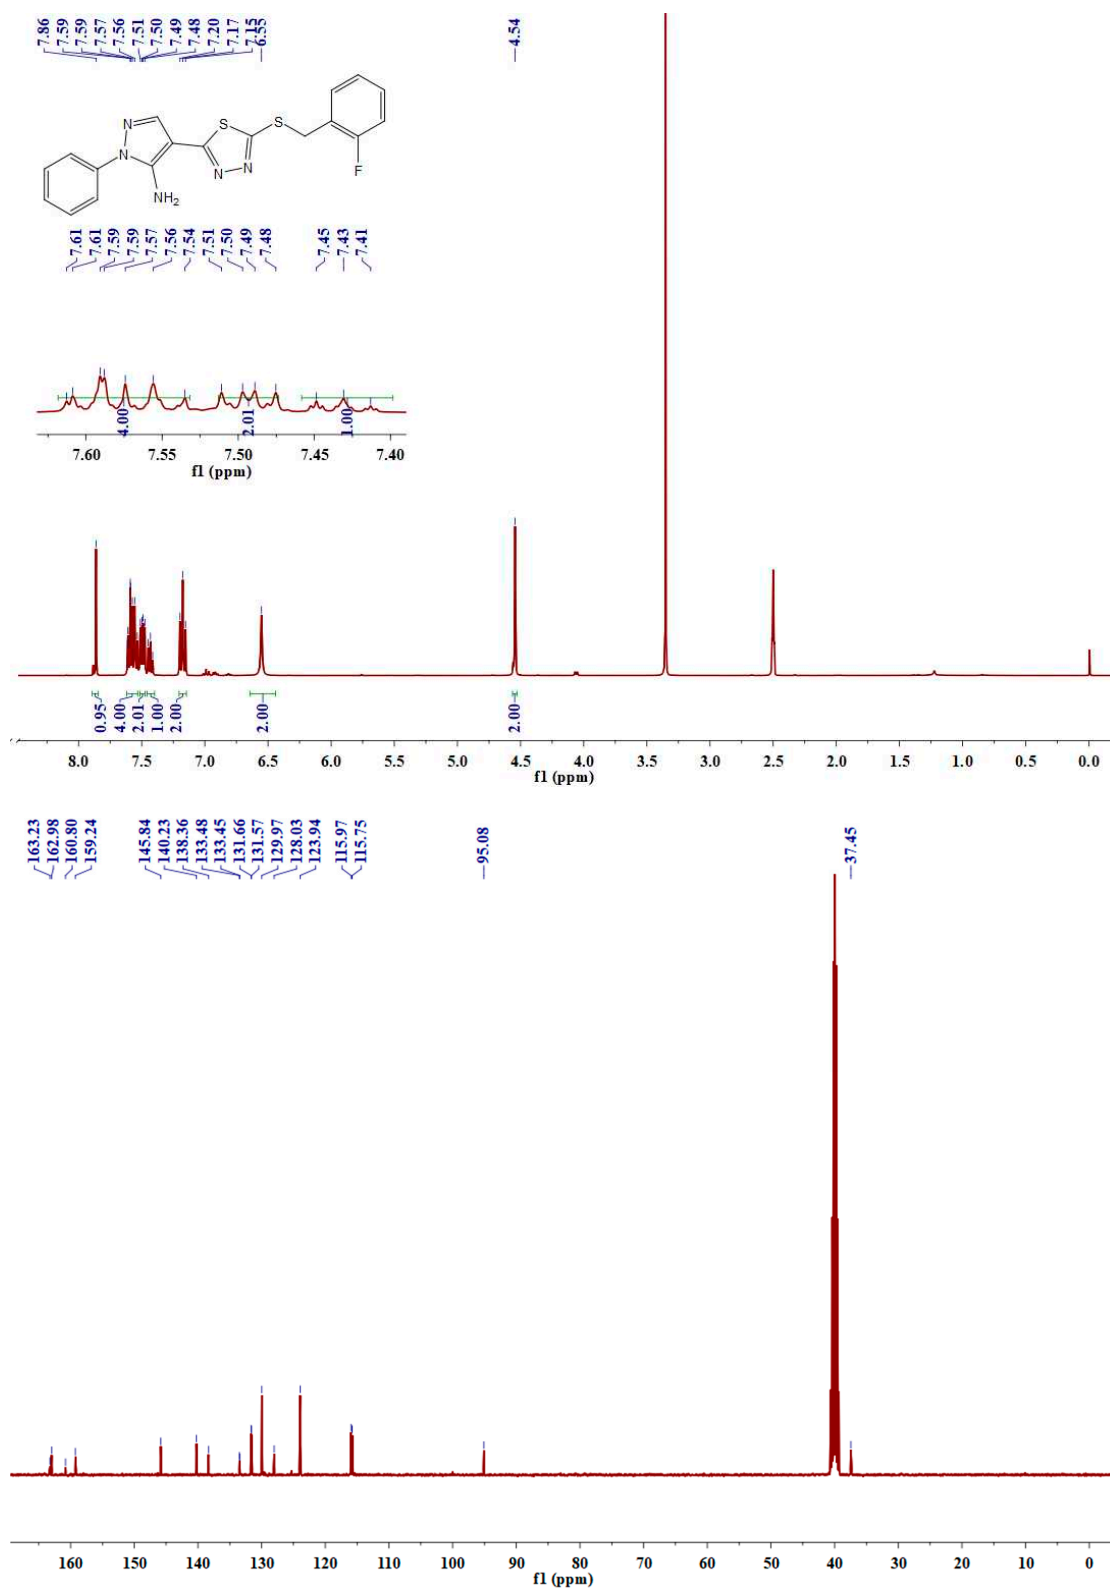

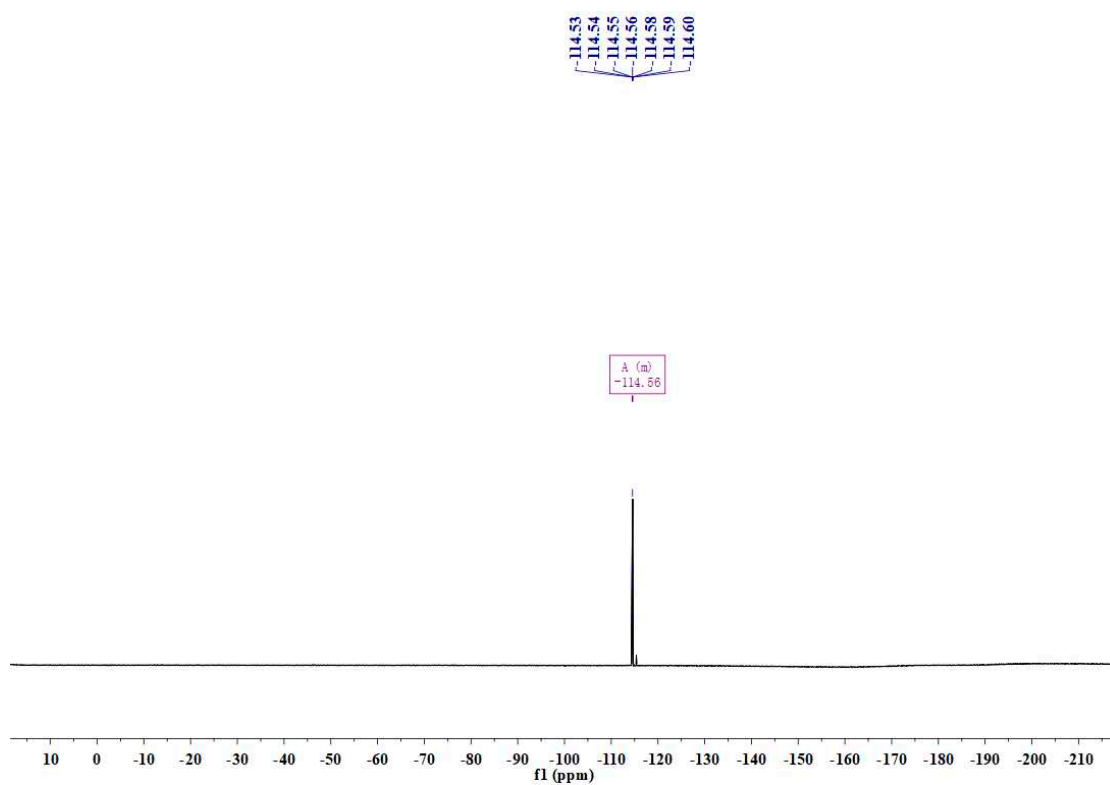



Item name: Z-1001  
Item description:

Channel name: 1: Average Time 0.1046 min : TOF MS (50-1500) ESI+ : Centroided : Combined

1.1e7

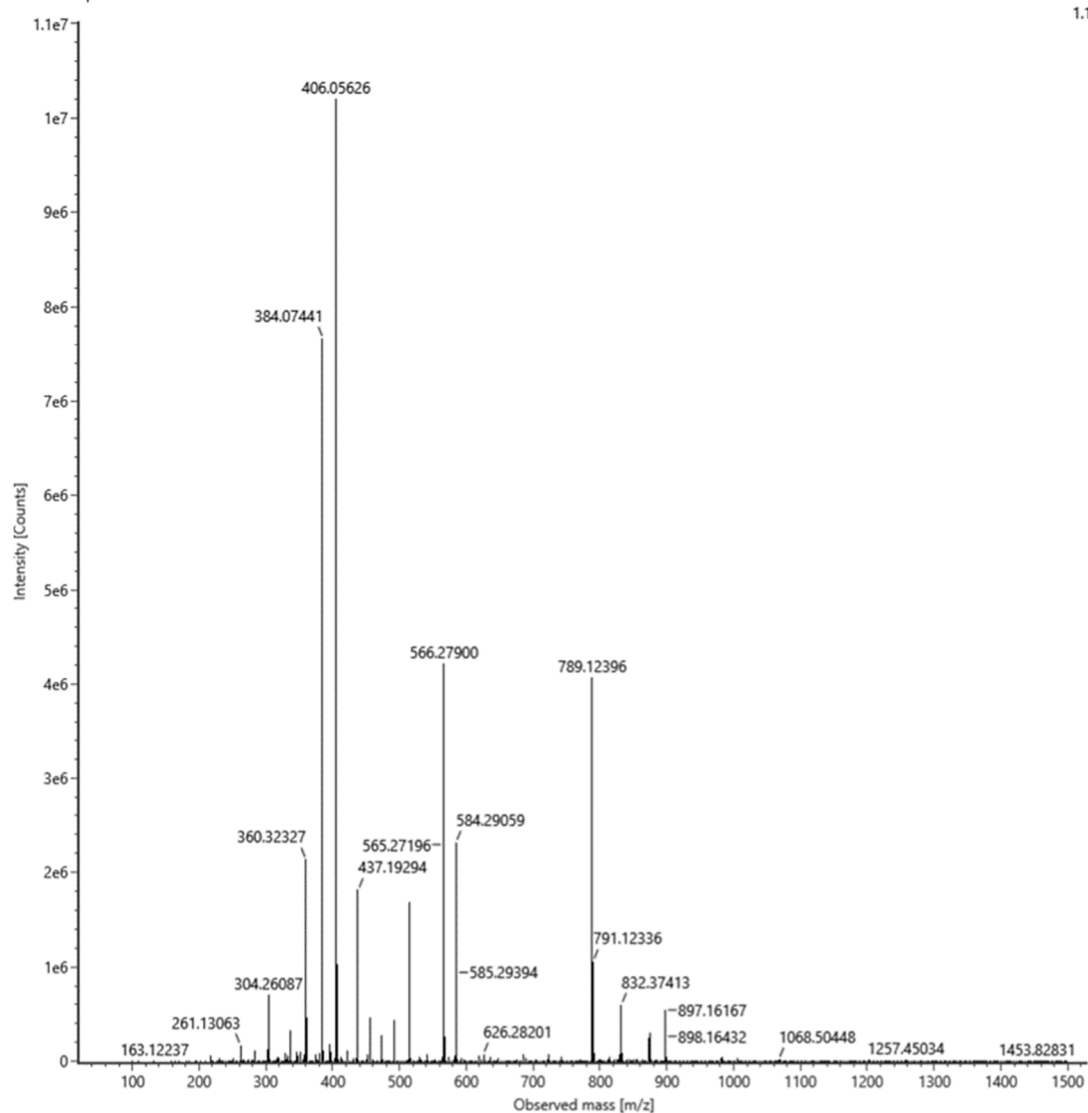

**Figure S12.**  $^1\text{H}$  NMR,  $^{13}\text{C}$  NMR,  $^{19}\text{F}$  NMR and HRMS for title compound E<sub>7</sub>.

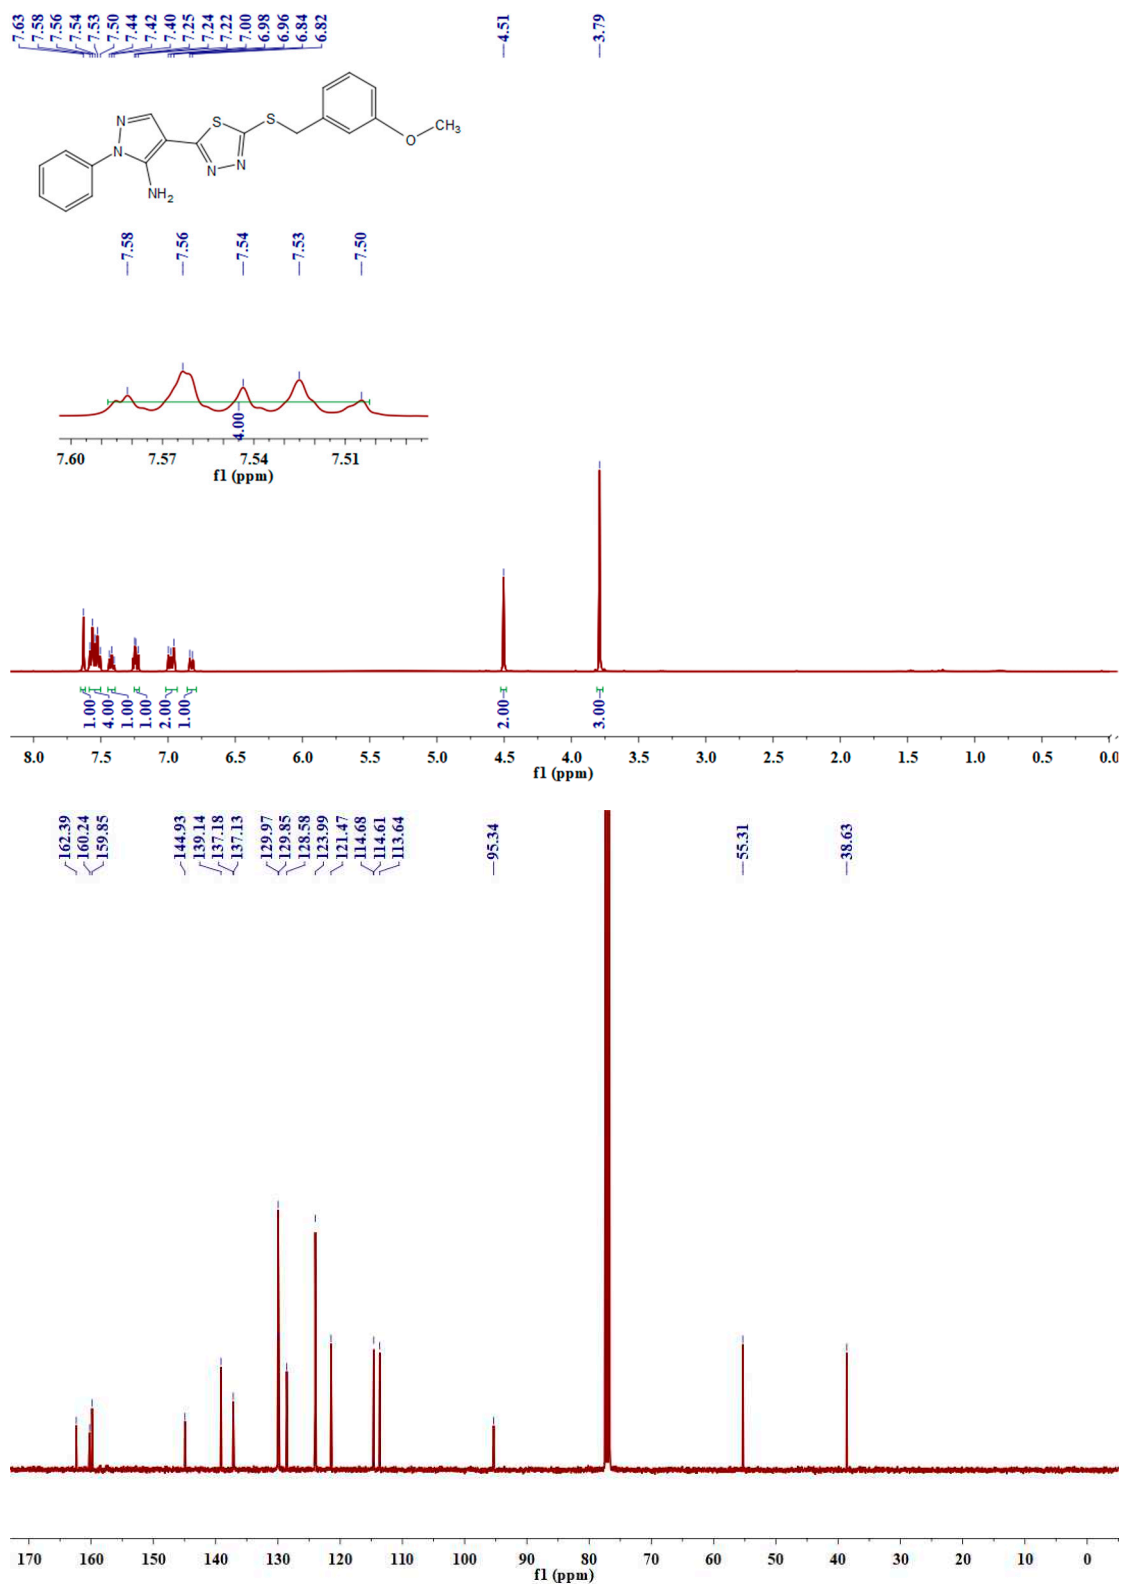

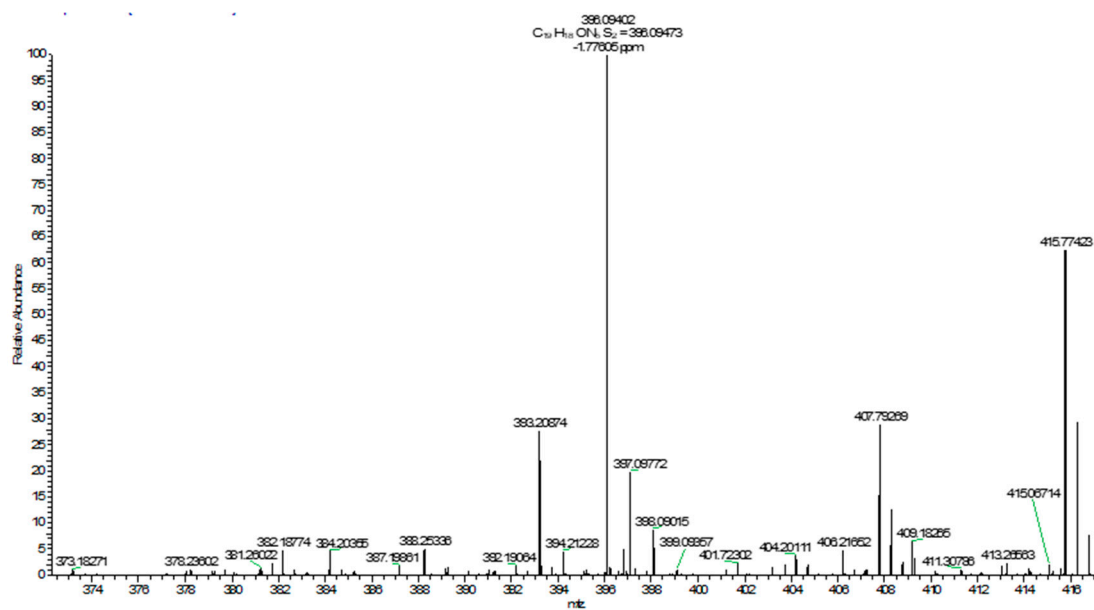

Figure S13. <sup>1</sup>H NMR, <sup>13</sup>C NMR and HRMS for title compound E8.

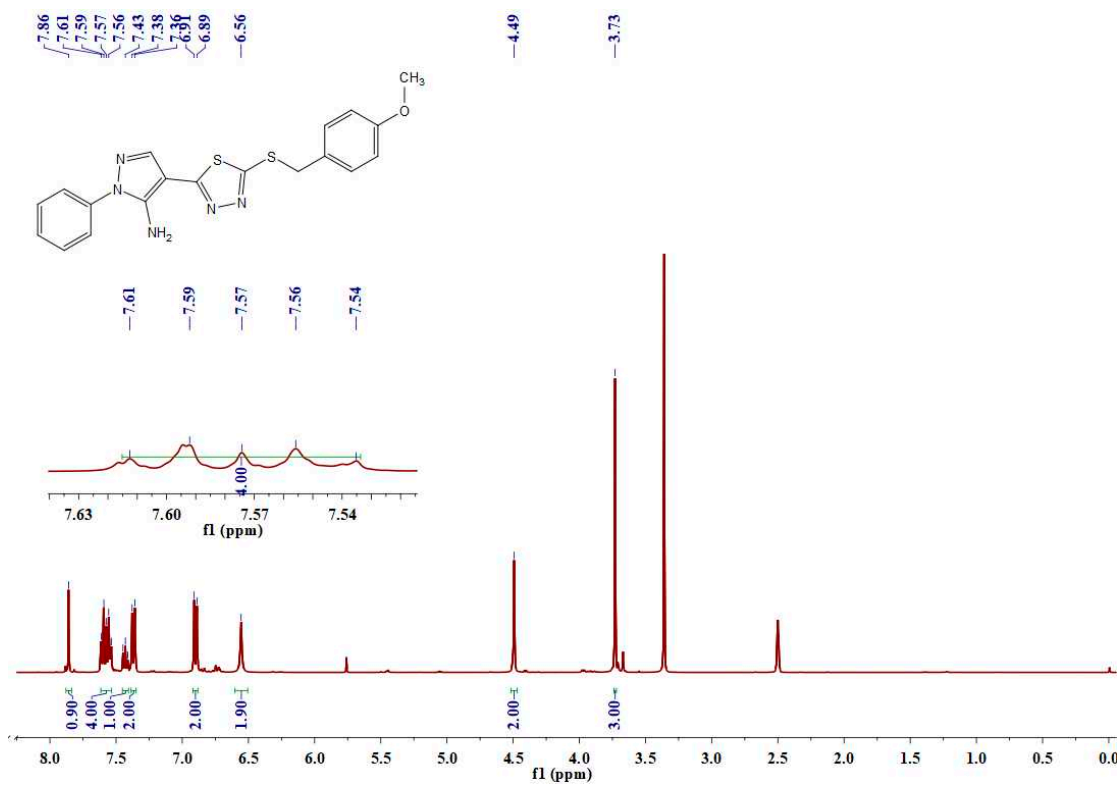

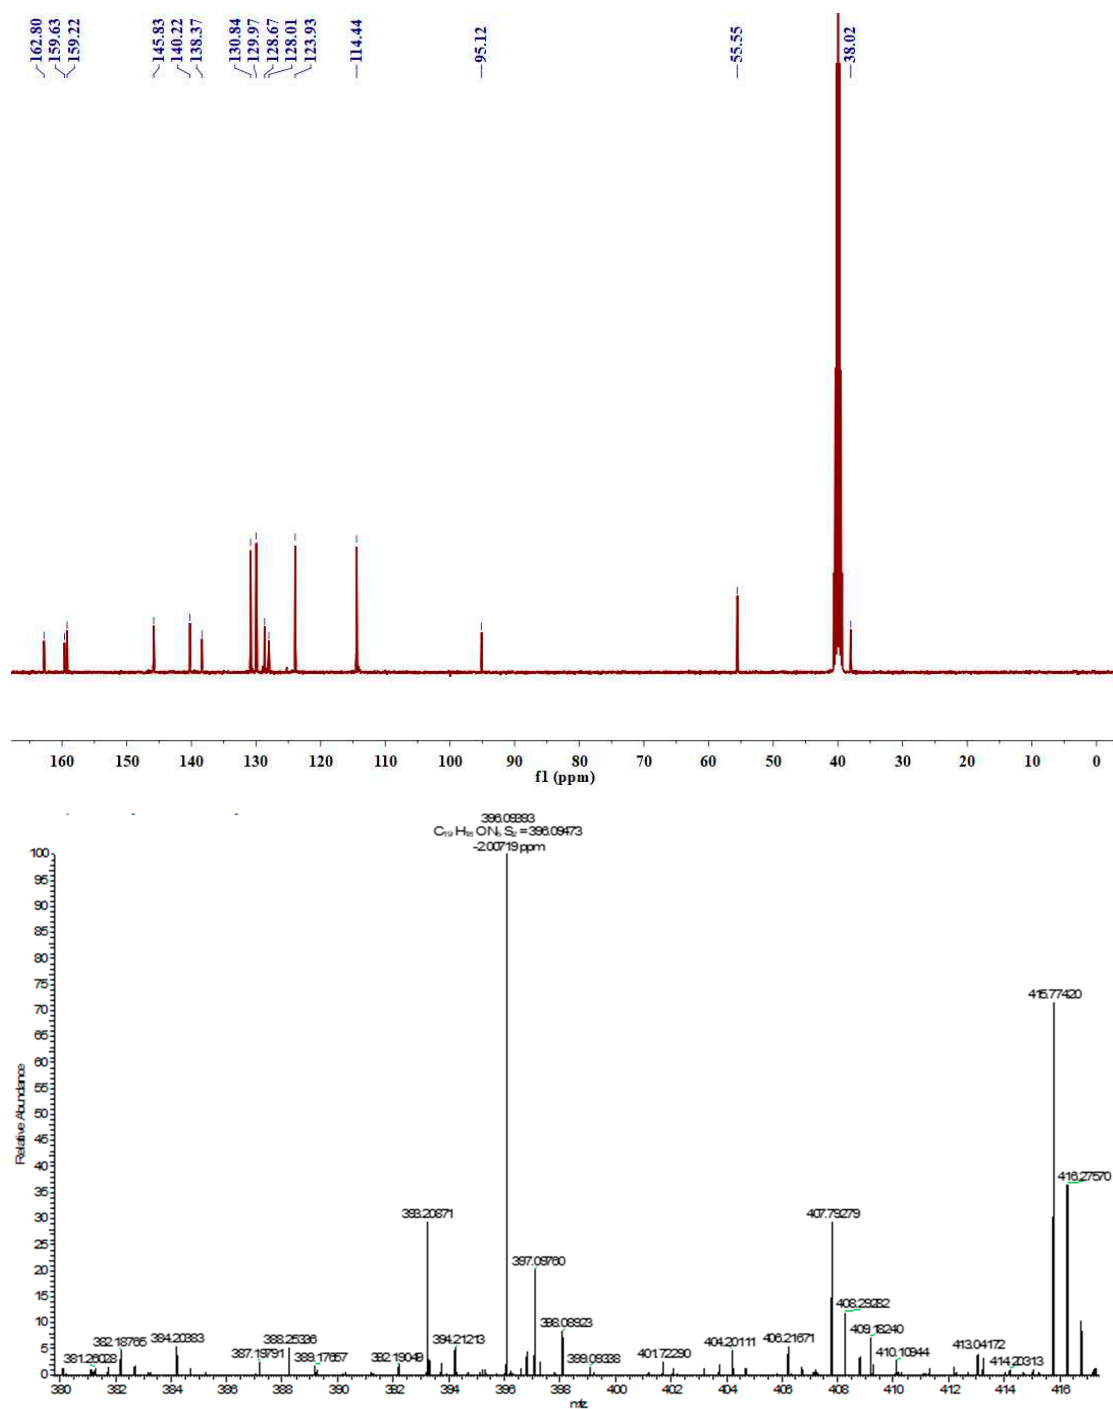

**Figure S14.** <sup>1</sup>H NMR, <sup>13</sup>C NMR and HRMS for title compound E9.

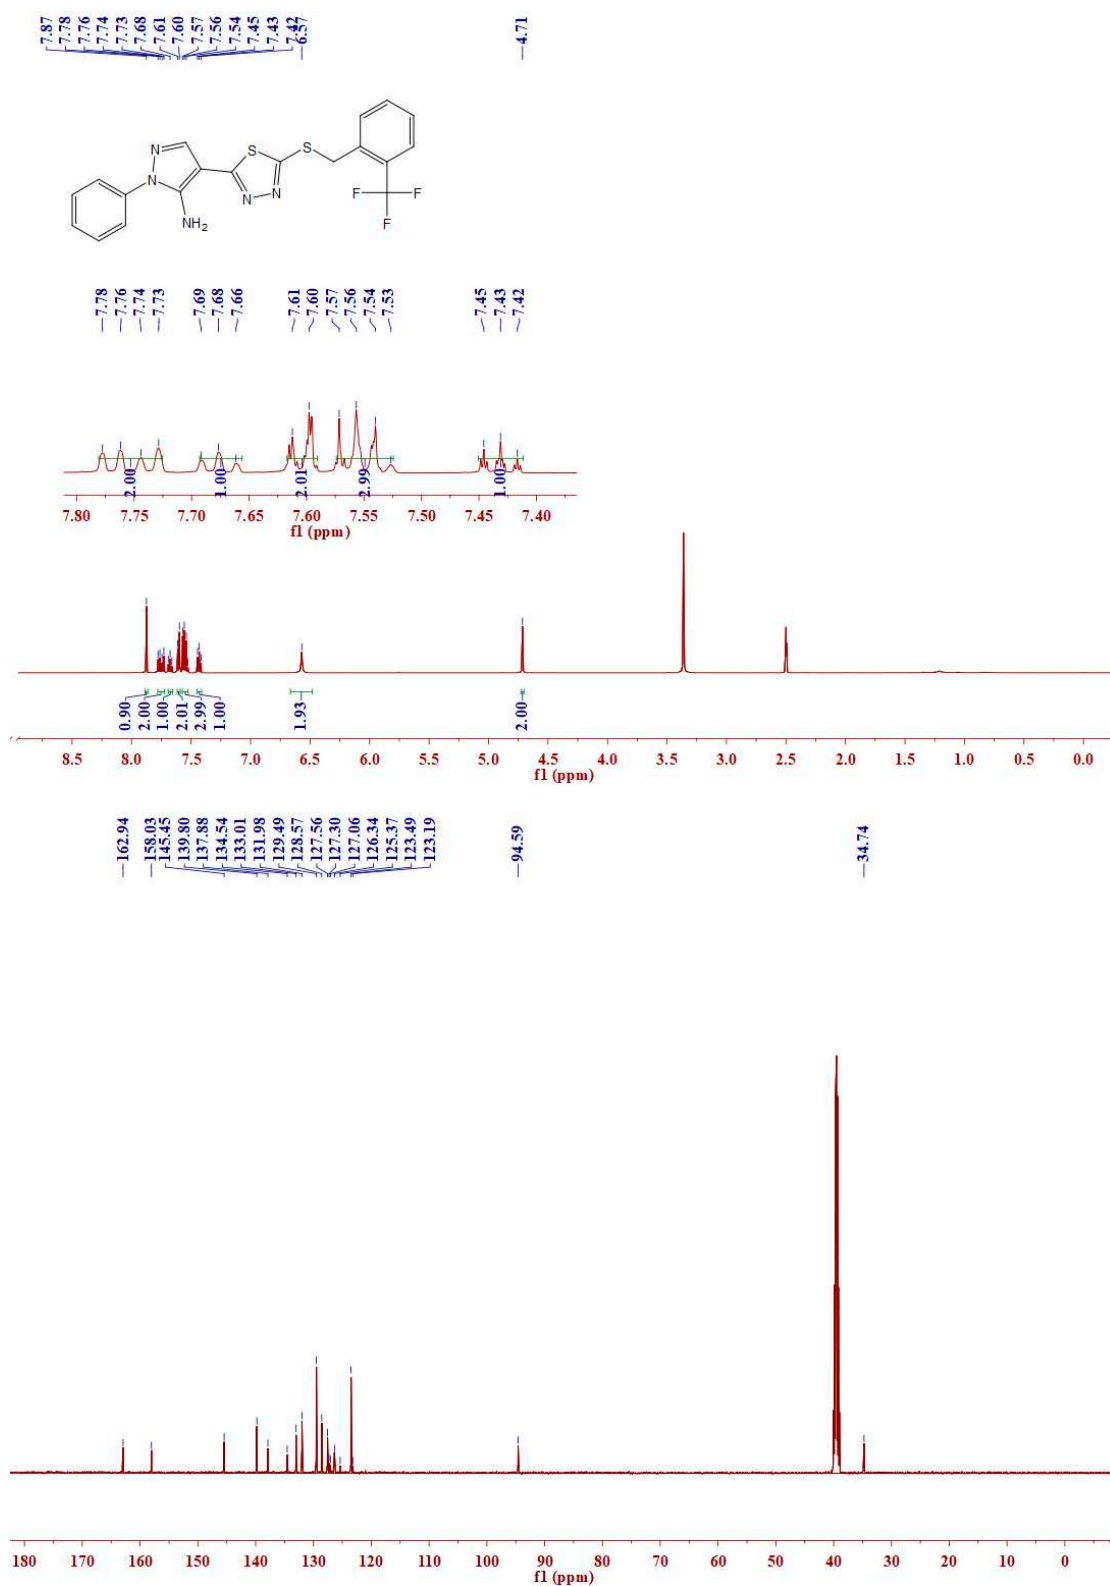

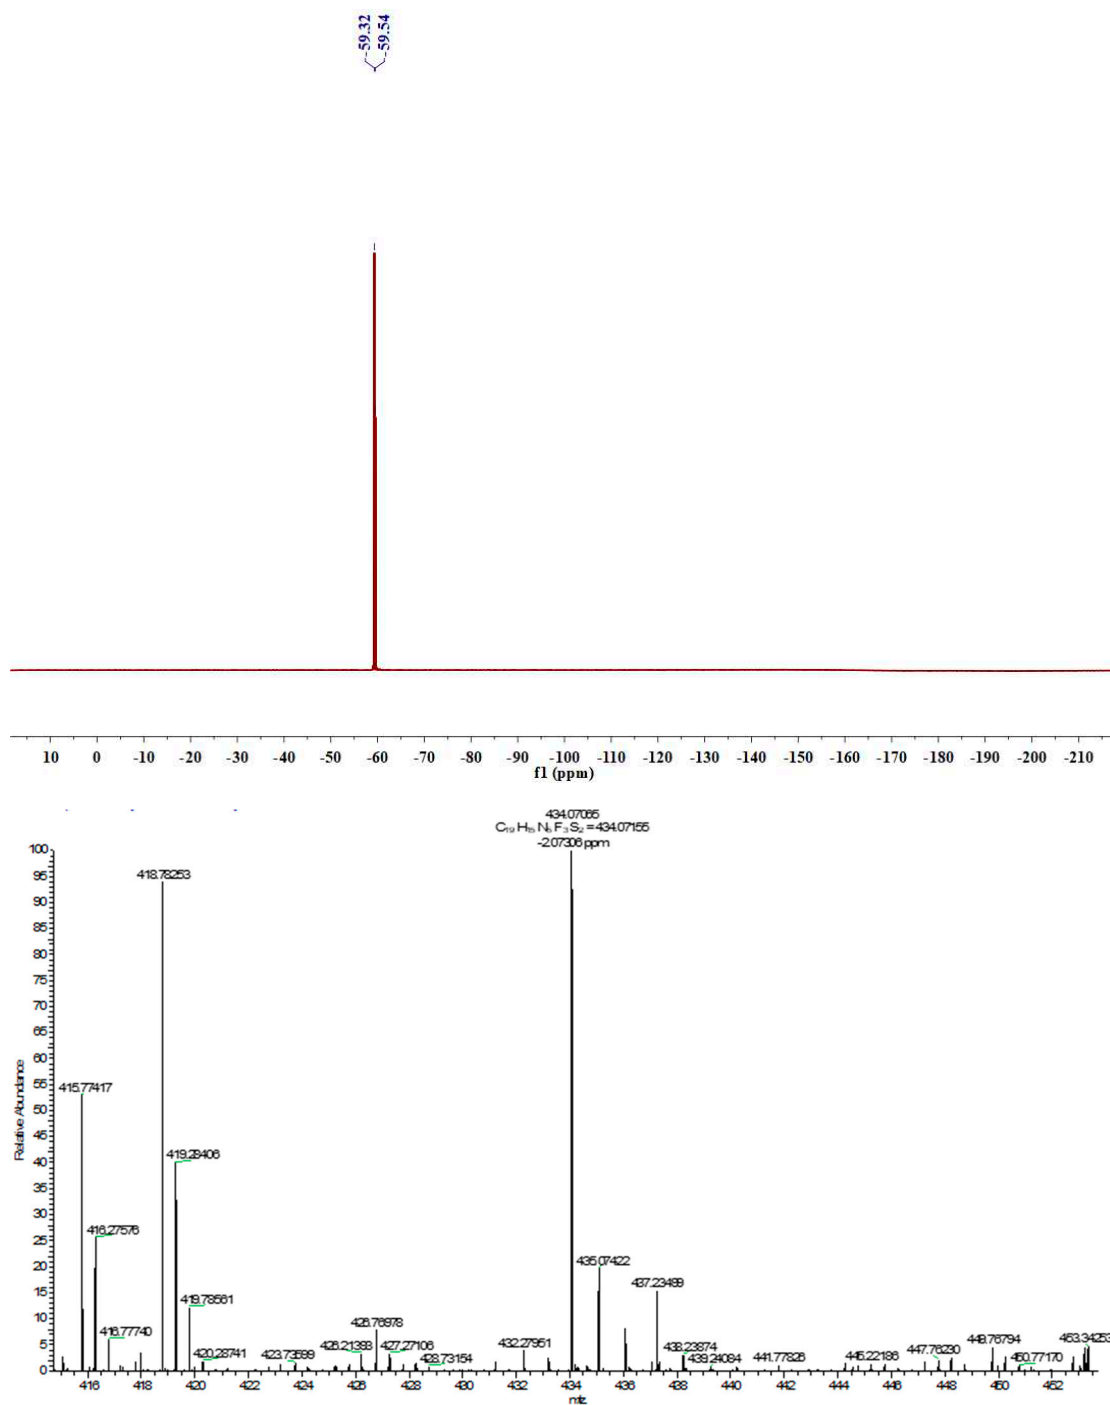

**Figure S15.**  $^1\text{H}$  NMR,  $^{13}\text{C}$  NMR,  $^{19}\text{F}$  NMR and HRMS for title compound **E10**.

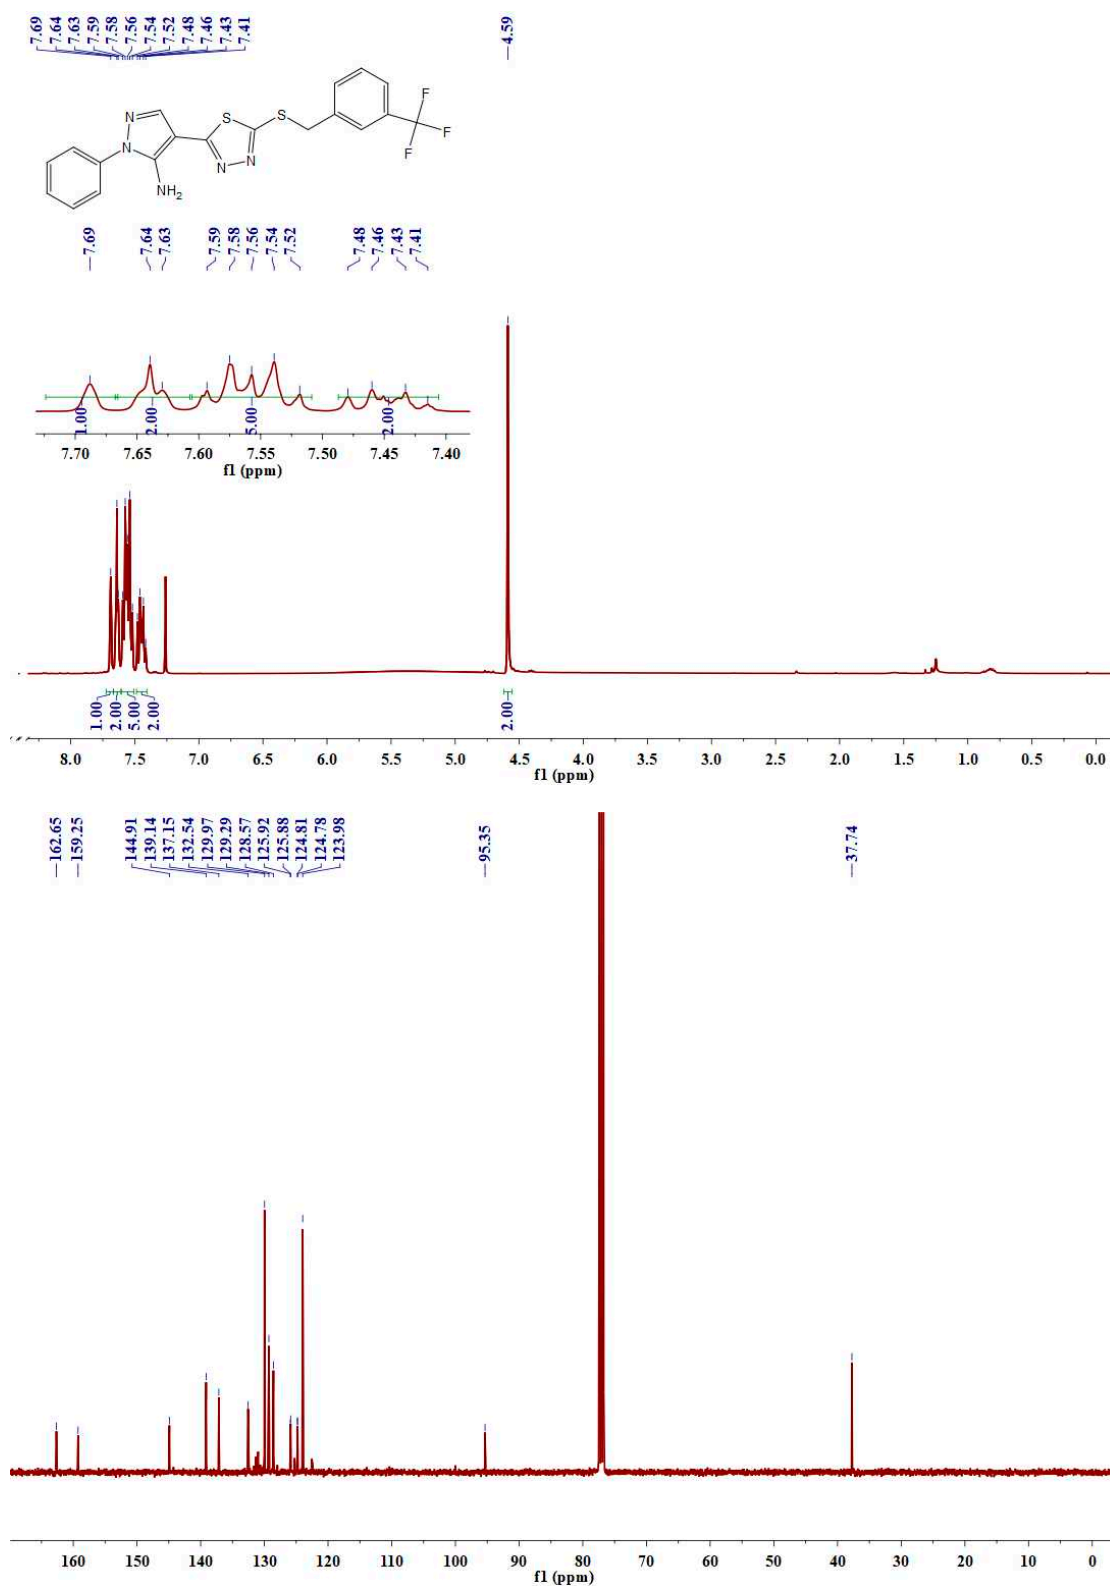

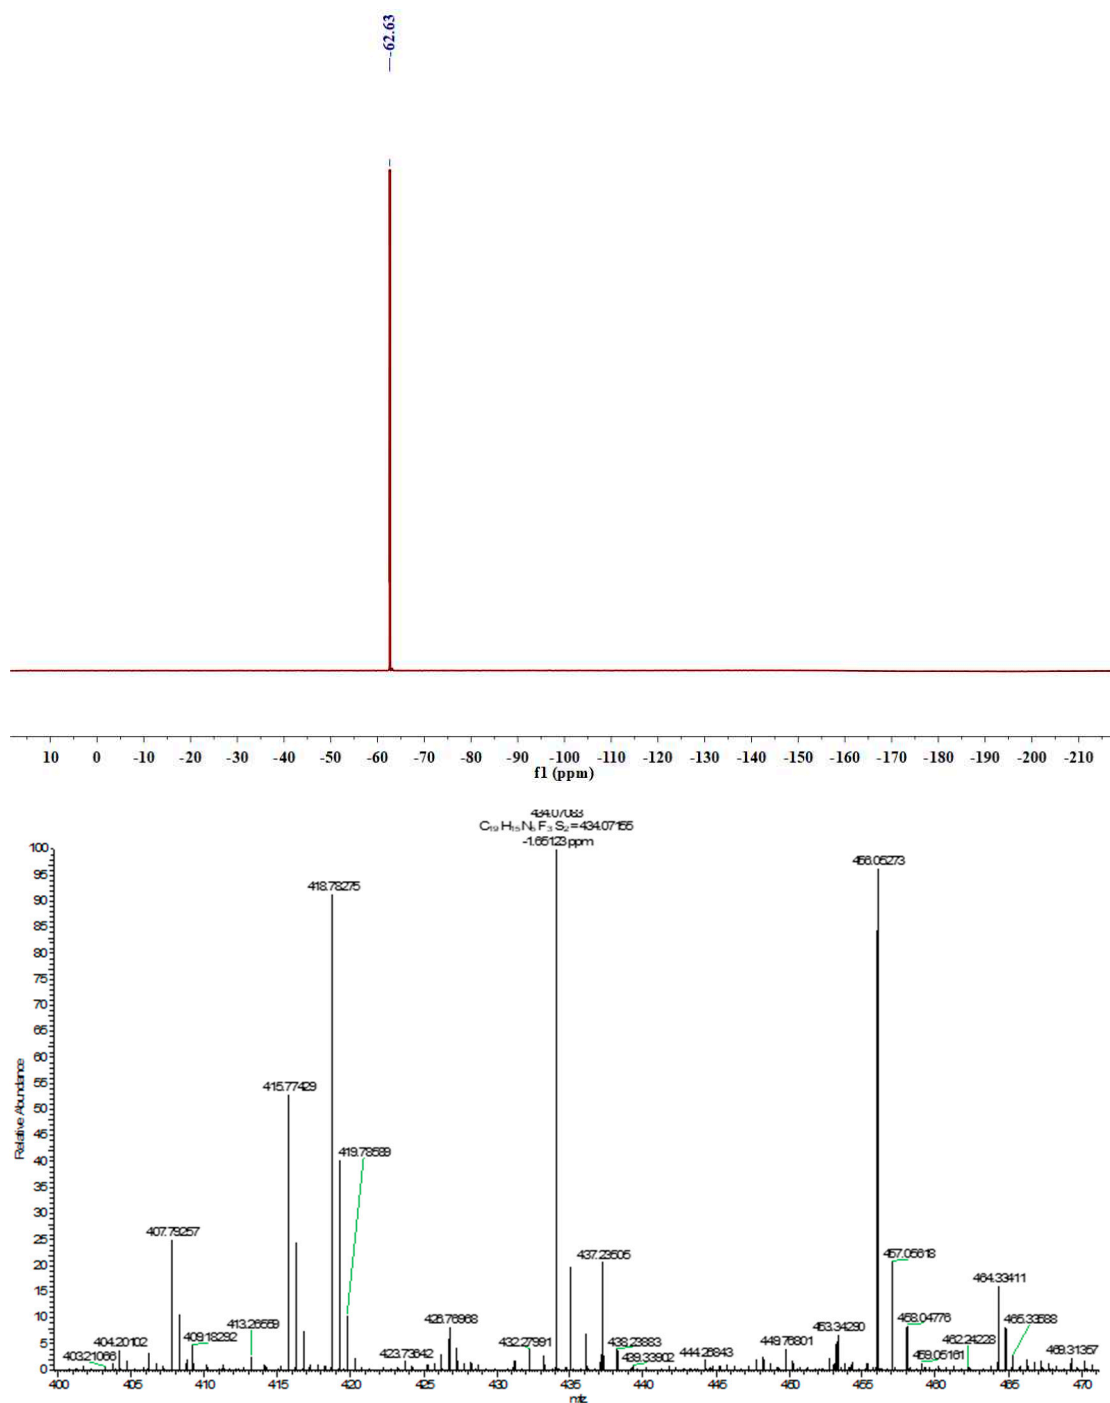

Figure S16.  $^1\text{H}$  NMR,  $^{13}\text{C}$  NMR,  $^{19}\text{F}$  NMR and HRMS for title compound **E11**.



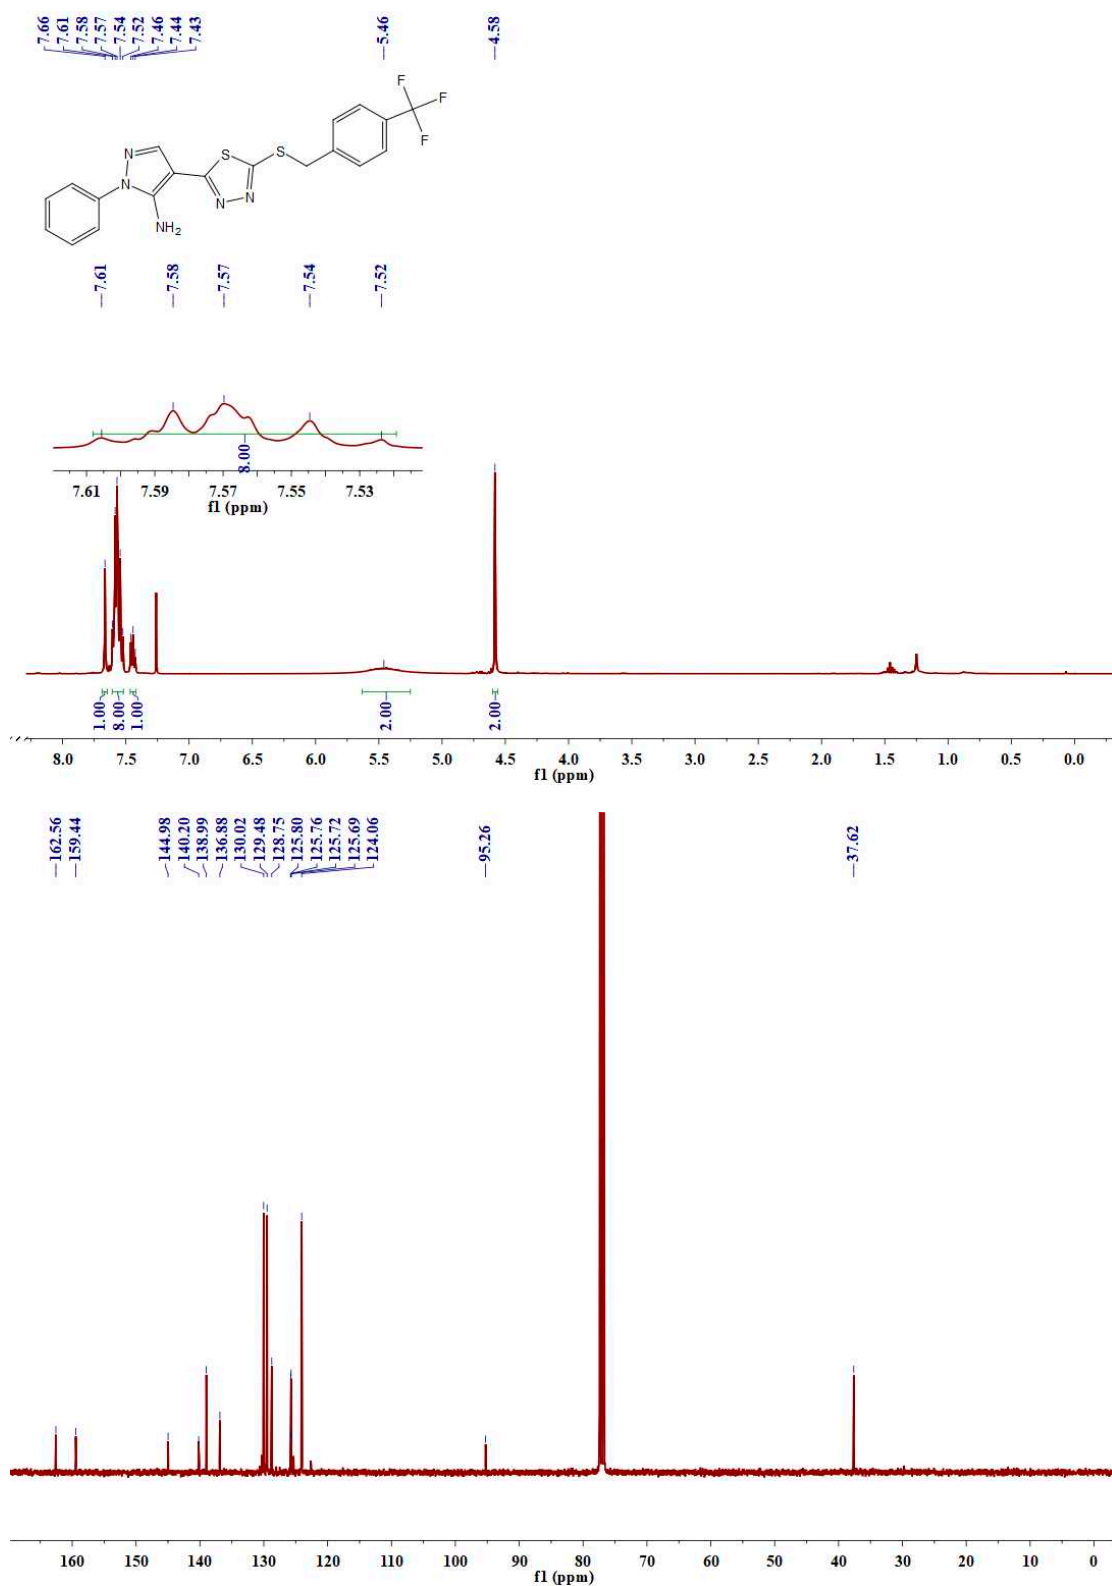

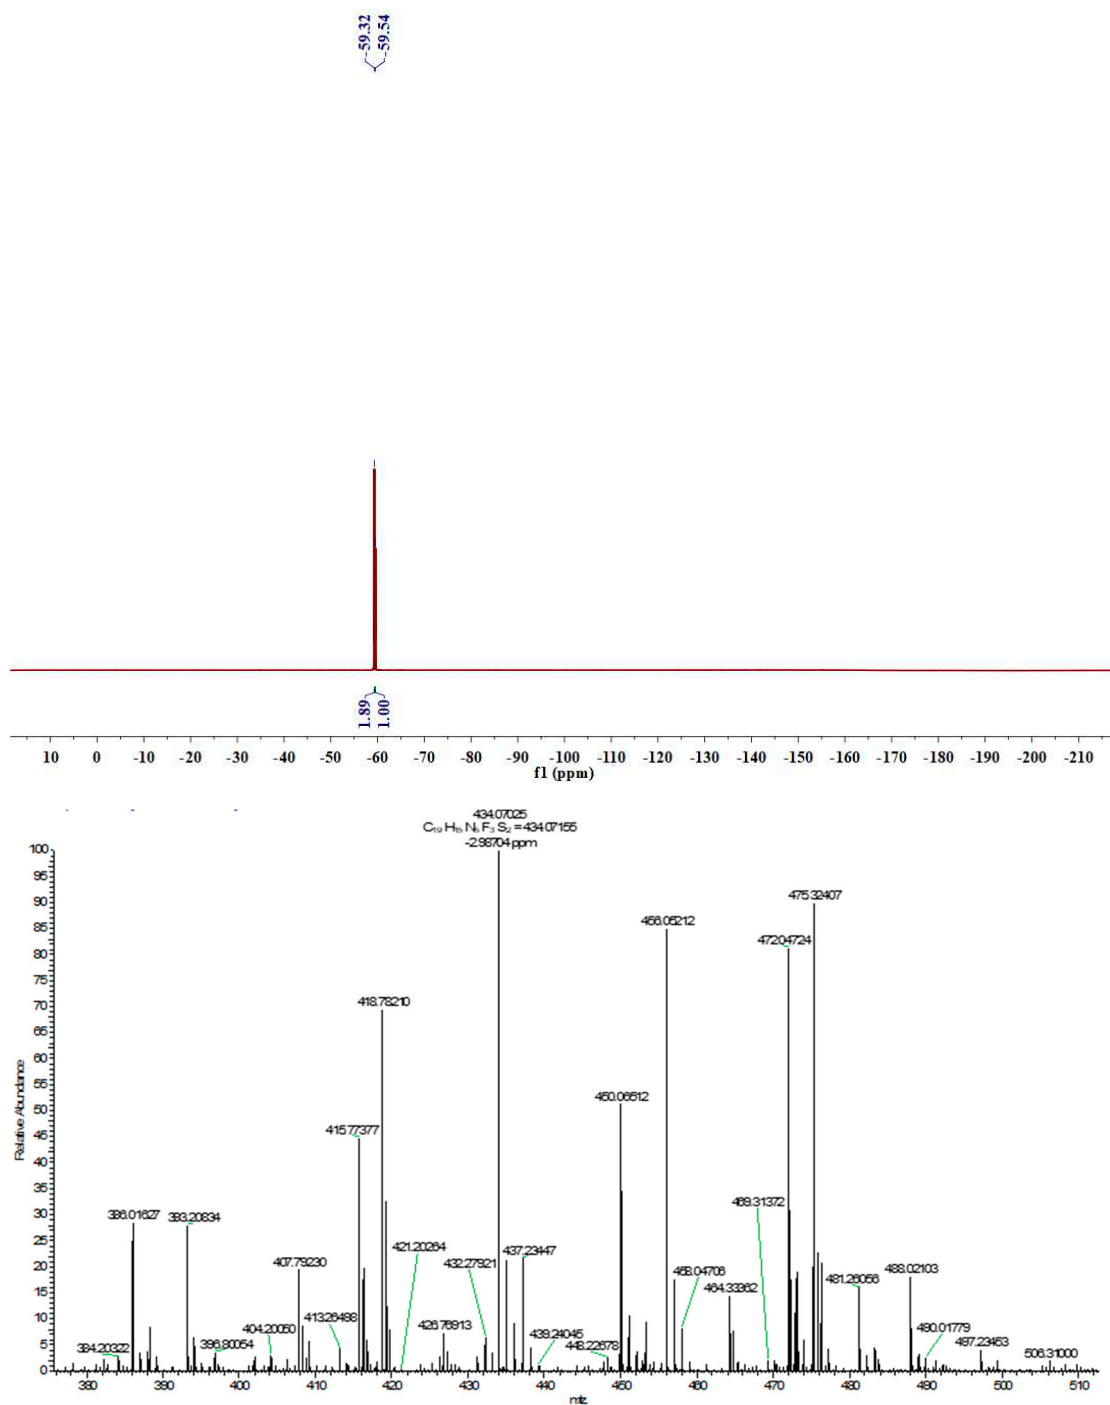

Figure S17.  $^1\text{H}$  NMR,  $^{13}\text{C}$  NMR,  $^{19}\text{F}$  NMR and HRMS for title compound **E12**.

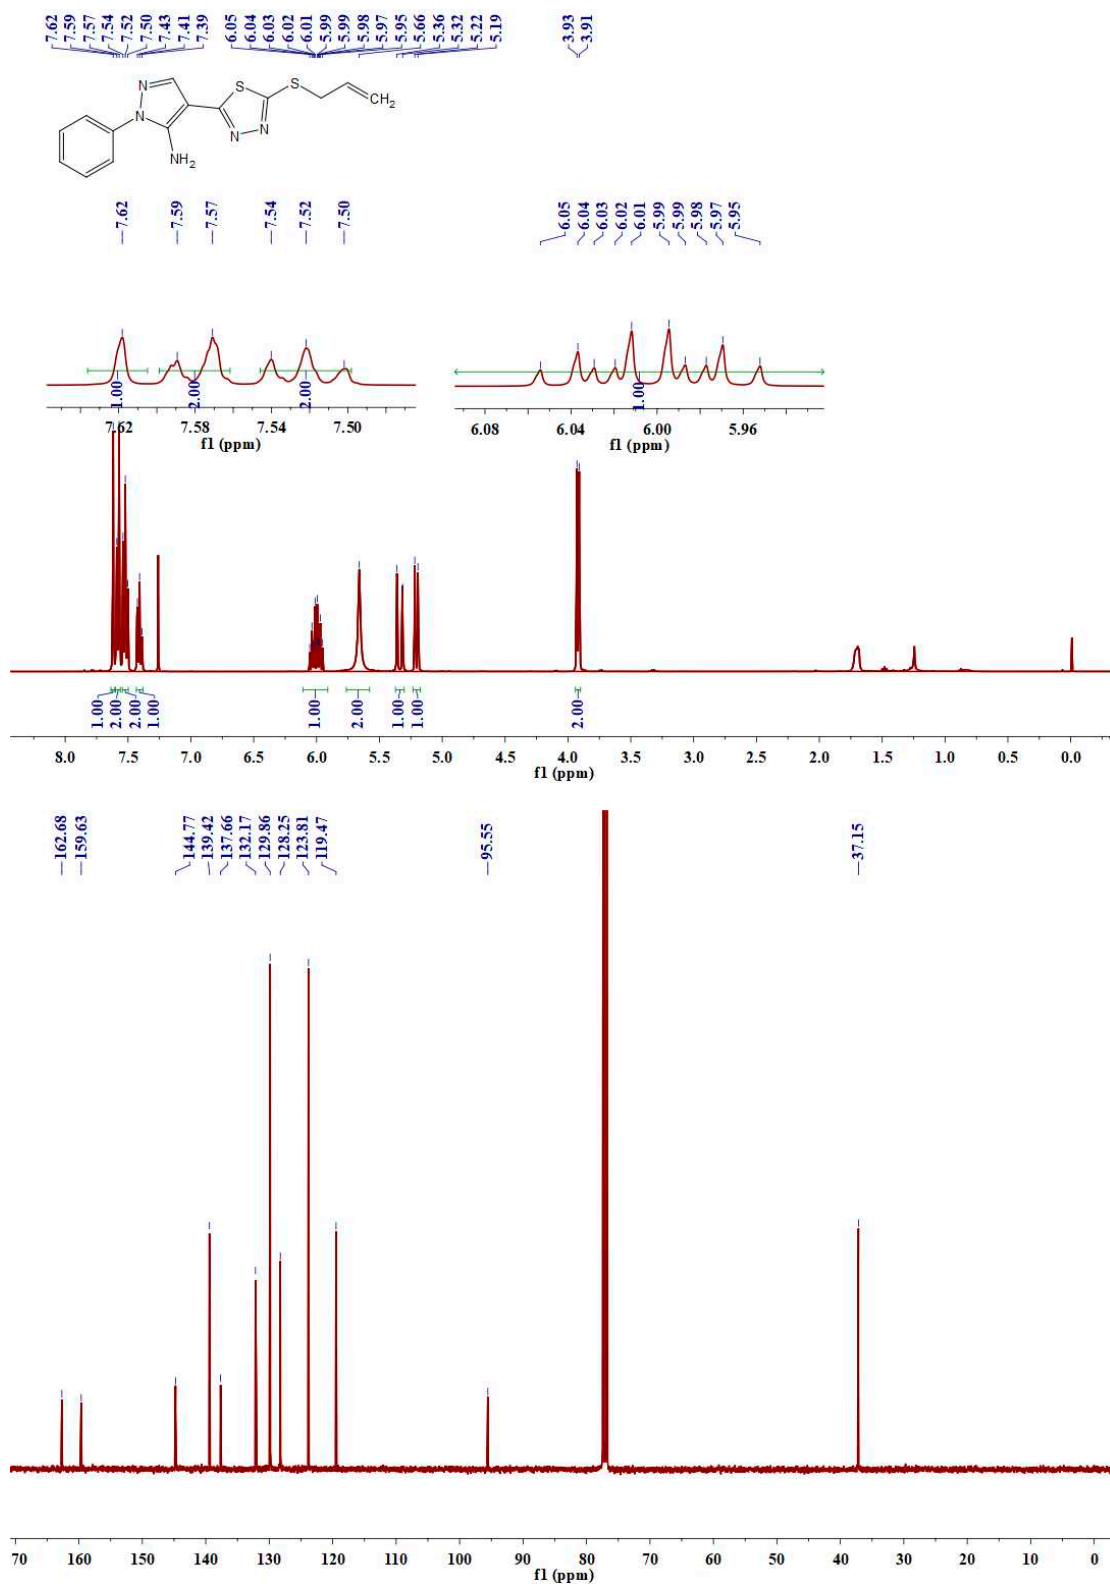

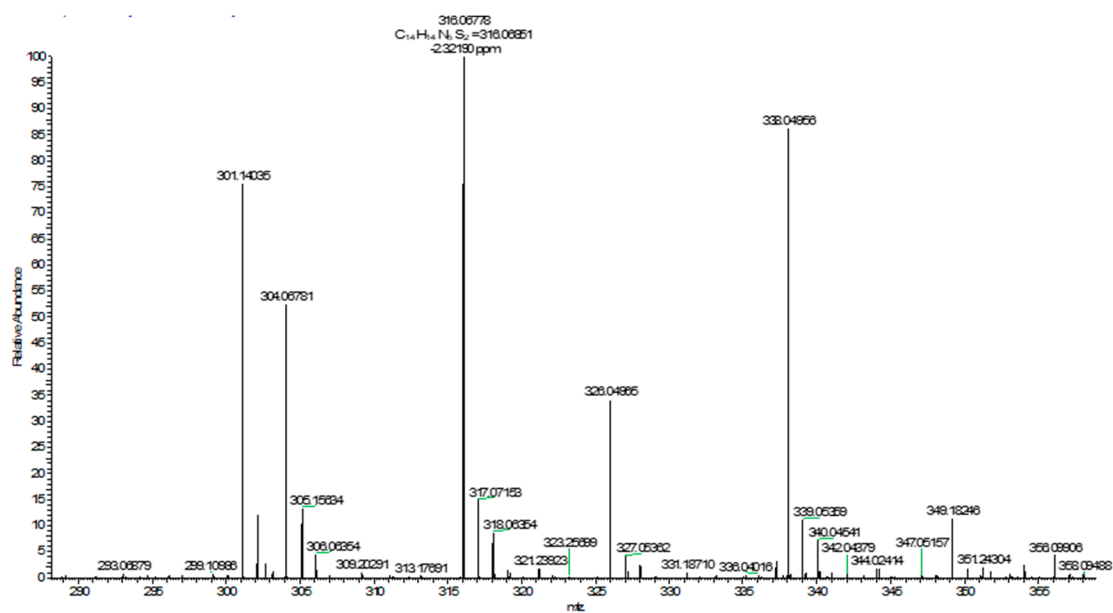

**Figure S18.** <sup>1</sup>H NMR, <sup>13</sup>C NMR, <sup>19</sup>F NMR and HRMS for title compound E13.

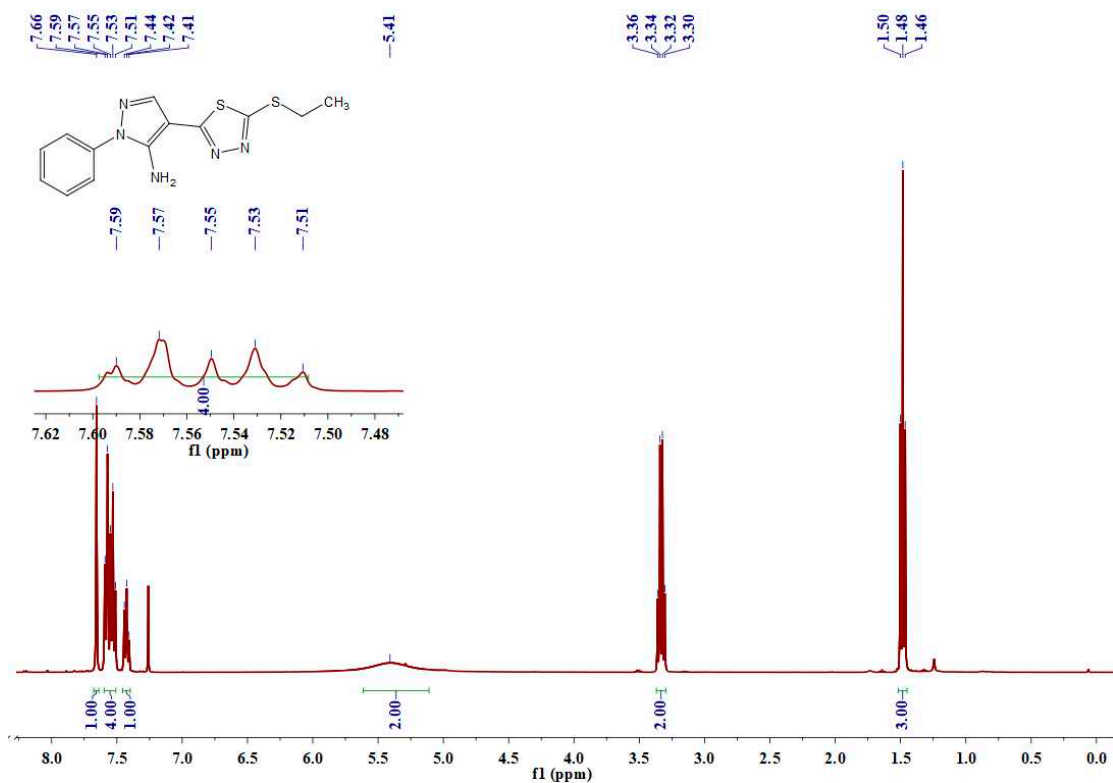

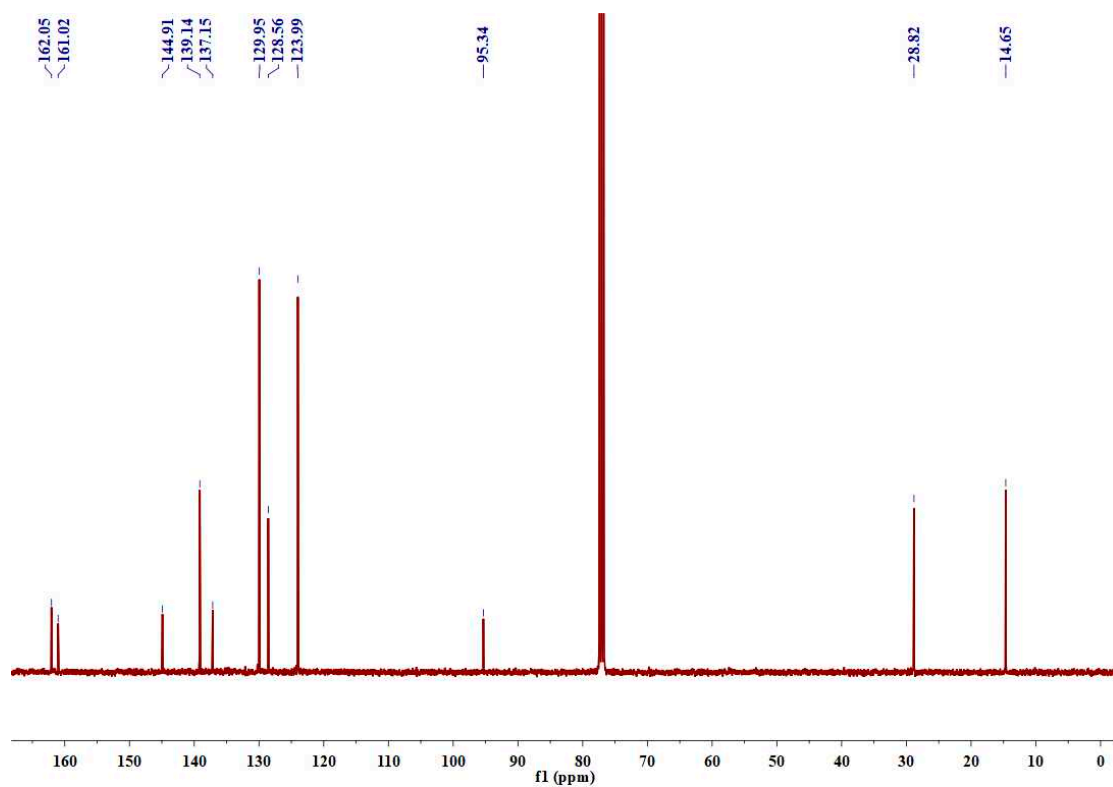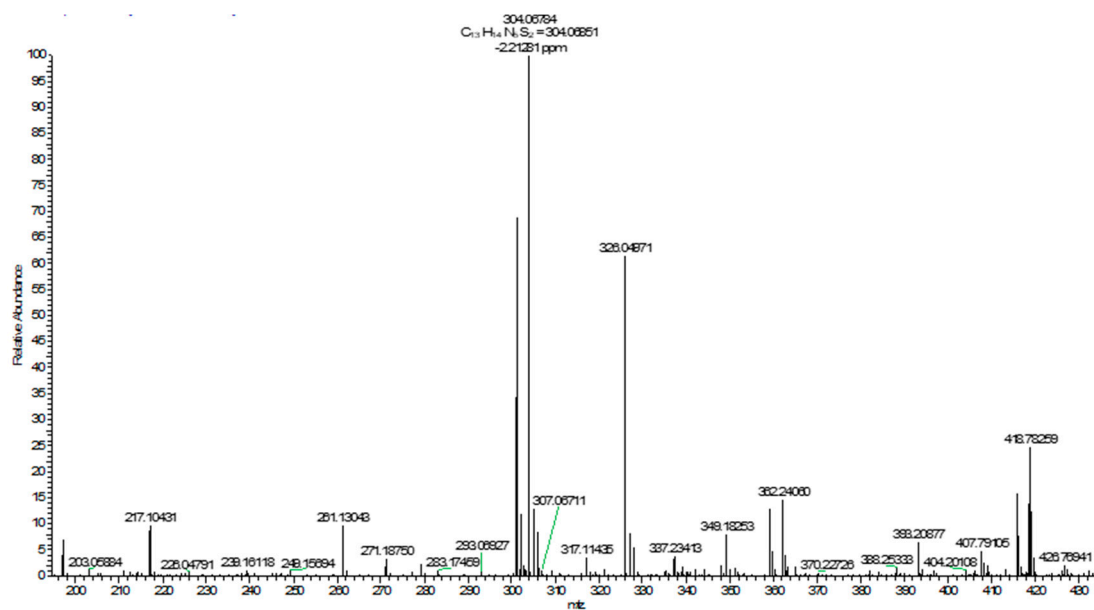

**Figure S19.** <sup>1</sup>H NMR, <sup>13</sup>C NMR, <sup>19</sup>F NMR and HRMS for title compound **E14**.

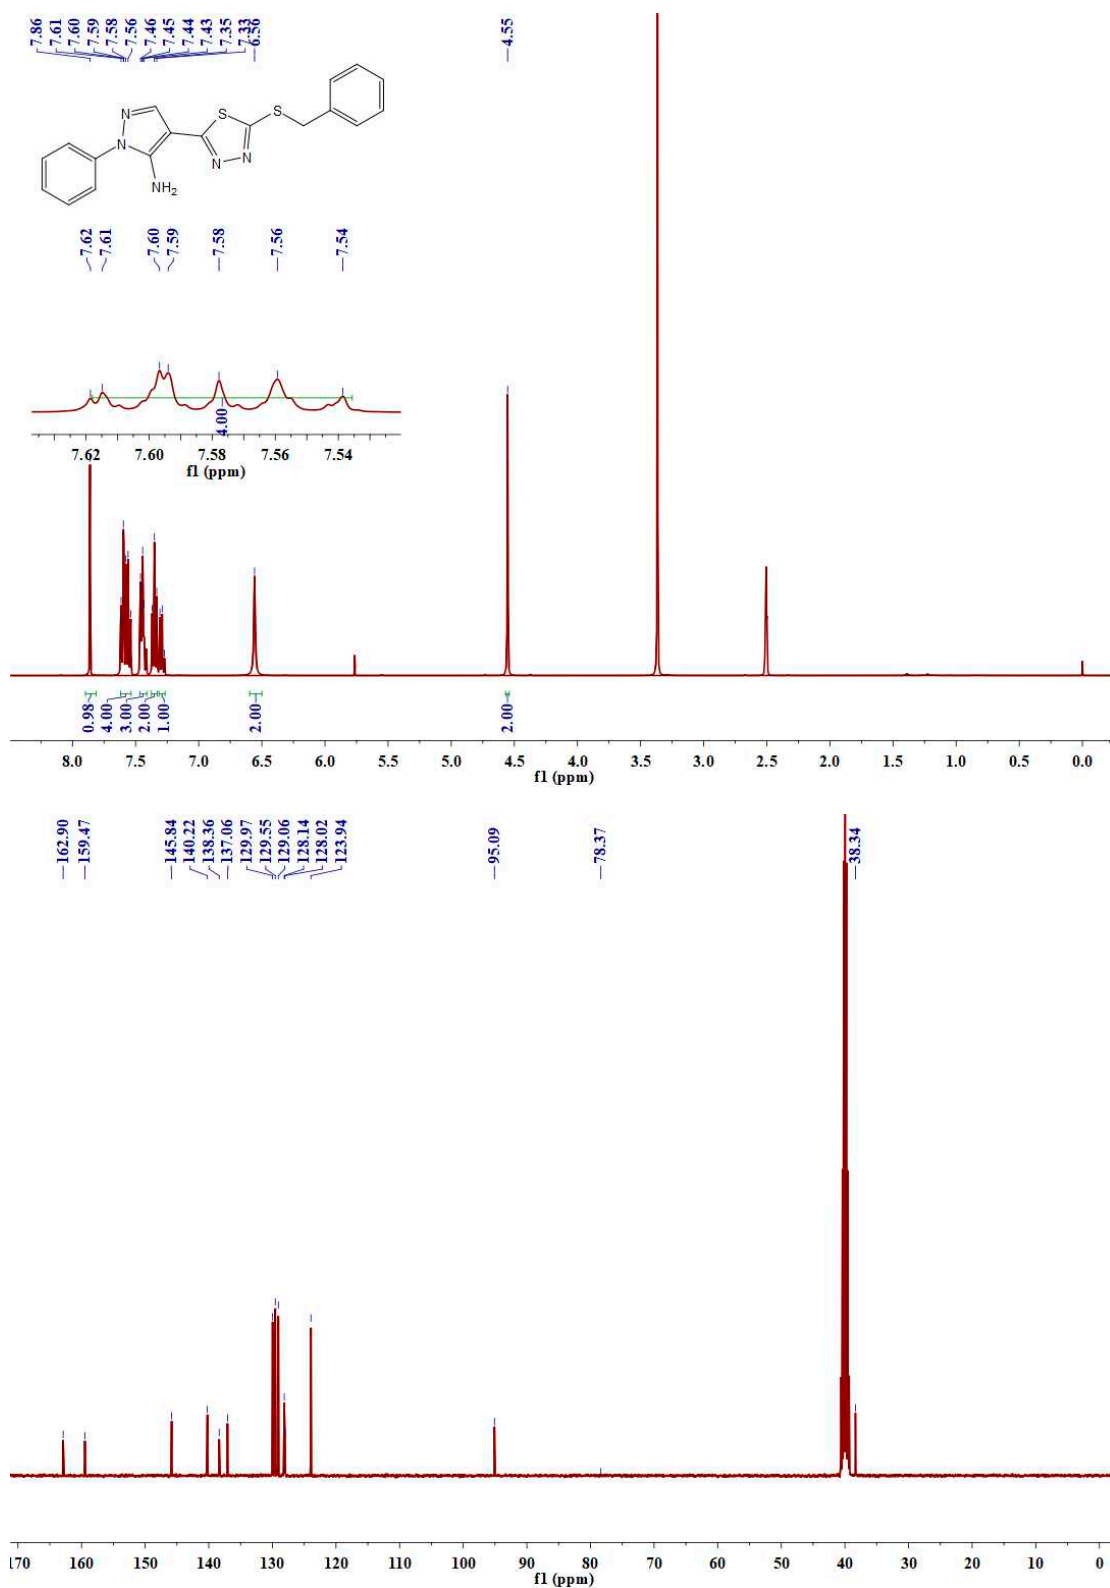

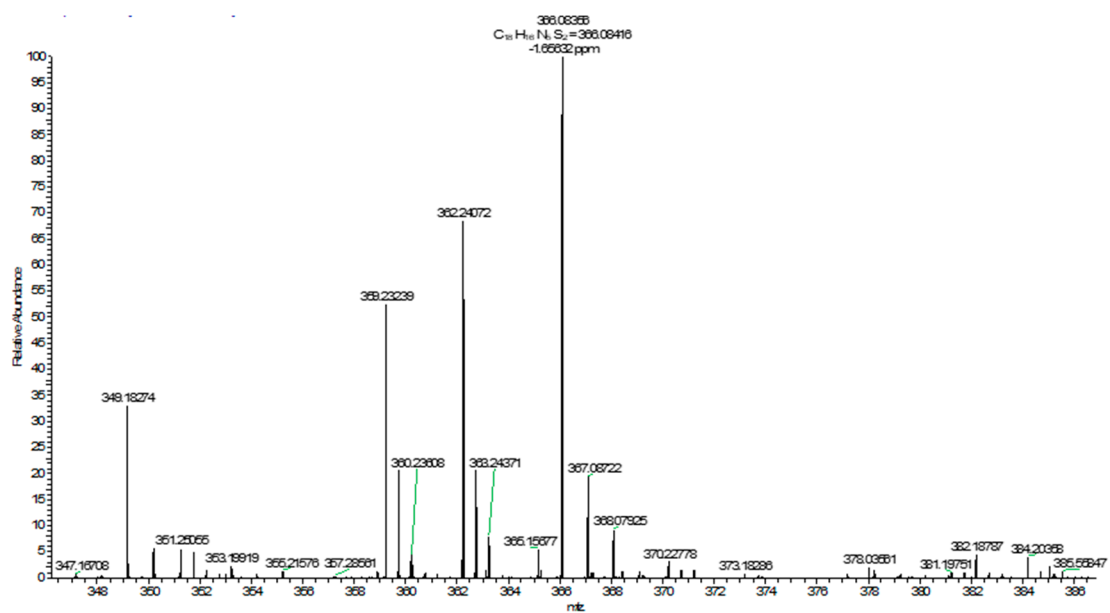

Figure S20.  $^1H$  NMR,  $^{13}C$  NMR and HRMS for title compound E15.

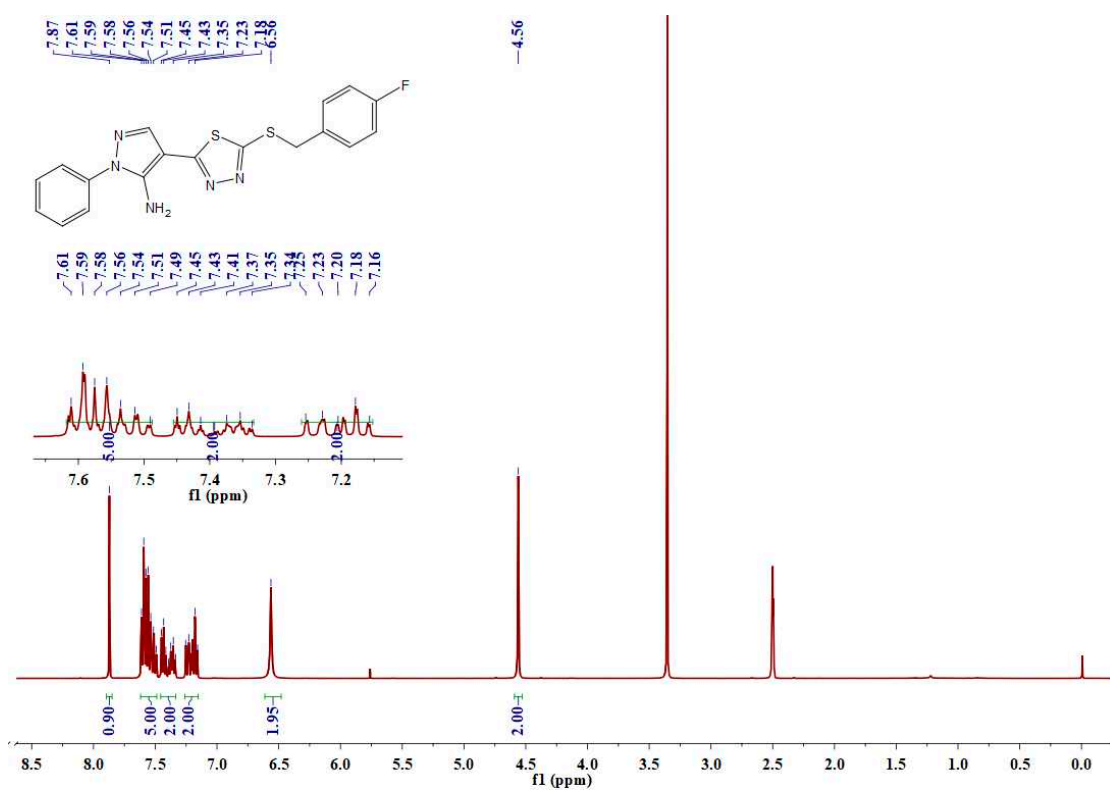

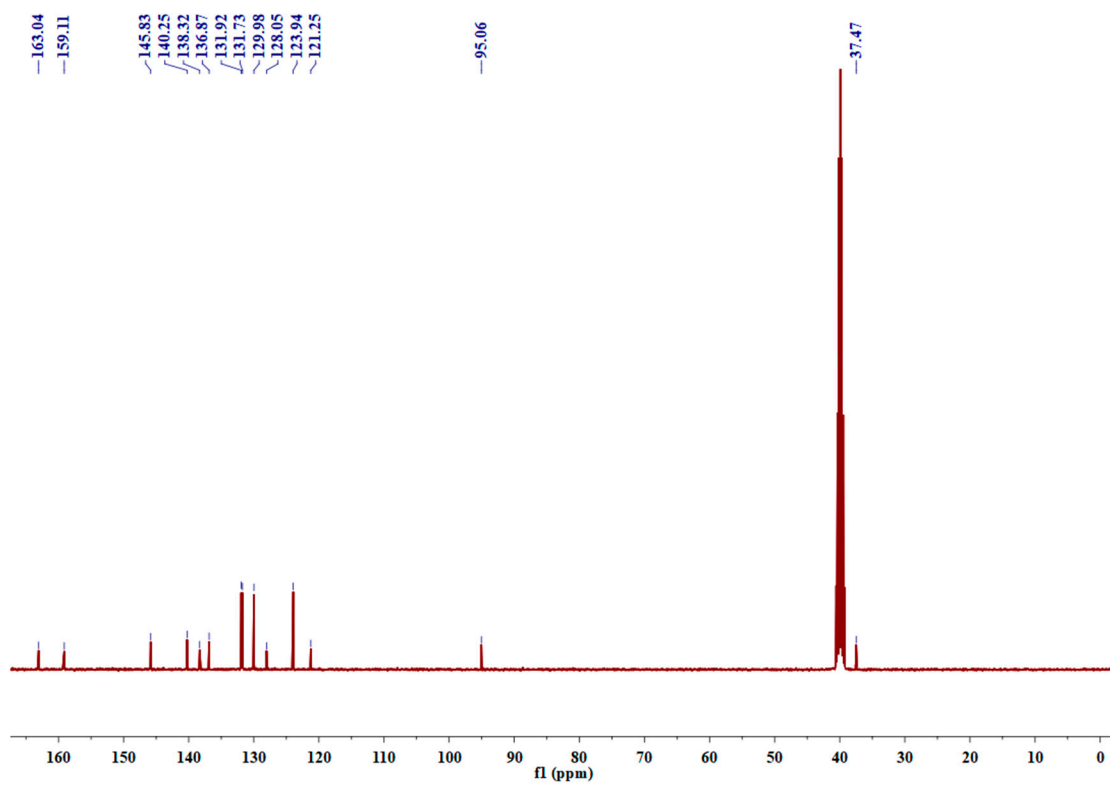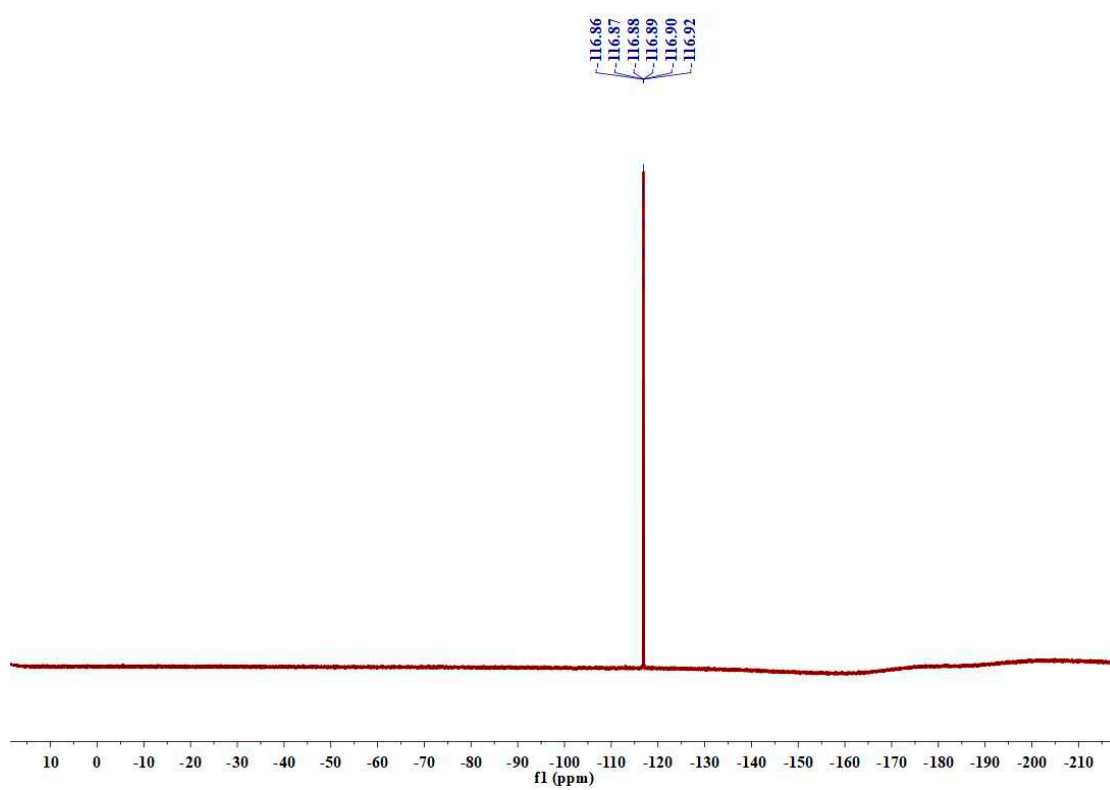



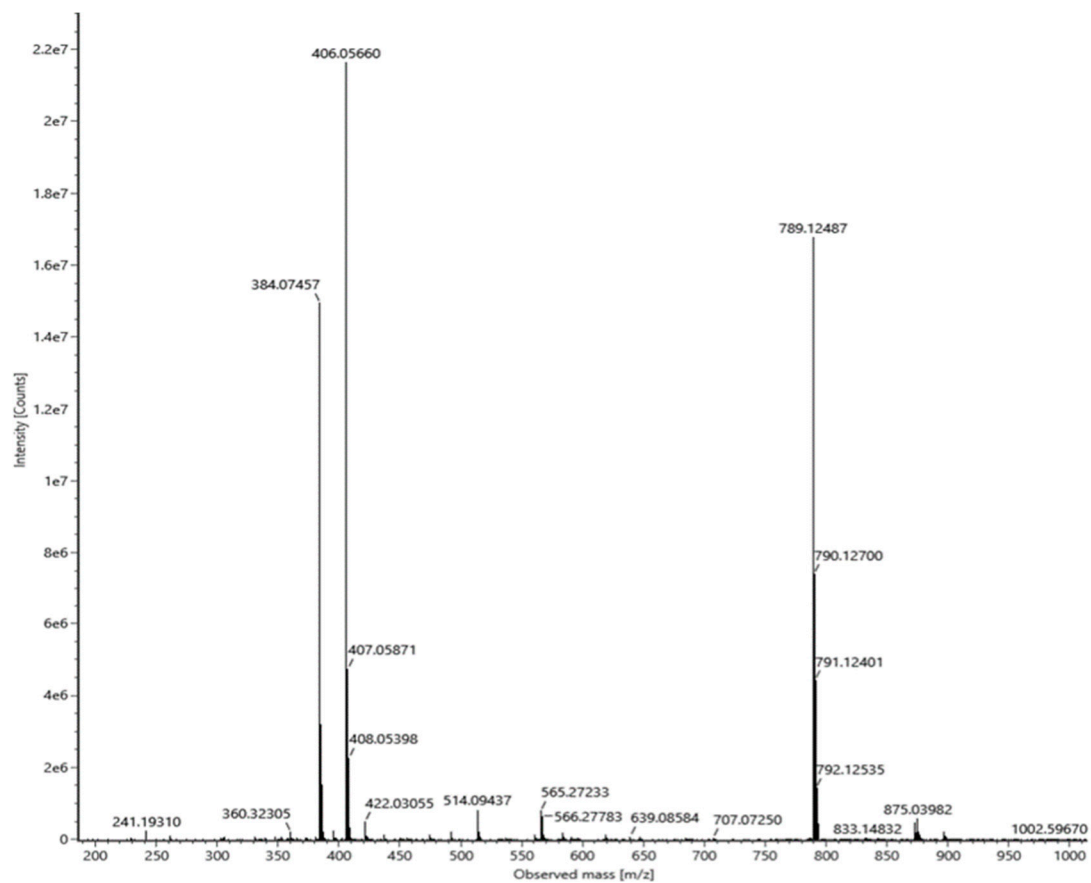

Figure S21.  $^1\text{H}$  NMR,  $^{13}\text{C}$  NMR and HRMS for title compound E<sub>16</sub>.

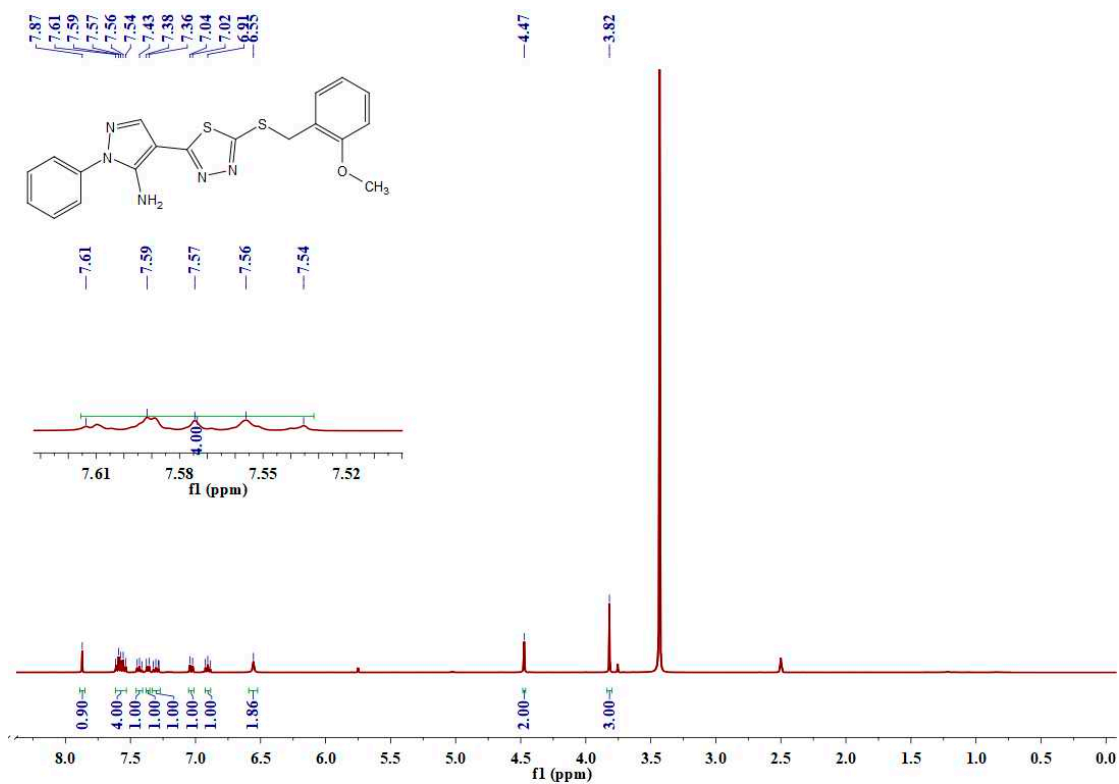

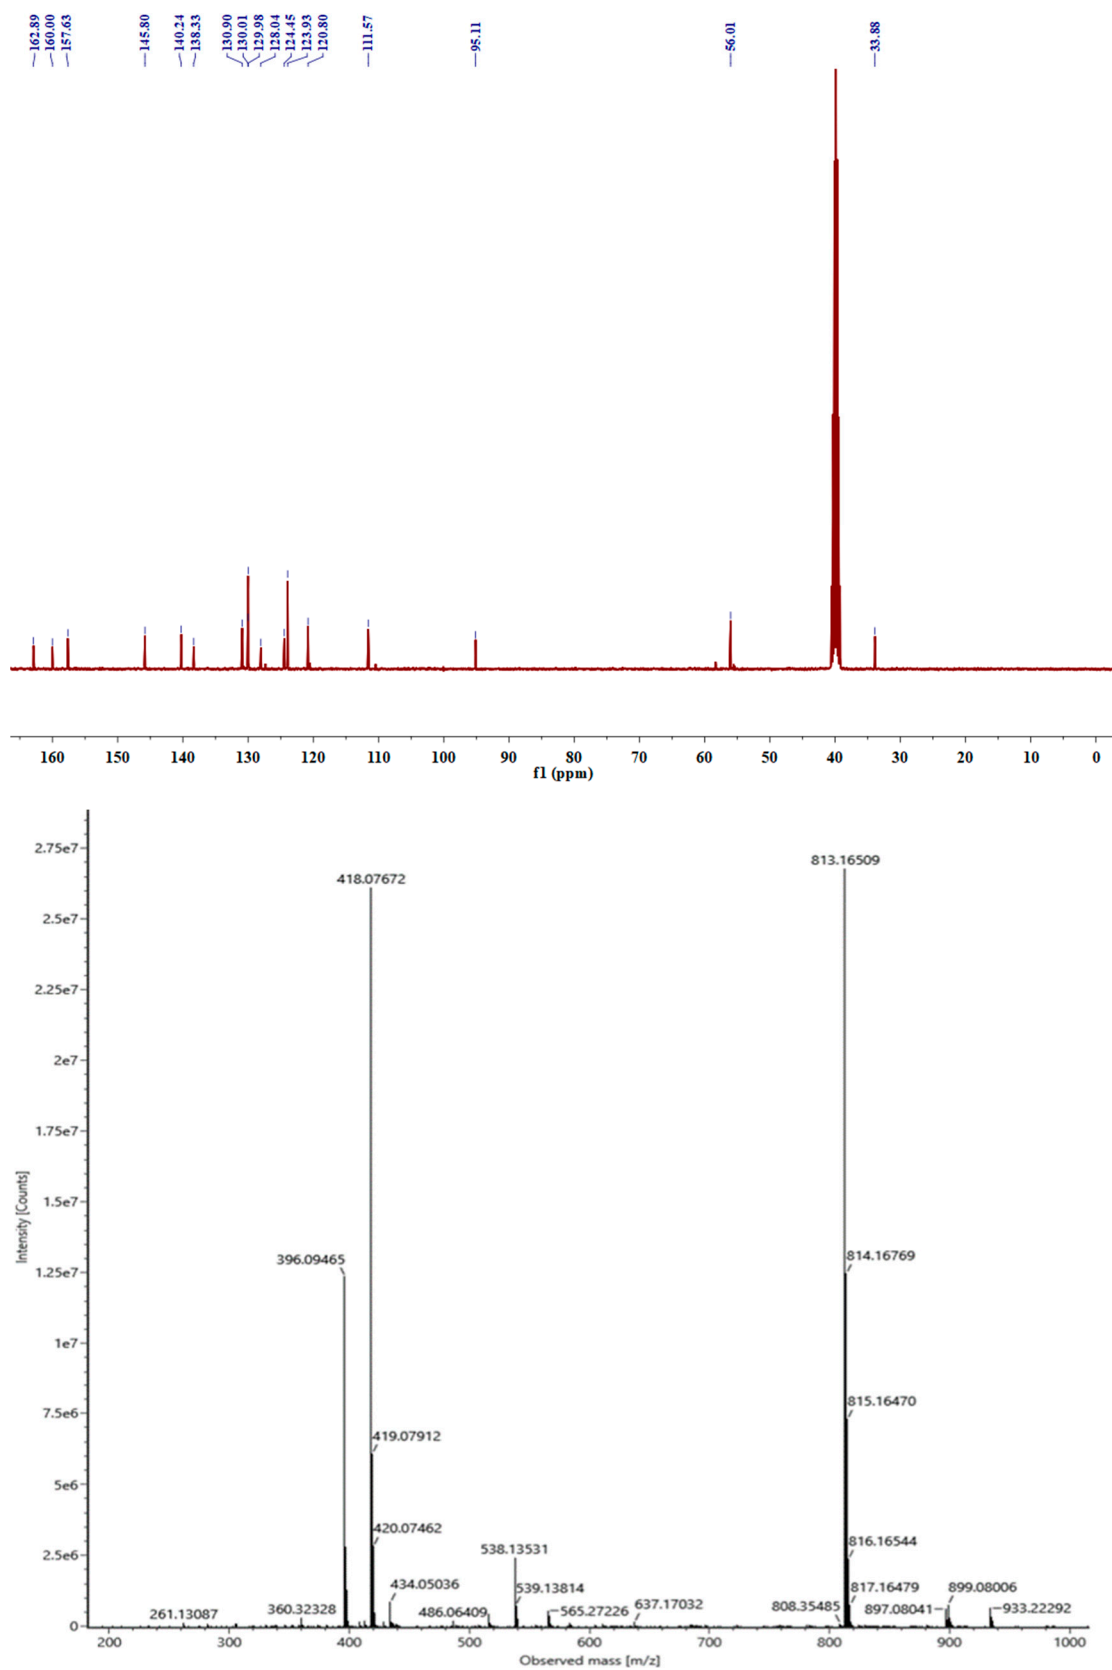

Figure S22. <sup>1</sup>H NMR, <sup>13</sup>C NMR and HRMS for title compound E17.

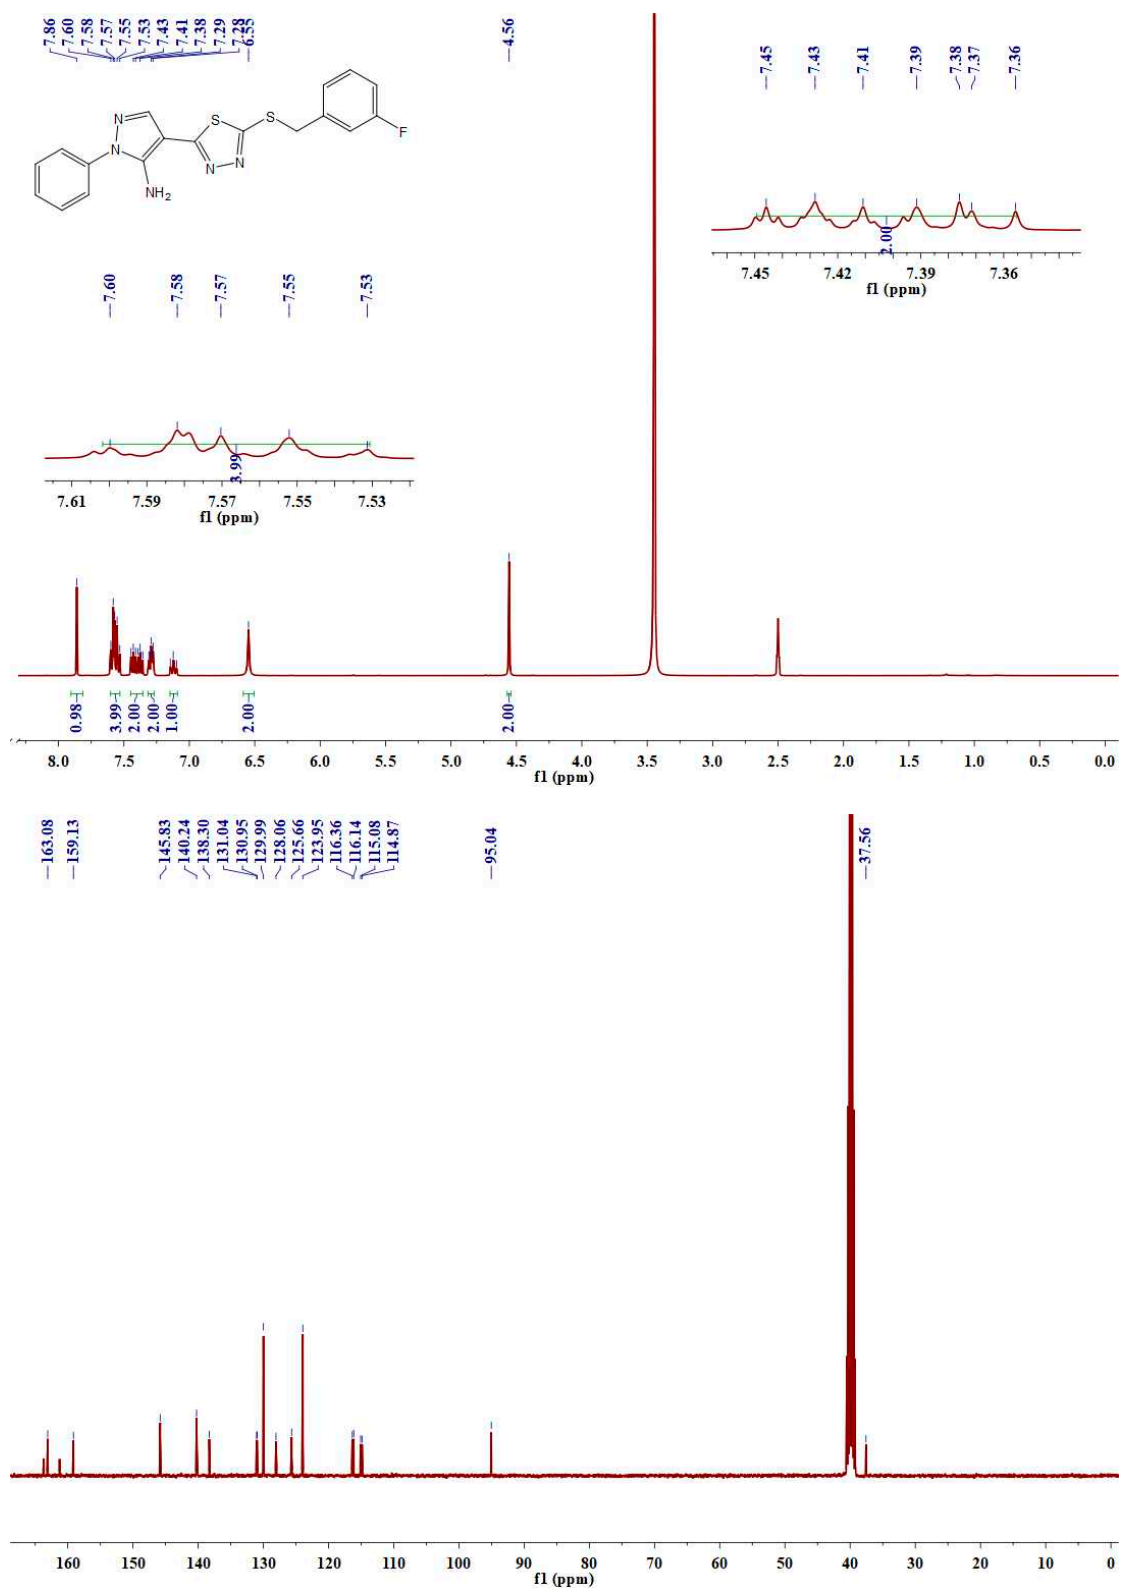

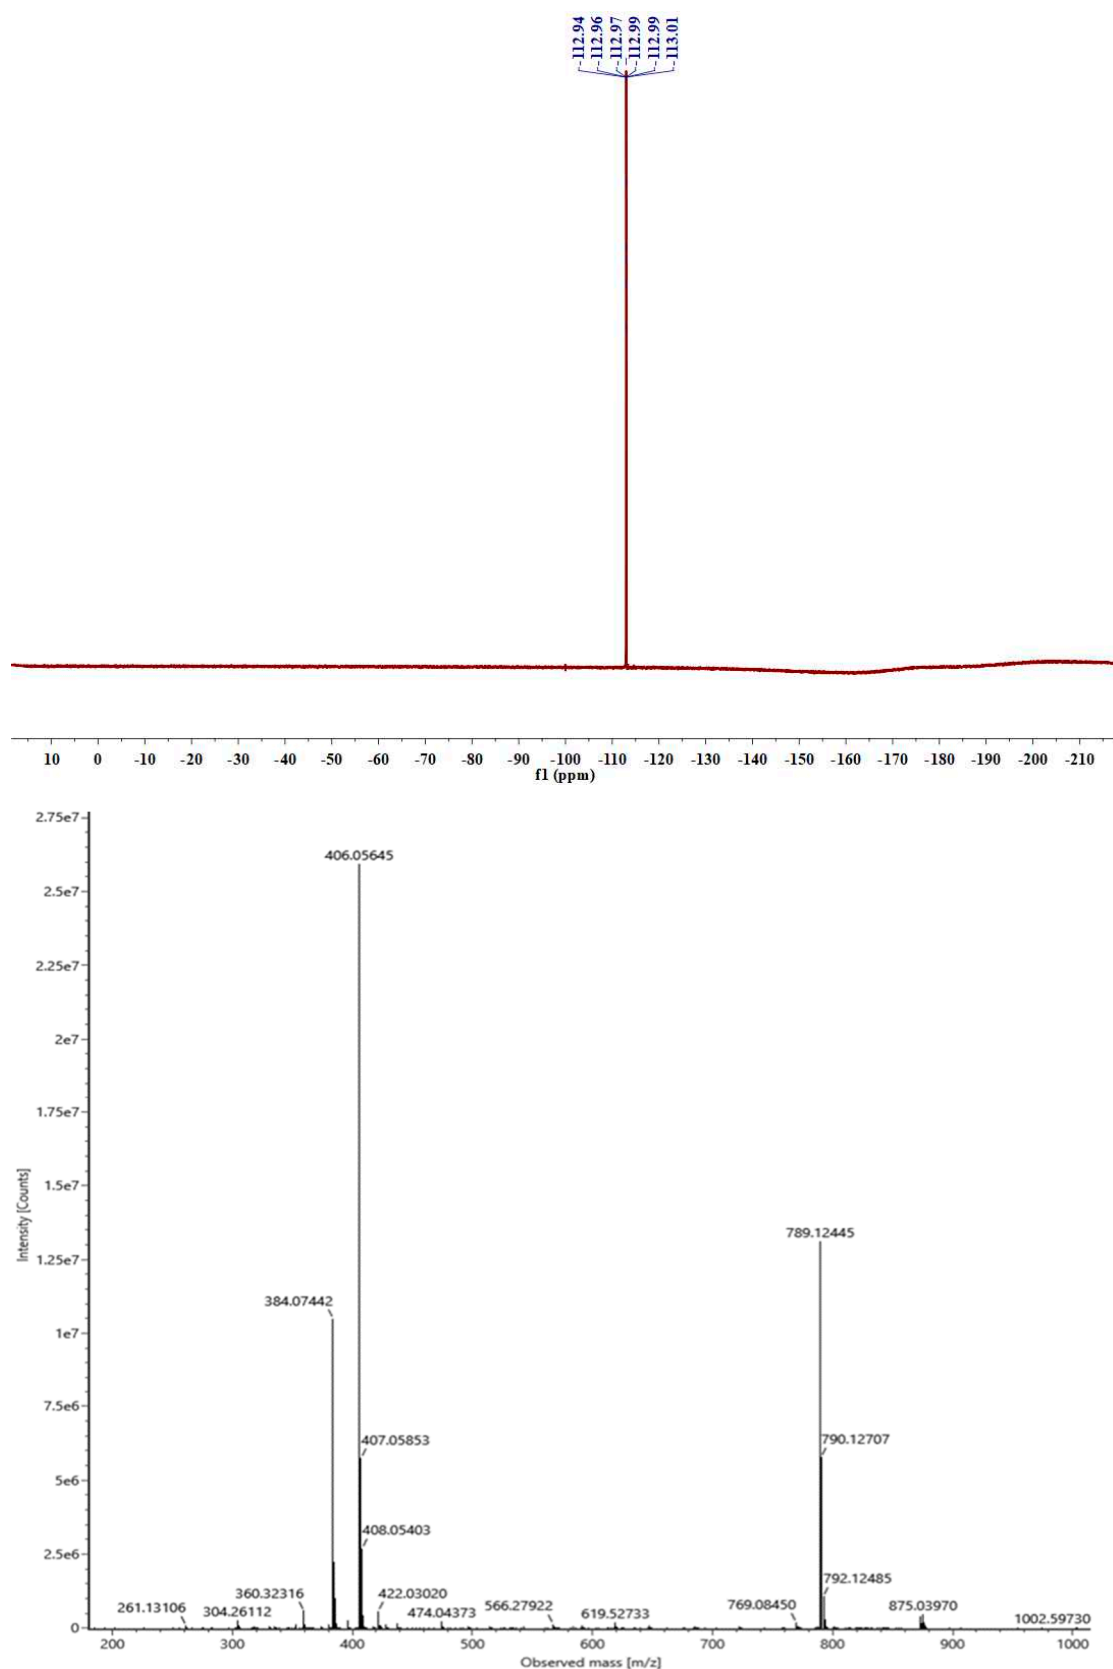

**Figure S23.**  $^1\text{H}$  NMR,  $^{13}\text{C}$  NMR,  $^{19}\text{F}$  NMR and HRMS for title compound **E18**.

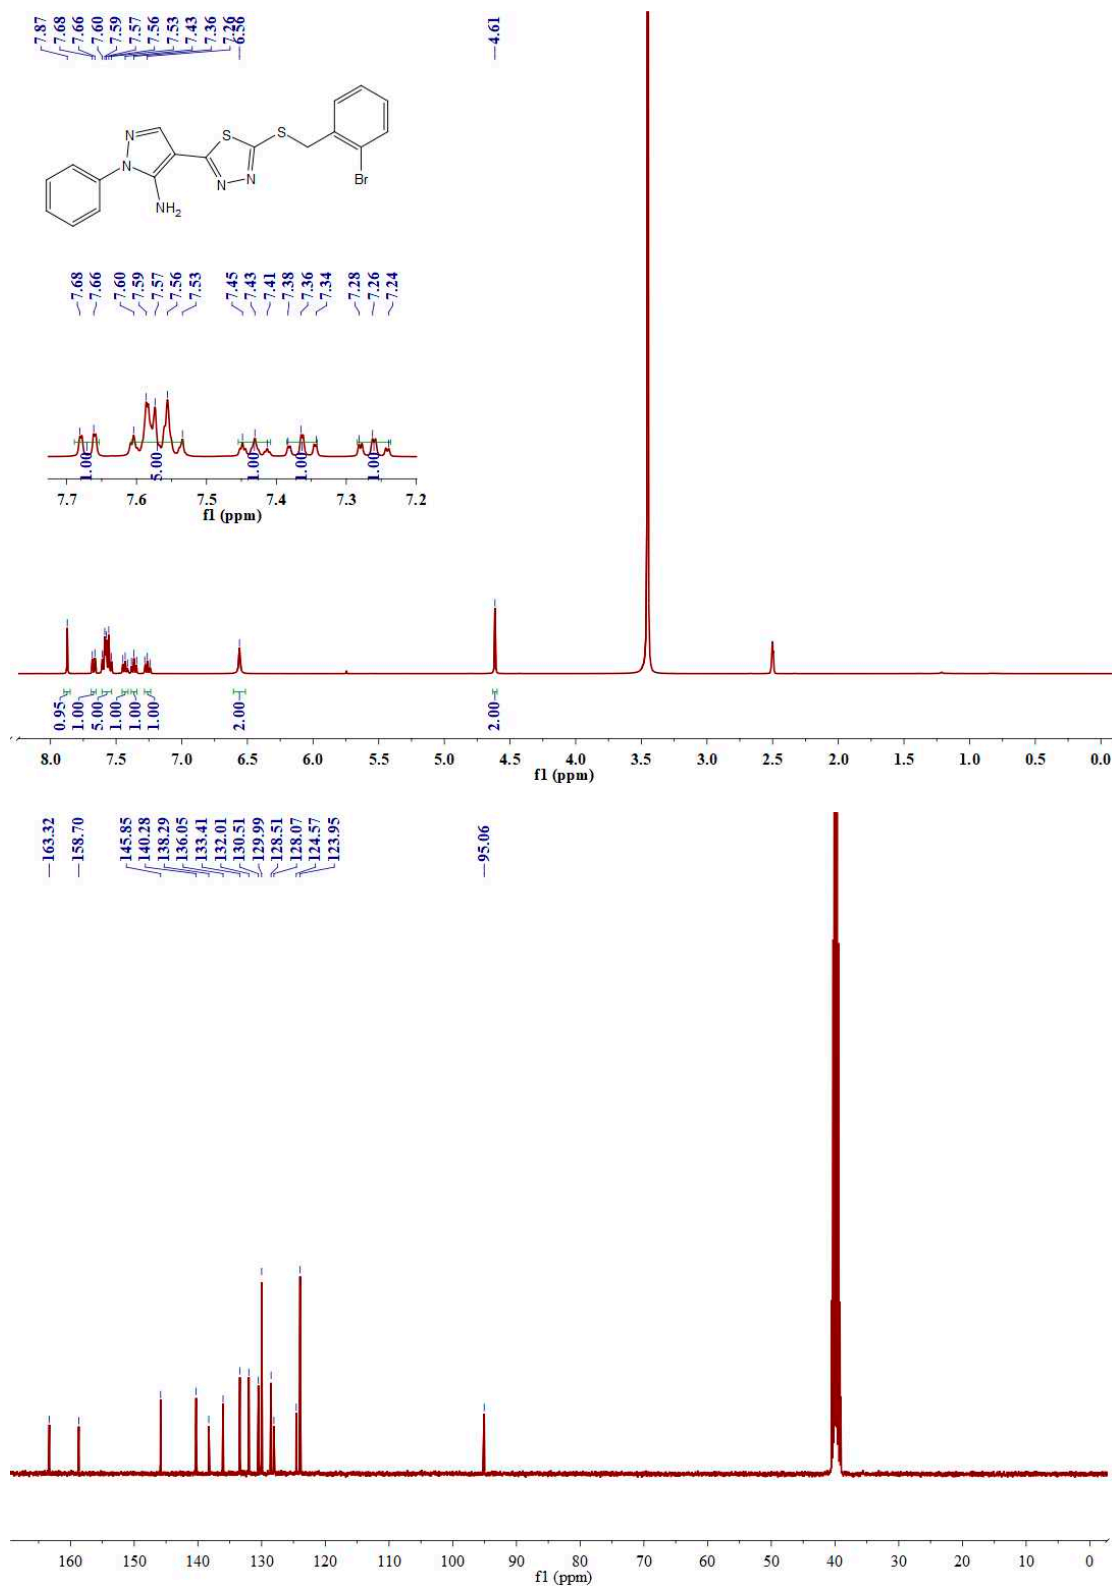

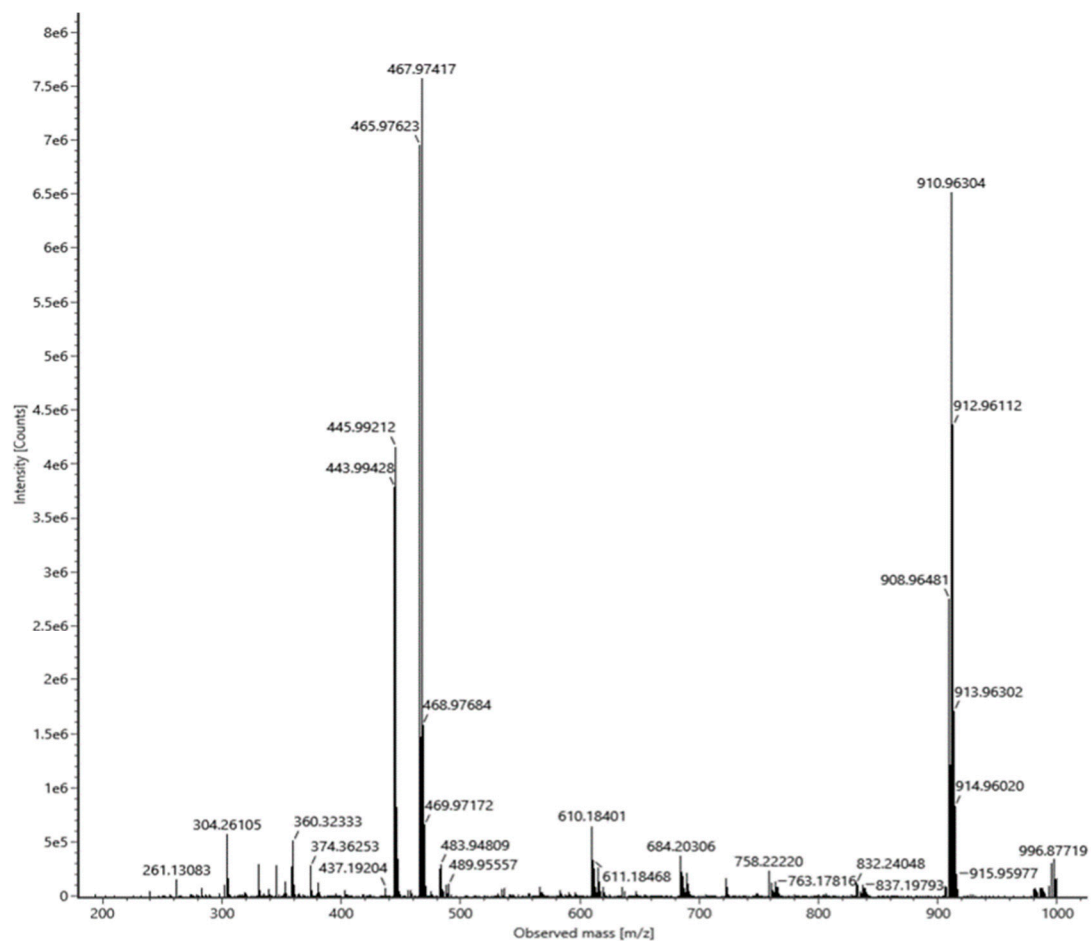

Figure S24.  $^1\text{H}$  NMR,  $^{13}\text{C}$  NMR and HRMS for title compound E19.

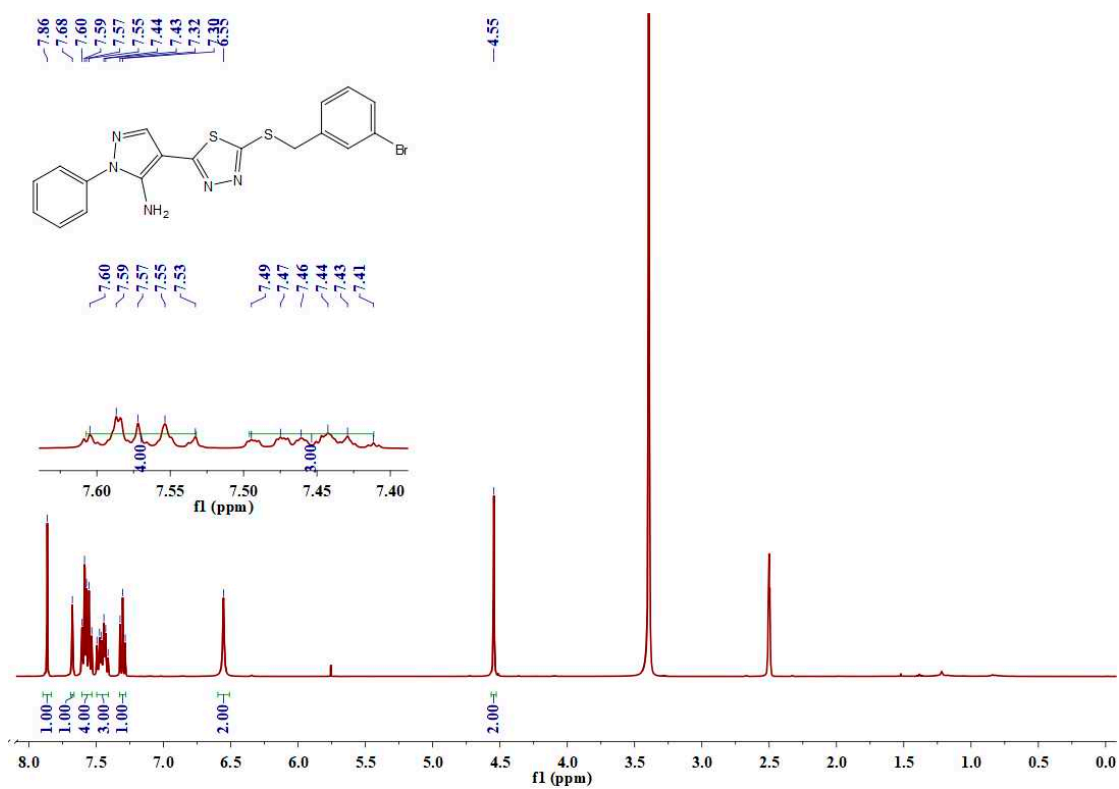

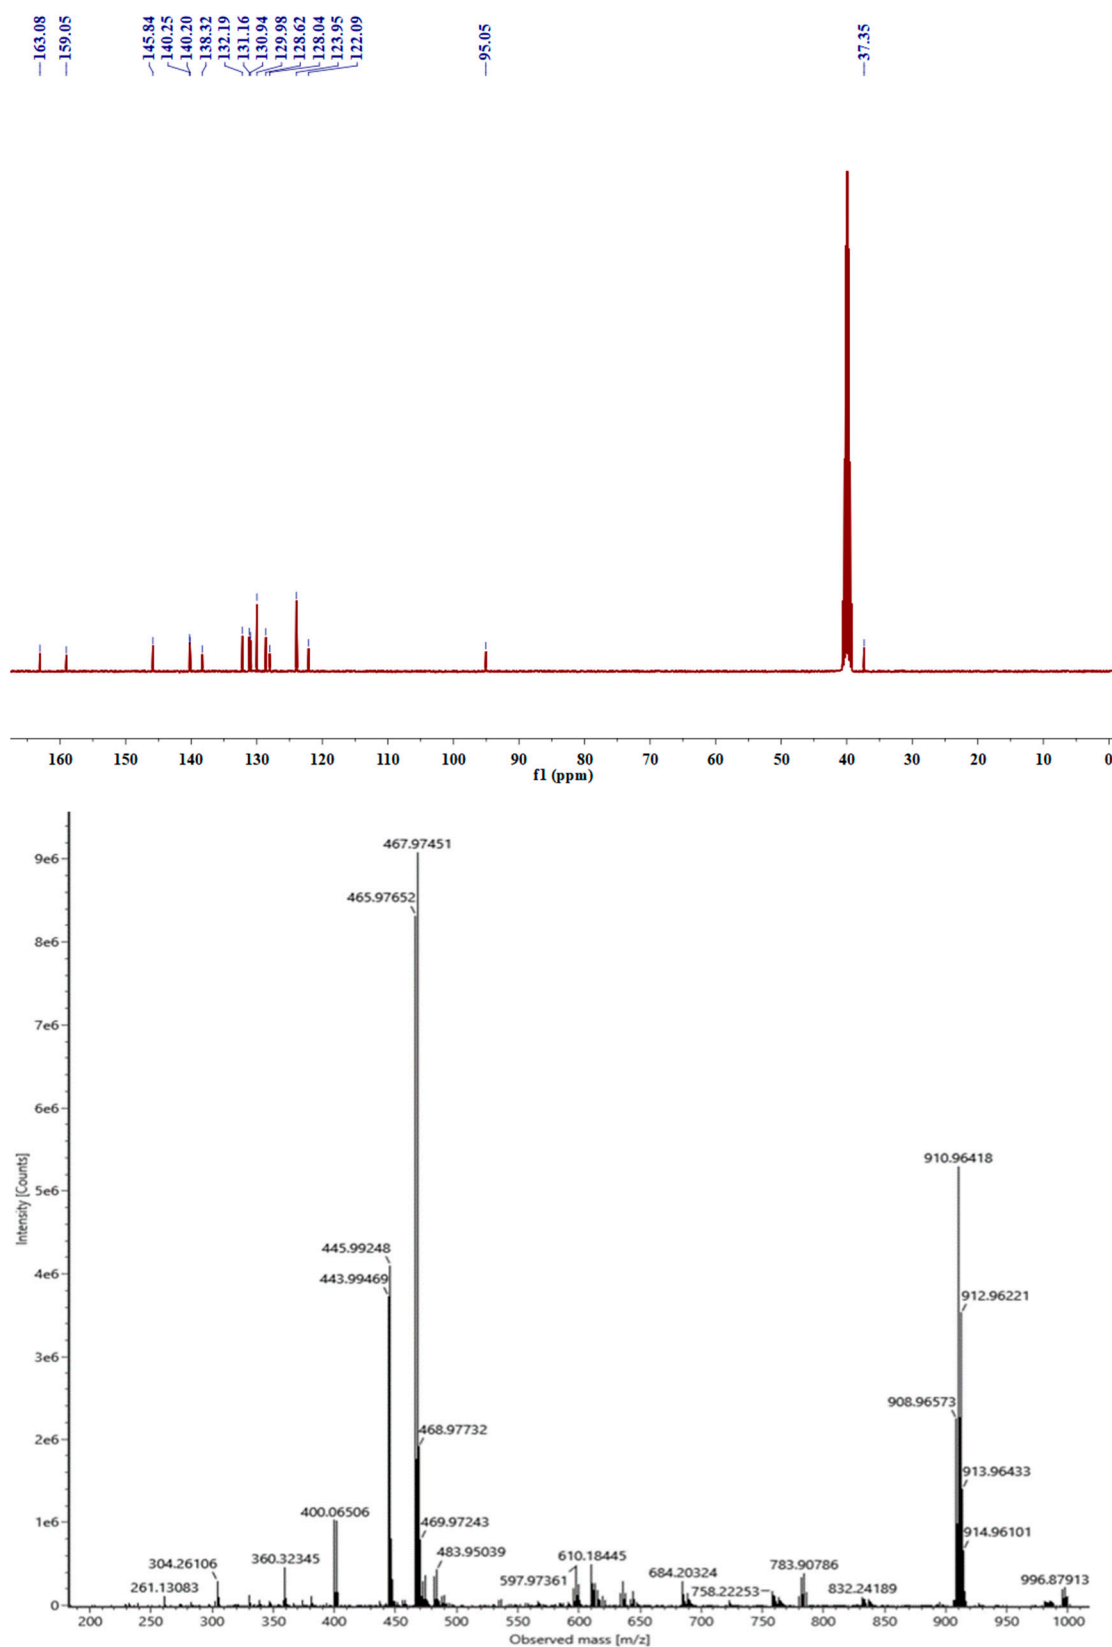

Figure S25. <sup>1</sup>H NMR, <sup>13</sup>C NMR and HRMS for title compound E20.

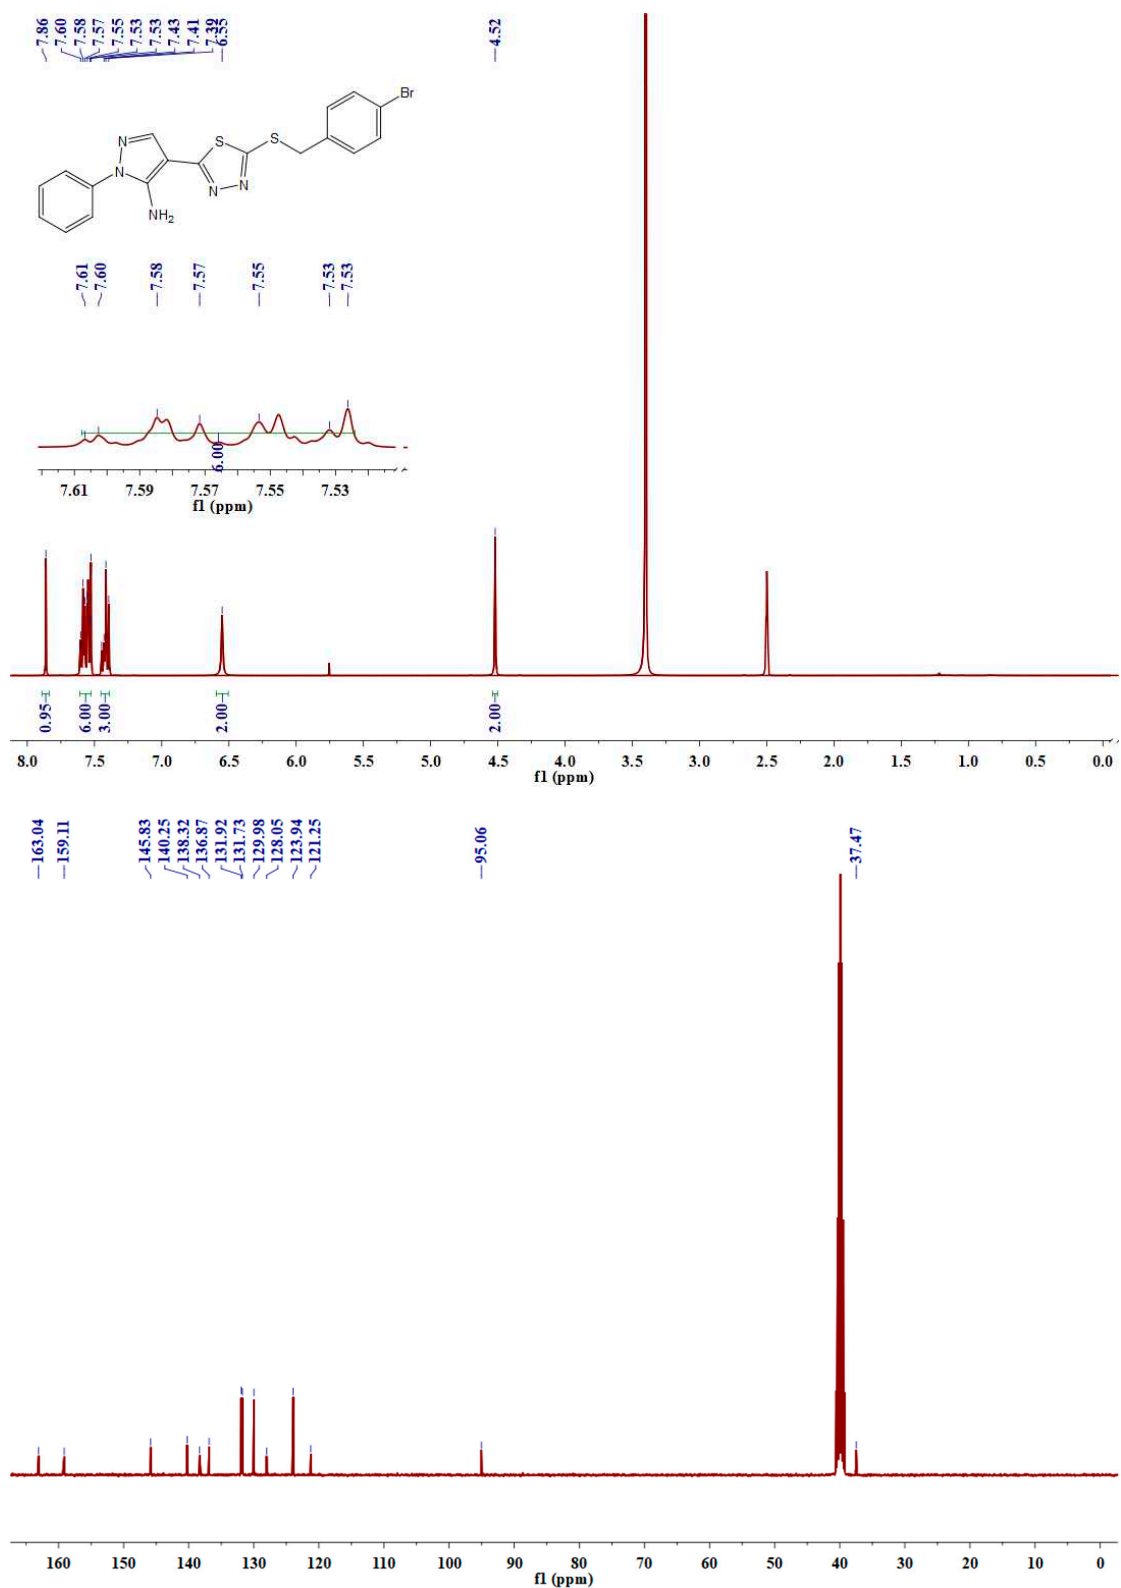



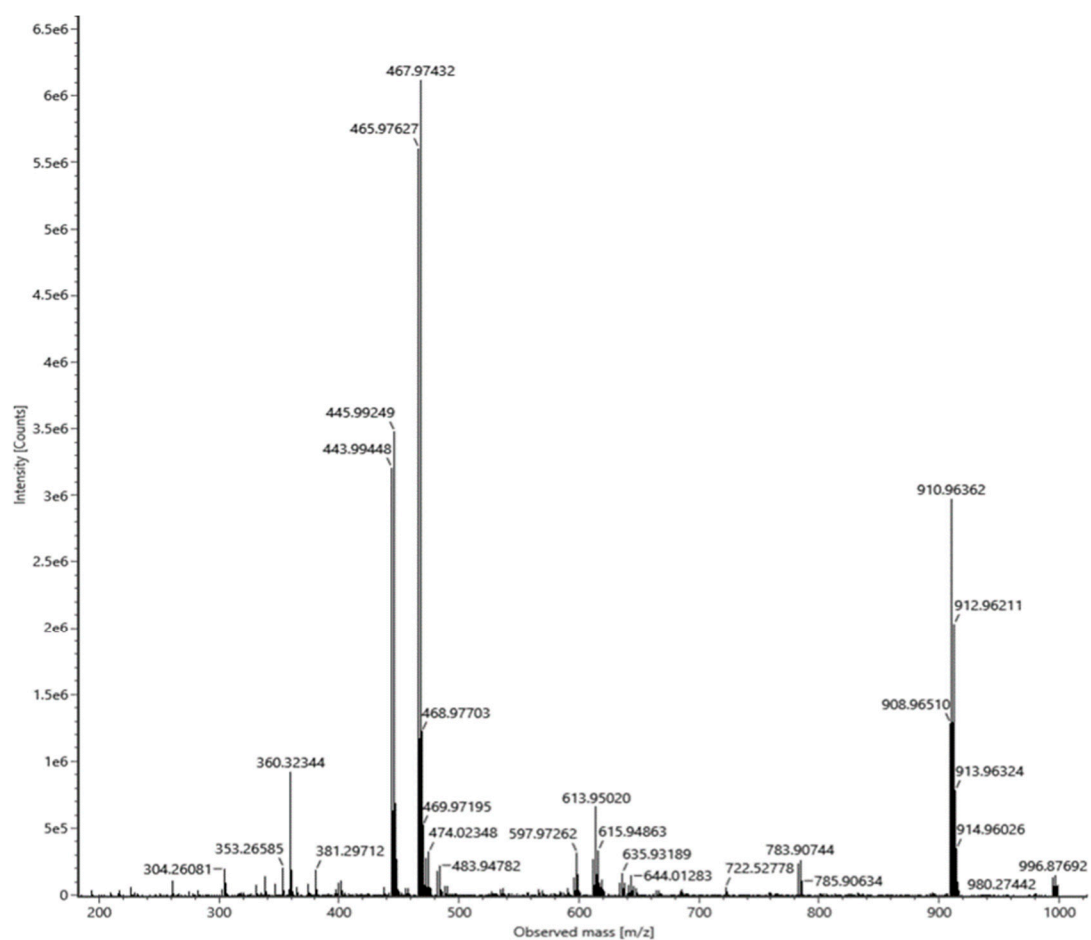

Figure S26.  $^1\text{H}$  NMR,  $^{13}\text{C}$  NMR and HRMS for title compound E21.

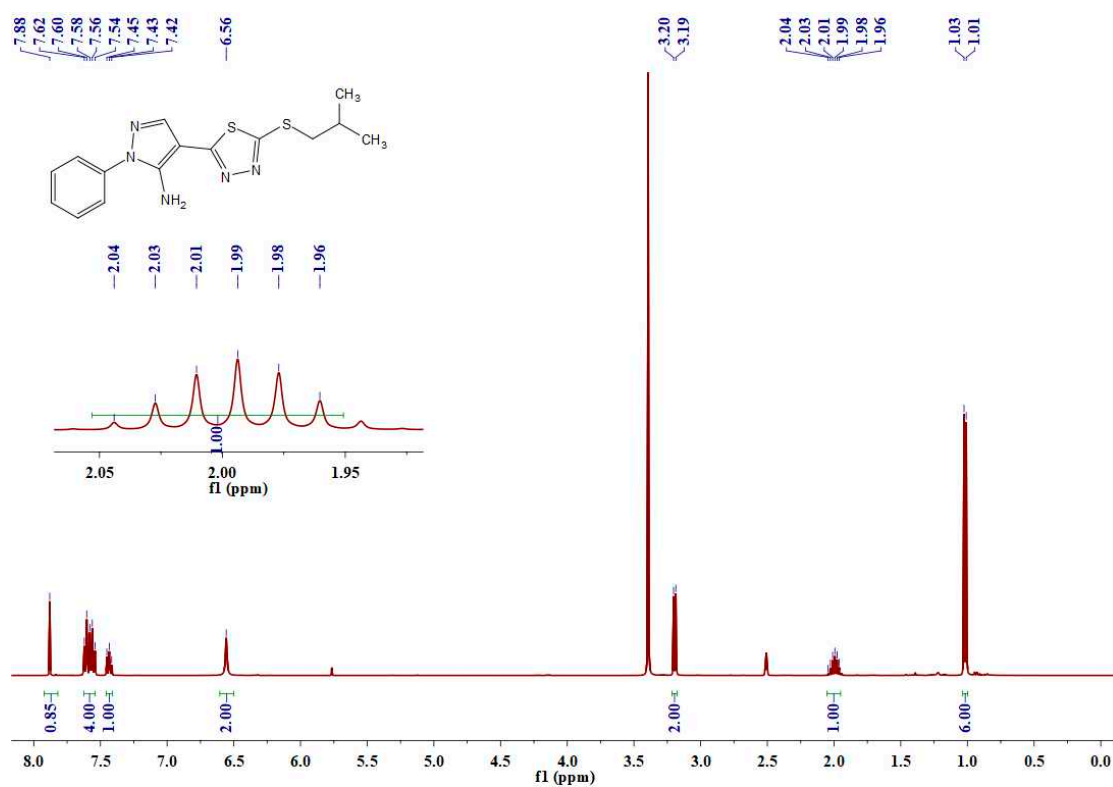

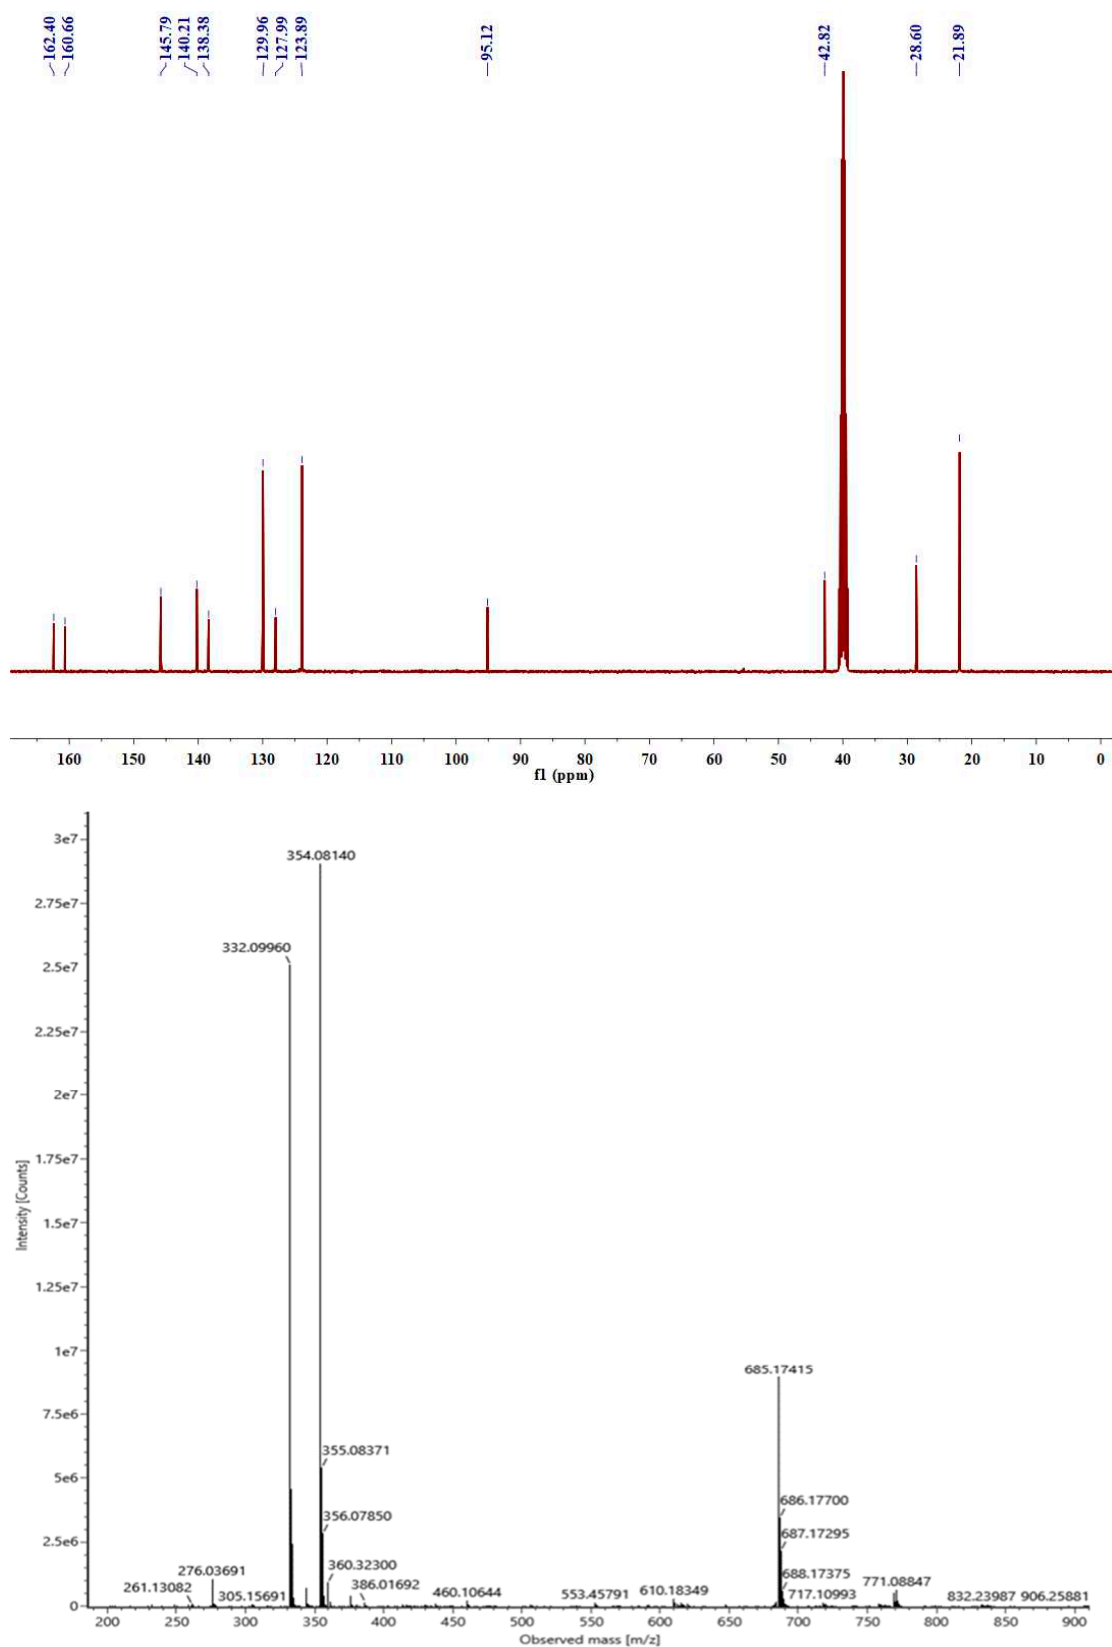

Figure S27. <sup>1</sup>H NMR, <sup>13</sup>C NMR and HRMS for title compound E22.

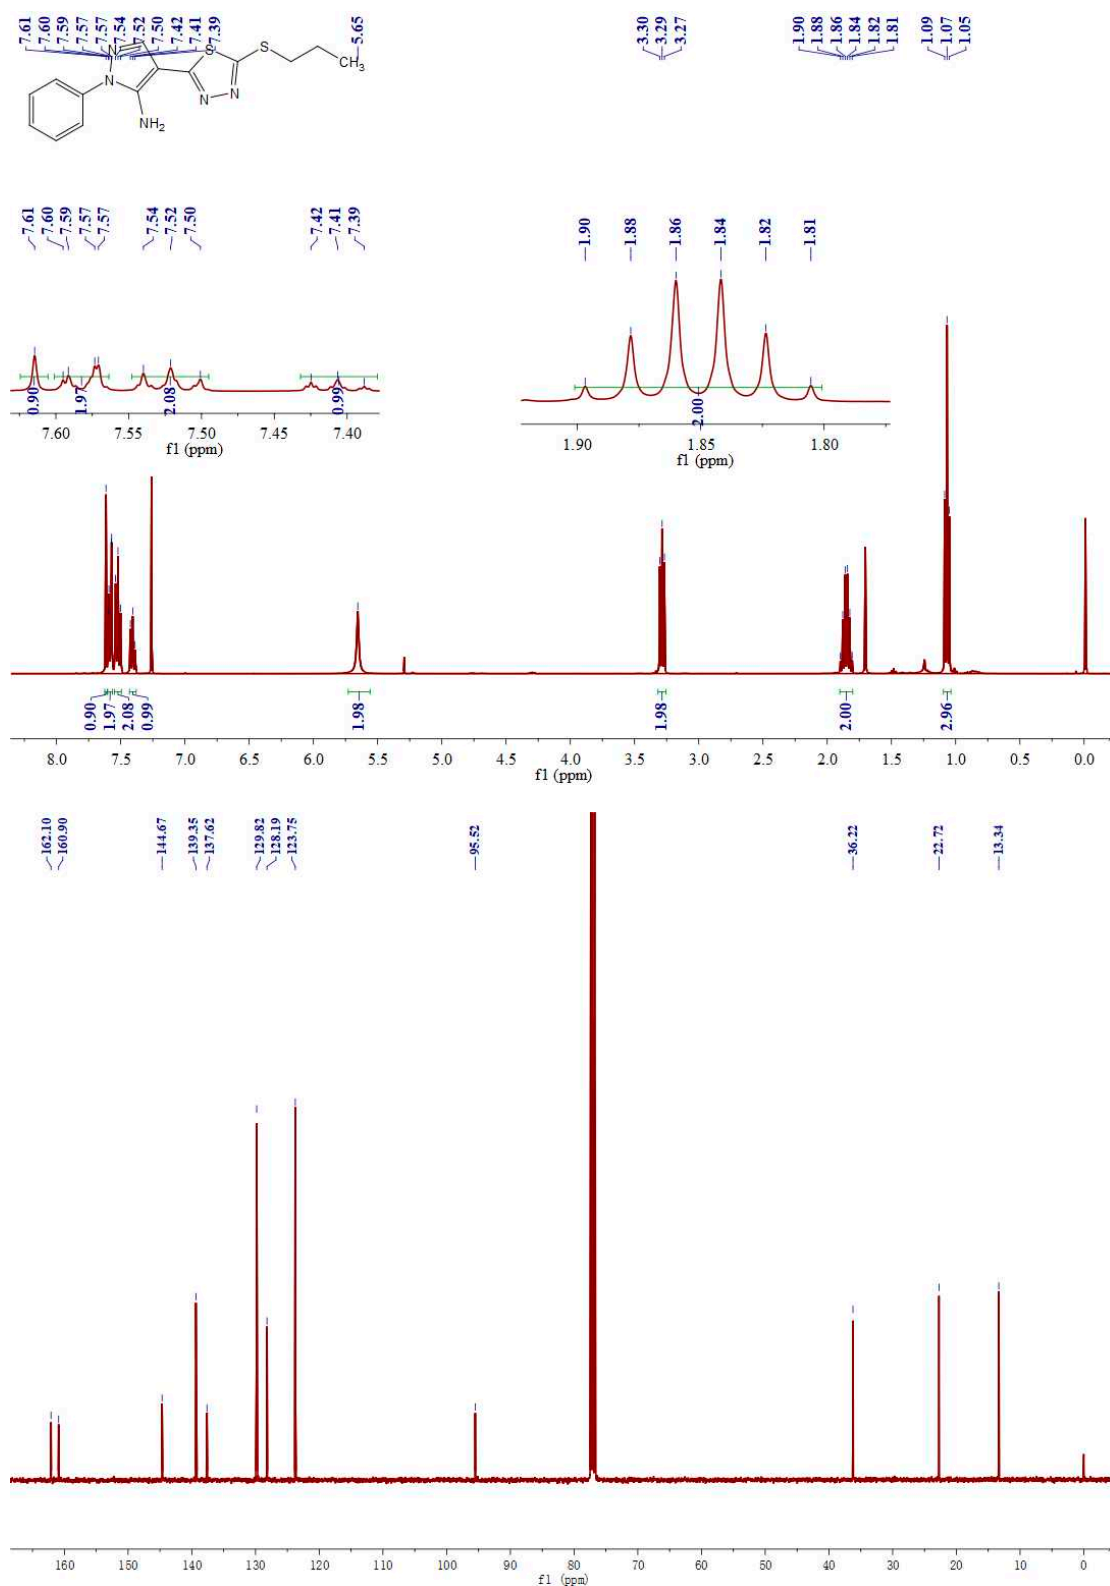

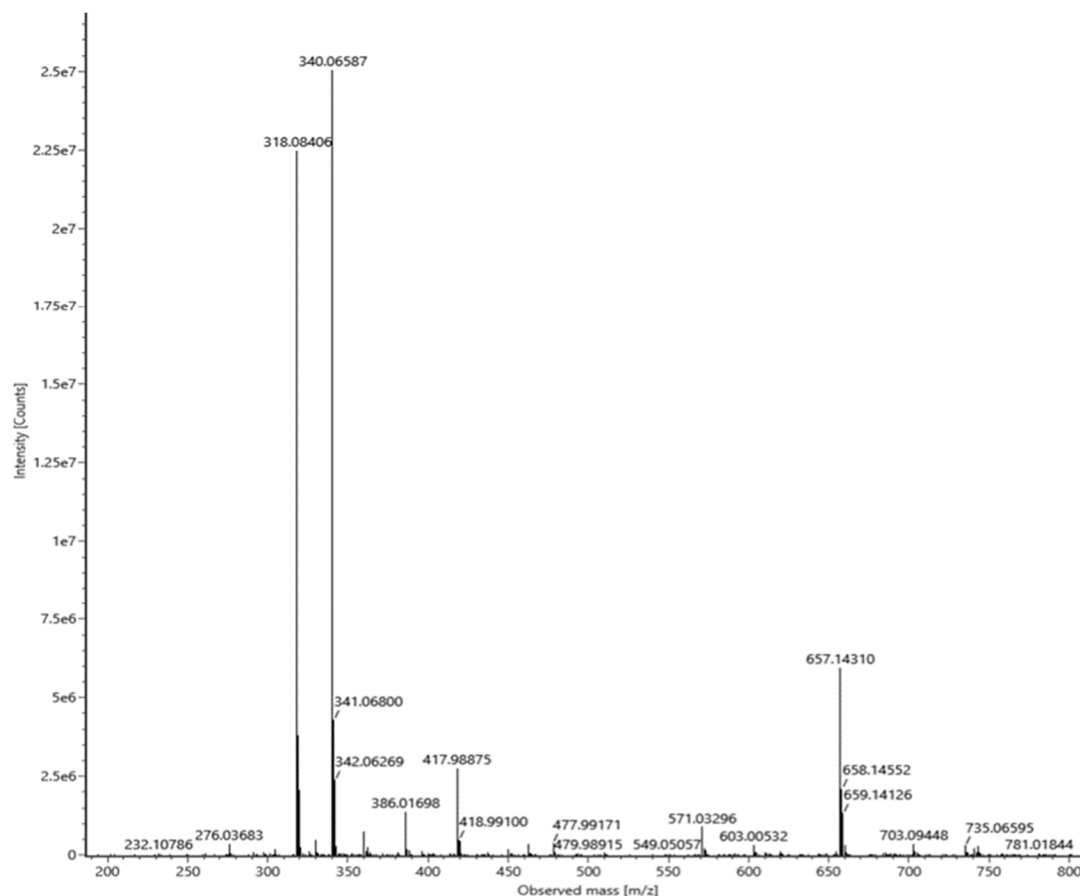

**Figure S28.**  $^1\text{H}$  NMR,  $^{13}\text{C}$  NMR and HRMS for title compound E23.

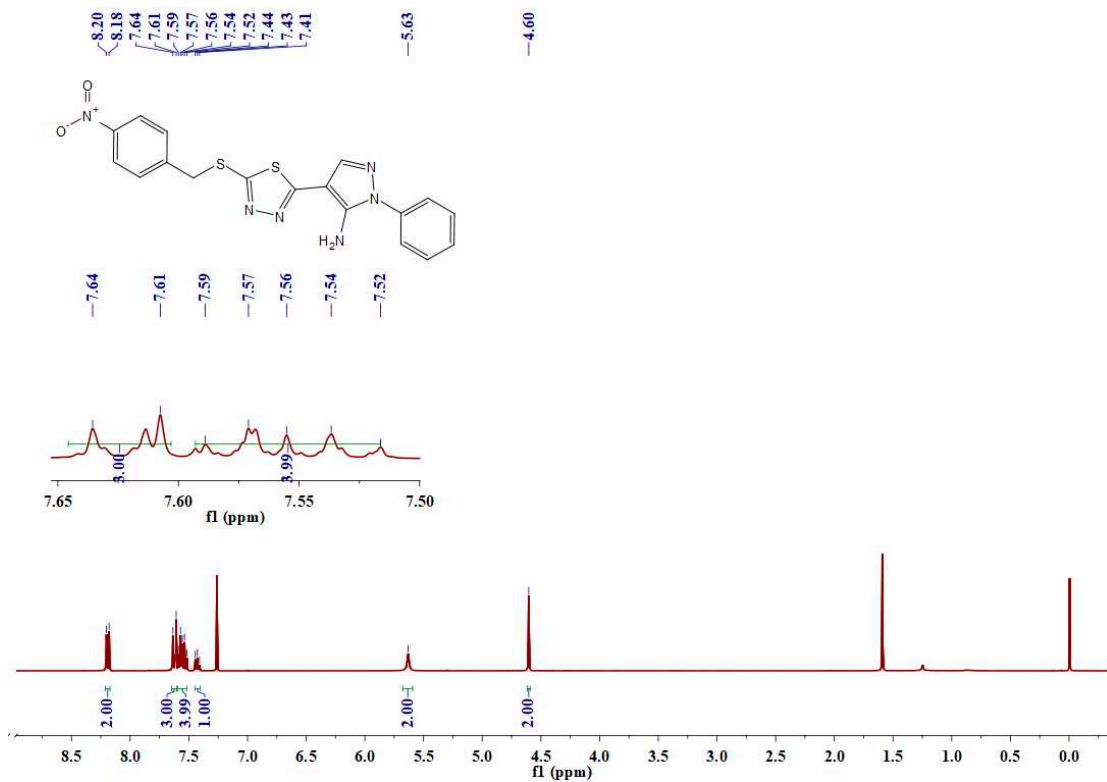

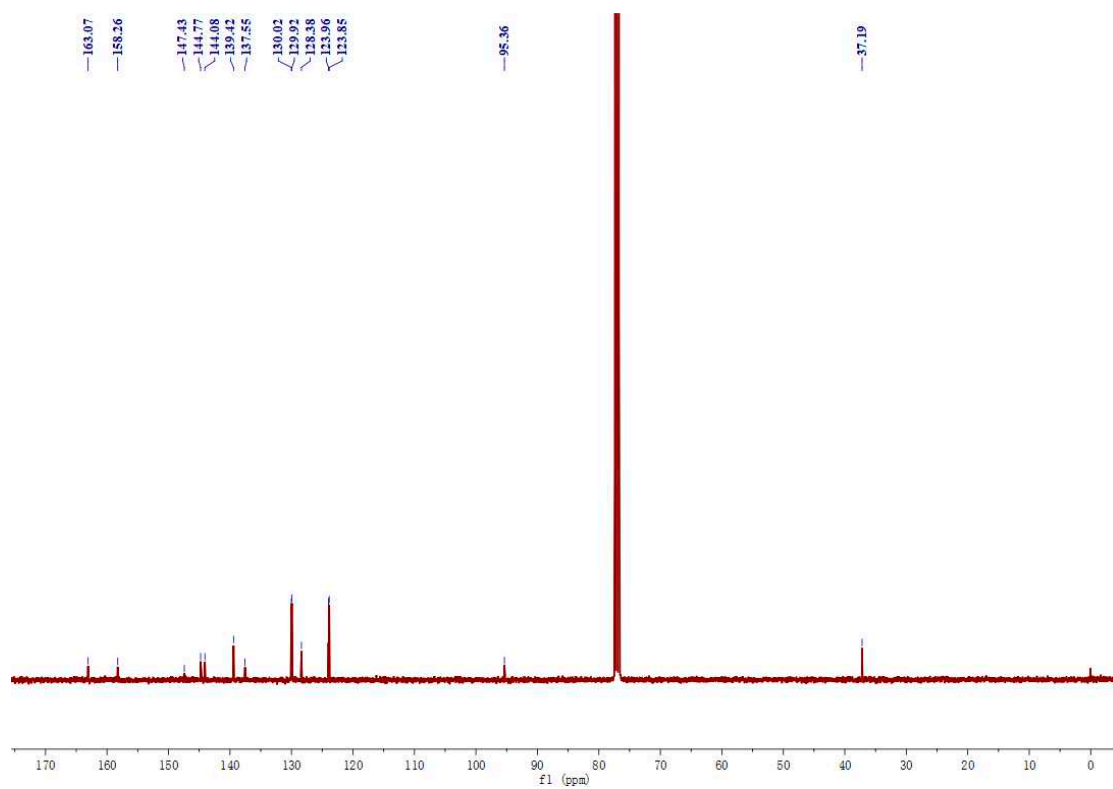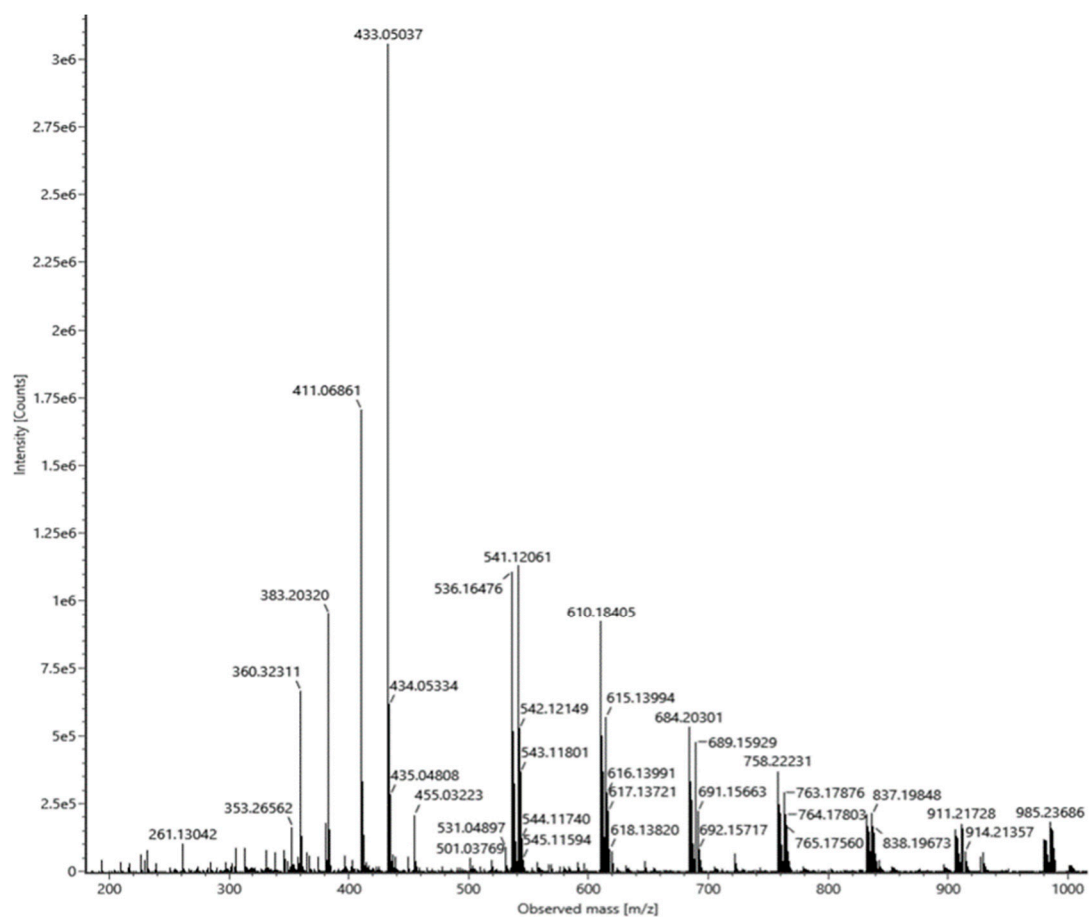

**Figure S29.** <sup>1</sup>H NMR, <sup>13</sup>C NMR and HRMS for title compound E24.

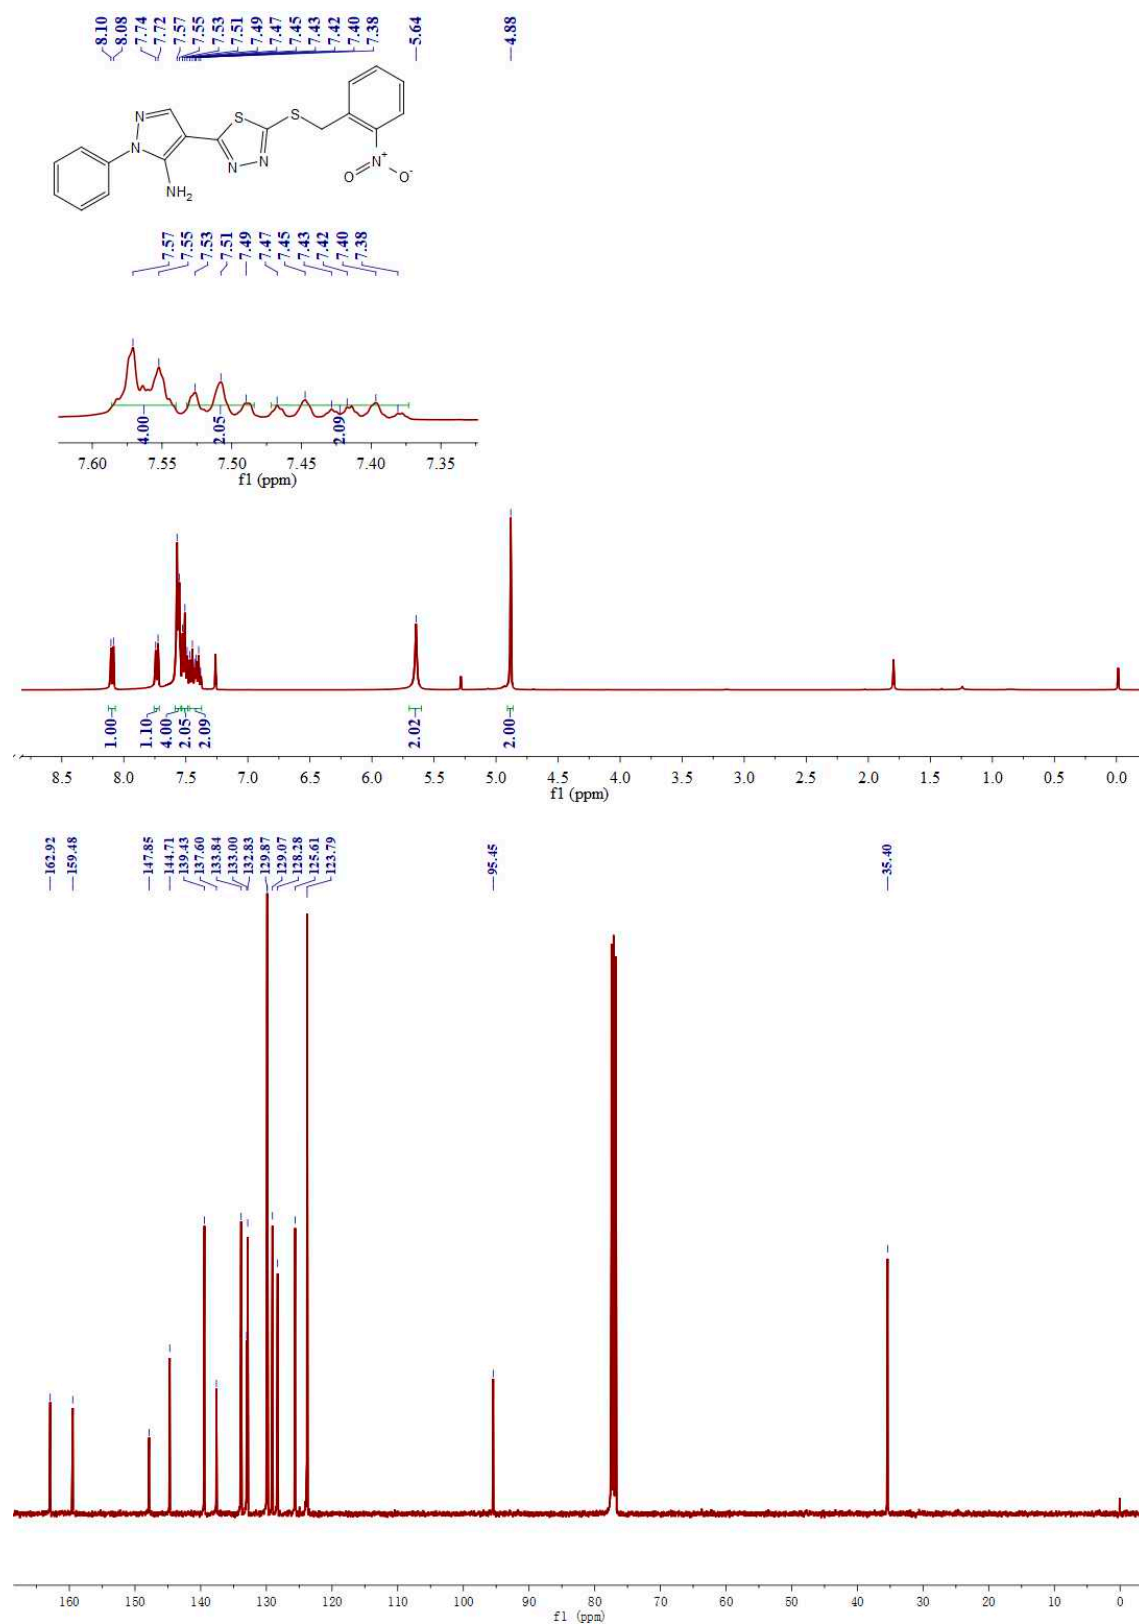

Item name: Z-1011  
Item description:

Channel name: 1: Average Time 0.1089 min : TOF MS (50-1500) ESI+ : Centroided : Combined

2.01e7

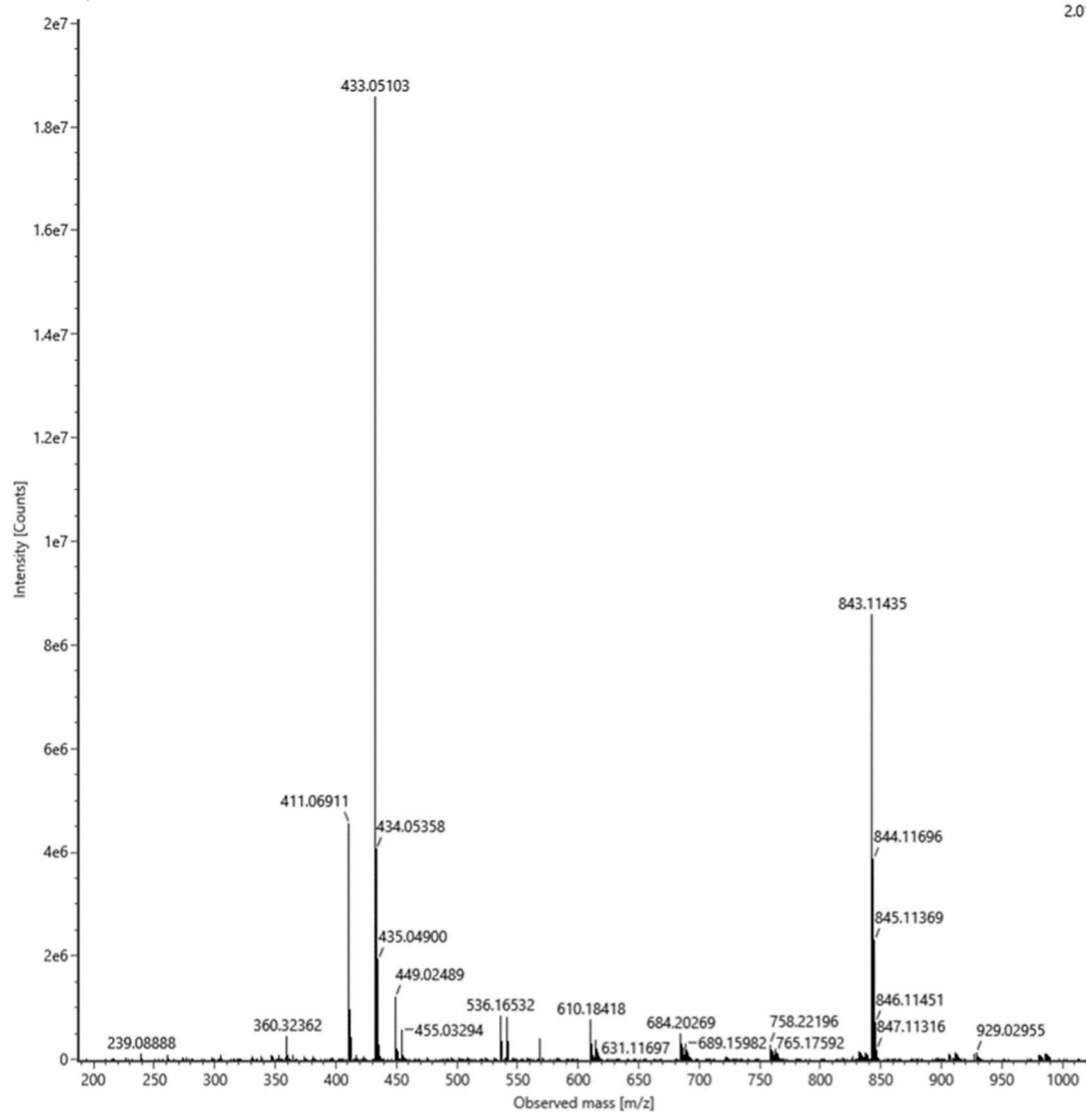

Figure S30.  $^1\text{H}$  NMR,  $^{13}\text{C}$  NMR and HRMS for title compound **E**<sub>25</sub>.

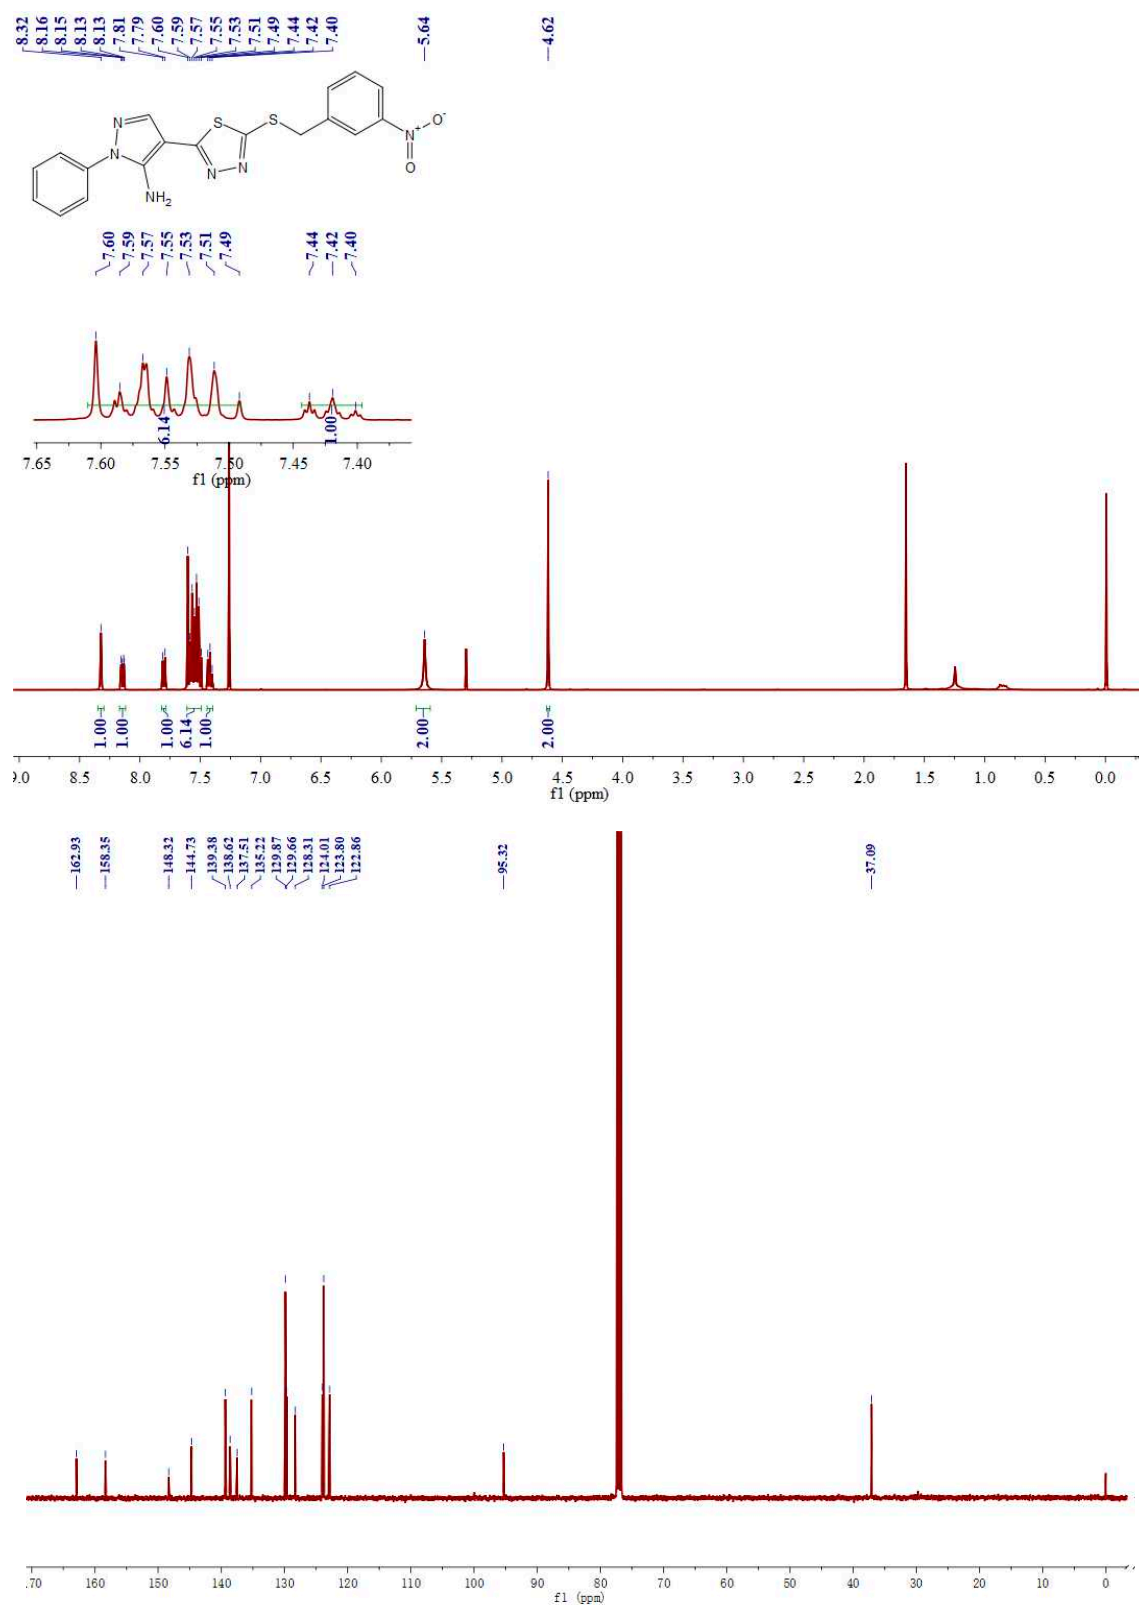



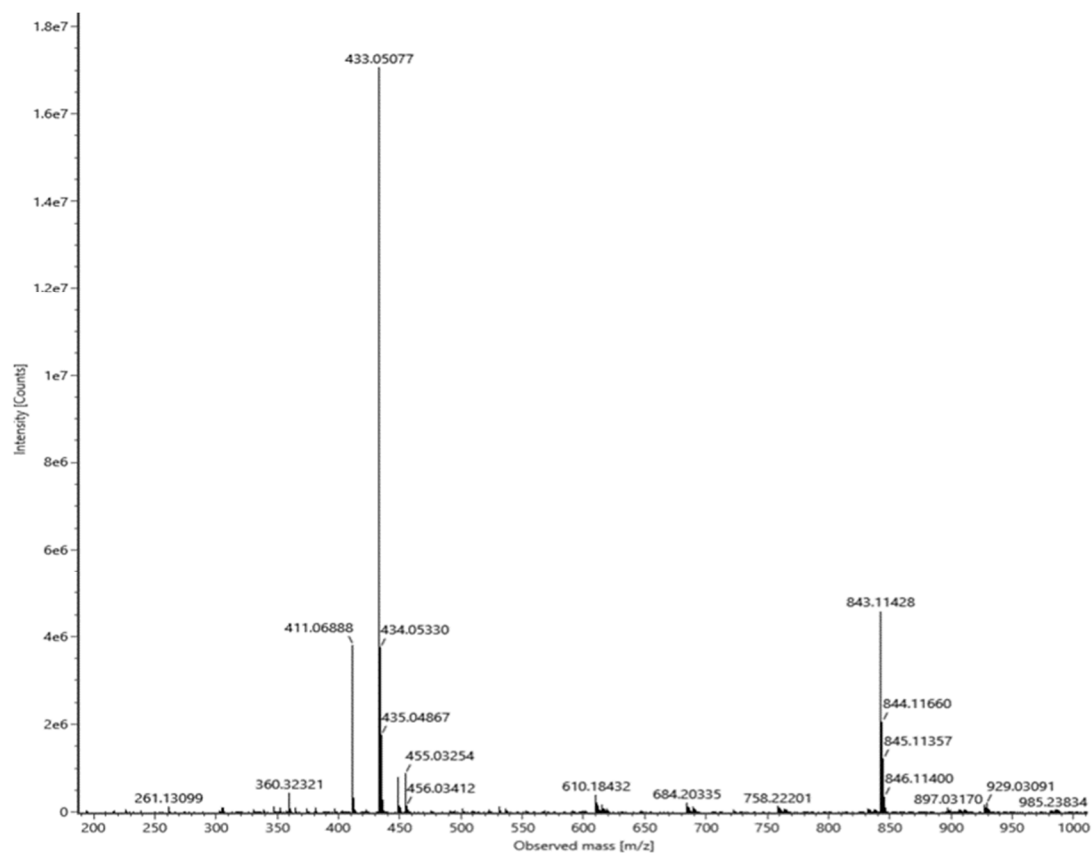

Figure S31.  $^1\text{H}$  NMR,  $^{13}\text{C}$  NMR and HRMS for title compound E<sub>26</sub>.

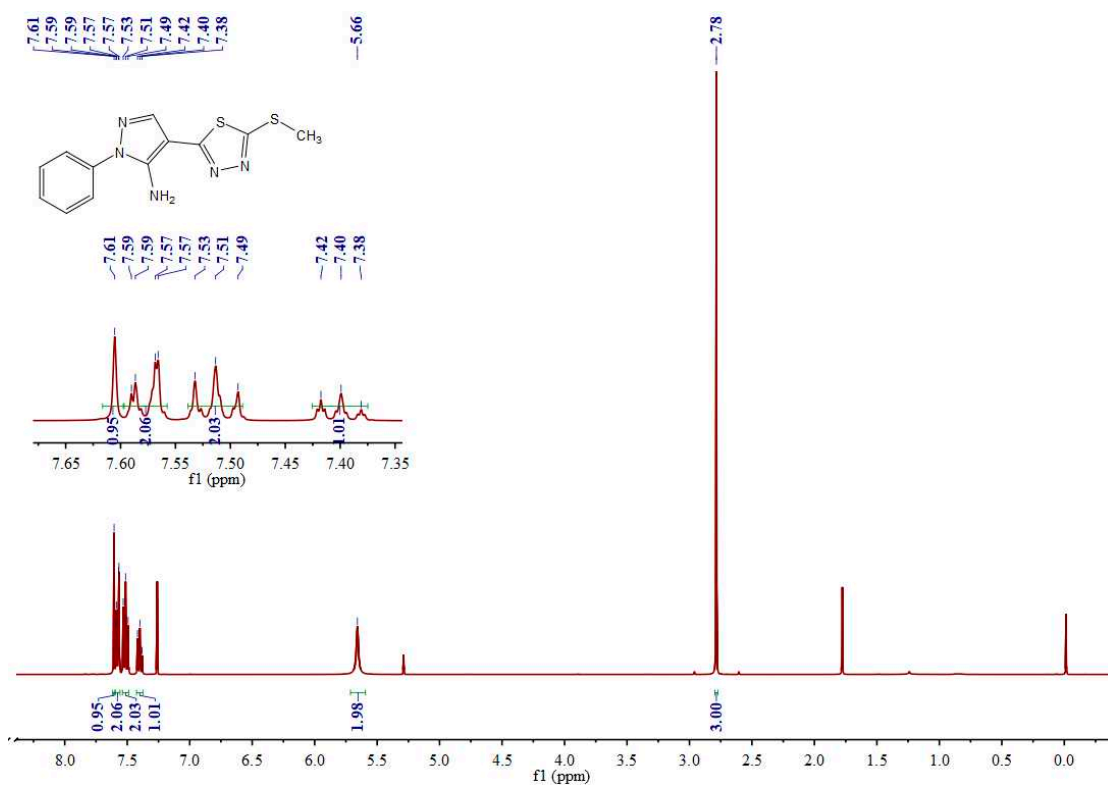

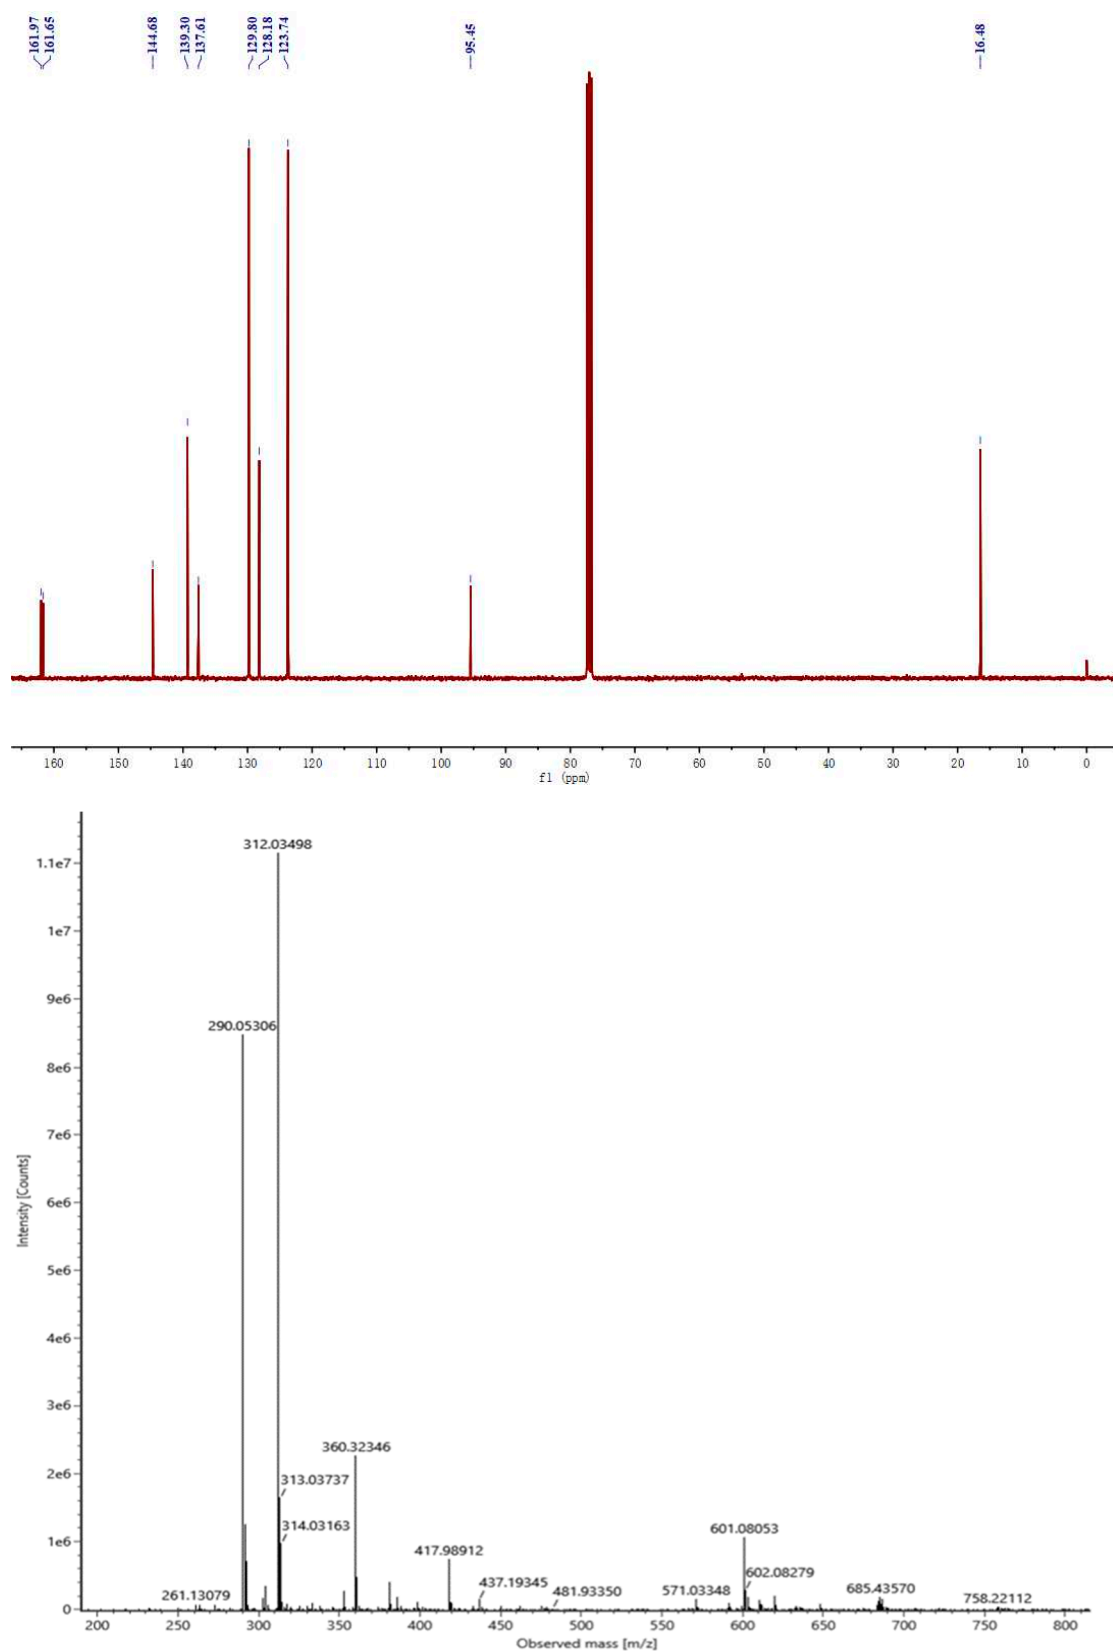

**Figure S32.** <sup>1</sup>H NMR, <sup>13</sup>C NMR and HRMS for title compound E27.

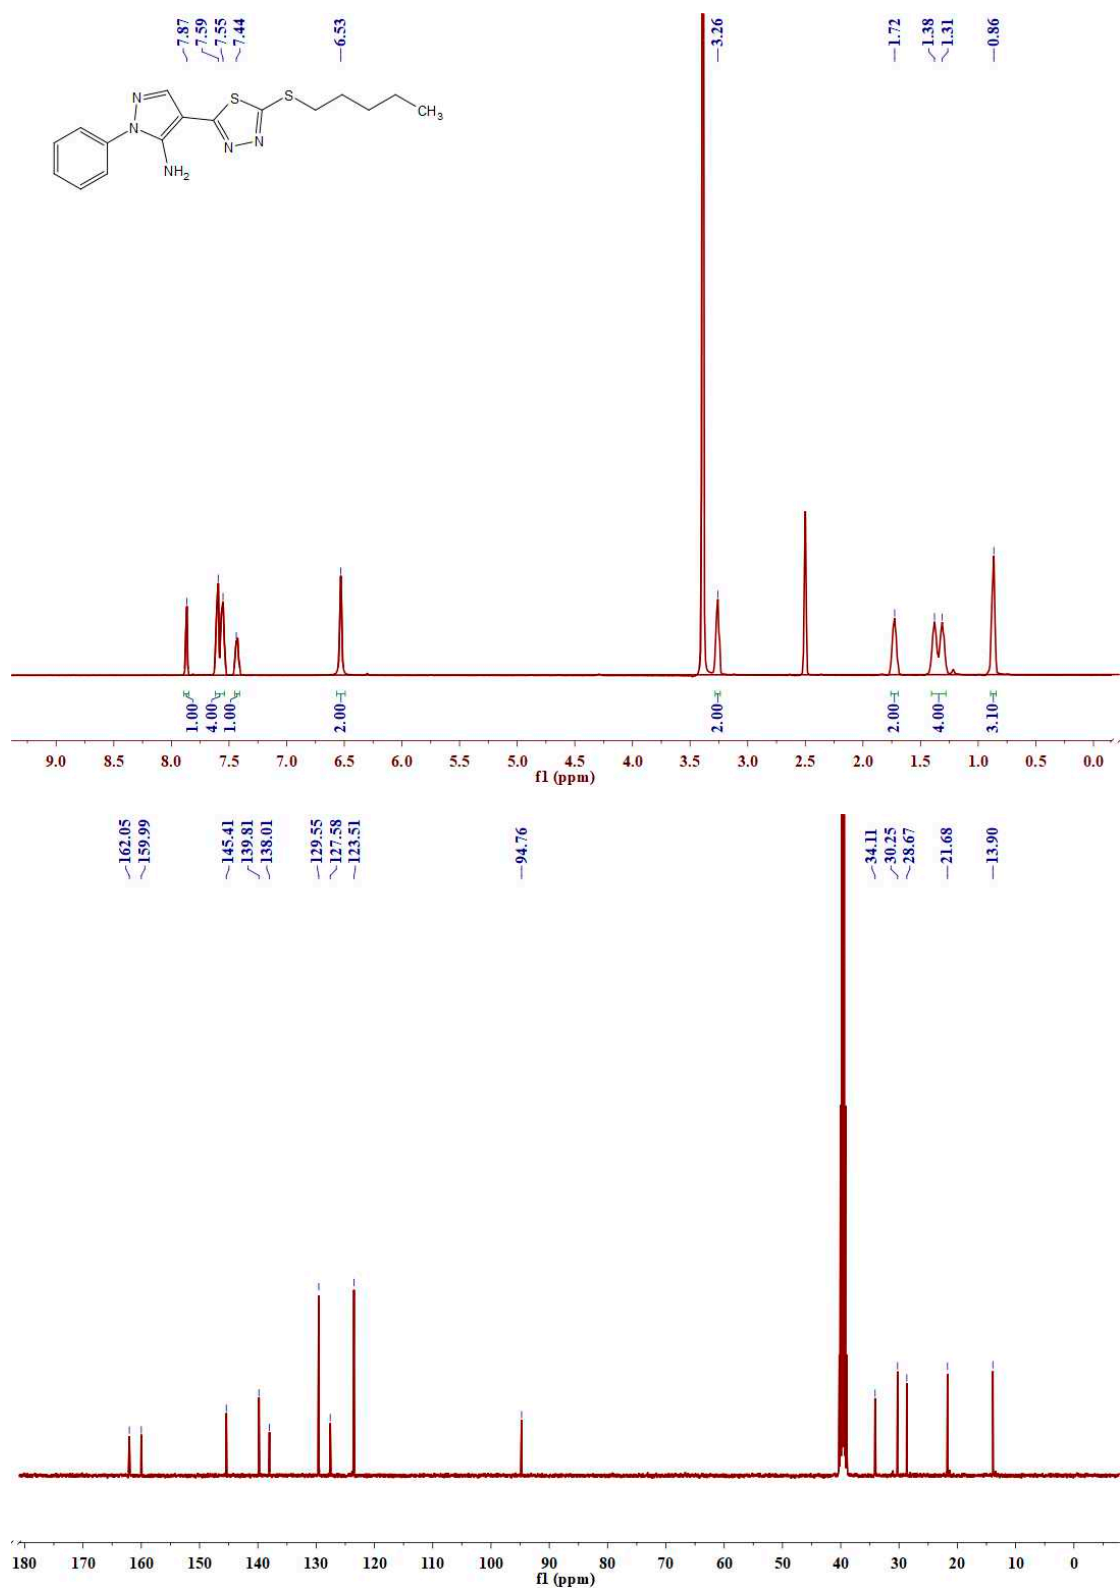

92 #55 RT: 0.55 AV: 1 NL: 3.39E+008  
T: FTMS + p ESI Full ms [150.0000-2200.0000]

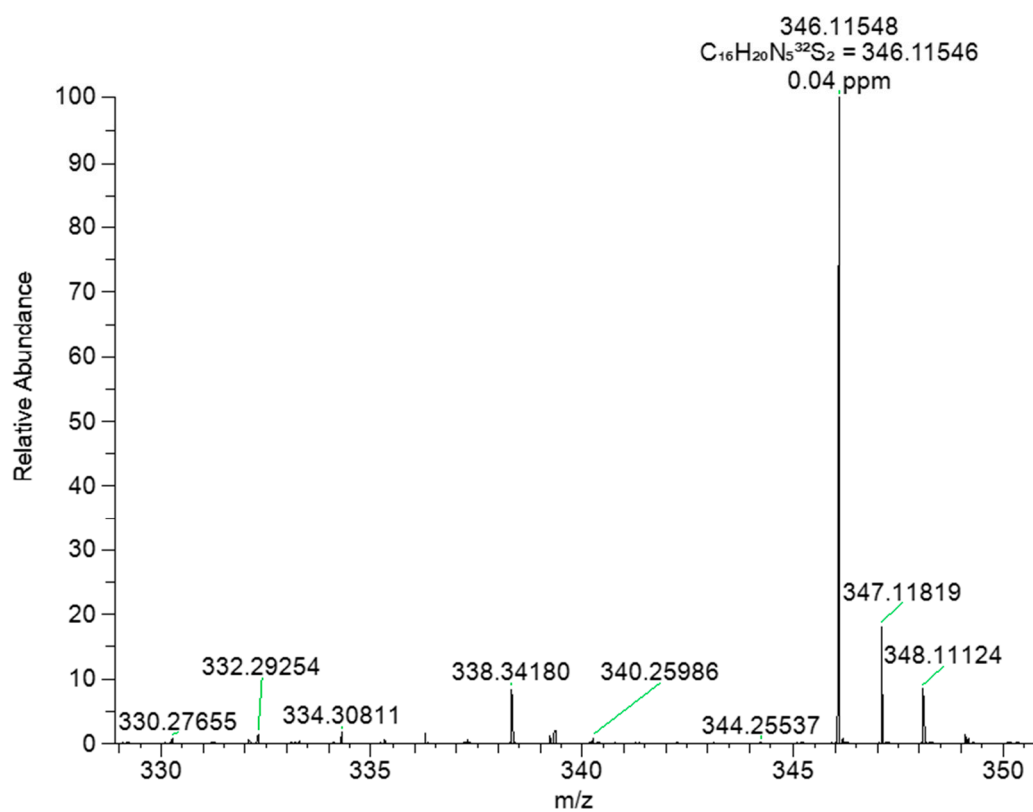

**Figure S33.**  $^1\text{H}$  NMR,  $^{13}\text{C}$  NMR and HRMS for title compound E28.
